# Supplementary material for: Toward Consensus Epitopes B and T of Tropomyosin Involved in Cross-Reactivity across Diverse Allergens: An In Silico Study
Source: MDPI journal article supplement (doi:10.3390/biomedicines12040884), 2024-04-17
Supplement: s1 [file biomedicines-2780602-supplementary.xlsx]

## Sheet: AlgPred_prediction
Num	Asc l 3	IgE_epitope		Num	Aed a 10	IgE_epitope		Num	Der p 10	IgE_epitope		Num	Der f 10	IgE_epitope		Num	Blo t 10	IgE_epitope		Num	Lit v 1	IgE_epitope		Num	Pen m 1	IgE_epitope		Num	Pen a 1	IgE_epitope		Num	Per a 7	IgE_epitope		Num	Bla g 7	IgE_epitope
1	M	0		1	M	1		1	M	0		1	M	0		1	M	0		1	M	1		1	M	1		1	M	1		1	M	1		1	M	1
2	D	0		2	D	1		2	E	0		2	E	0		2	E	0		2	D	1		2	D	1		2	D	1		2	D	1		2	D	1
3	A	1		3	A	1		3	A	0		3	A	0		3	A	0		3	A	1		3	A	1		3	A	1		3	A	1		3	A	1
4	I	1		4	I	1		4	I	0		4	I	1		4	I	1		4	I	1		4	I	1		4	I	1		4	I	1		4	I	1
5	K	1		5	K	1		5	K	0		5	K	1		5	K	1		5	K	1		5	K	1		5	K	1		5	K	1		5	K	1
6	K	1		6	K	1		6	N	0		6	K	1		6	K	1		6	K	1		6	K	1		6	K	1		6	K	1		6	K	1
7	K	1		7	K	1		7	K	0		7	K	1		7	K	1		7	K	1		7	K	1		7	K	1		7	K	1		7	K	1
8	M	1		8	M	1		8	M	0		8	M	1		8	M	1		8	M	1		8	M	1		8	M	1		8	M	1		8	M	1
9	Q	1		9	Q	1		9	Q	0		9	Q	1		9	Q	1		9	Q	1		9	Q	1		9	Q	1		9	Q	1		9	Q	1
10	A	0		10	A	1		10	A	0		10	A	1		10	A	1		10	A	1		10	A	1		10	A	1		10	A	1		10	A	1
11	M	0		11	M	1		11	M	0		11	M	1		11	M	1		11	M	1		11	M	1		11	M	1		11	M	1		11	M	1
12	K	0		12	K	1		12	K	0		12	K	1		12	K	1		12	K	1		12	K	1		12	K	1		12	K	1		12	K	1
13	I	0		13	L	1		13	L	0		13	L	1		13	L	1		13	L	1		13	L	1		13	L	1		13	L	1		13	L	1
14	E	0		14	E	1		14	E	0		14	E	1		14	E	1		14	E	1		14	E	1		14	E	1		14	E	1		14	E	1
15	K	0		15	K	1		15	K	0		15	K	1		15	K	1		15	K	1		15	K	1		15	K	1		15	K	1		15	K	1
16	D	0		16	D	1		16	D	0		16	D	1		16	D	1		16	D	1		16	D	1		16	D	1		16	D	1		16	D	1
17	N	0		17	N	1		17	N	0		17	N	1		17	N	1		17	N	1		17	N	1		17	N	1		17	N	1		17	N	1
18	A	0		18	A	1		18	A	0		18	A	1		18	A	1		18	A	1		18	A	1		18	A	1		18	A	1		18	A	1
19	L	0		19	A	0		19	I	0		19	I	0		19	I	0		19	M	1		19	M	1		19	M	1		19	M	1		19	M	1
20	D	0		20	D	0		20	D	0		20	D	0		20	D	0		20	D	1		20	D	1		20	D	1		20	D	0		20	D	1
21	R	0		21	K	0		21	R	0		21	R	0		21	R	0		21	R	1		21	R	1		21	R	1		21	C	0		21	R	1
22	A	0		22	A	0		22	A	0		22	A	0		22	A	0		22	A	1		22	A	1		22	A	1		22	A	0		22	A	0
23	D	0		23	D	0		23	E	0		23	E	0		23	E	0		23	D	1		23	D	1		23	D	1		23	L	0		23	L	0
24	A	0		24	T	0		24	I	0		24	I	0		24	I	0		24	T	1		24	T	1		24	T	1		24	L	0		24	L	0
25	A	0		25	C	0		25	A	0		25	A	0		25	A	0		25	L	1		25	L	1		25	L	1		25	C	0		25	C	0
26	E	0		26	E	0		26	E	0		26	E	0		26	E	0		26	E	1		26	E	1		26	E	1		26	E	0		26	E	0
27	E	0		27	N	1		27	Q	0		27	Q	0		27	Q	0		27	Q	1		27	Q	1		27	Q	1		27	Q	0		27	Q	0
28	K	0		28	Q	0		28	K	0		28	K	0		28	K	0		28	Q	1		28	Q	1		28	Q	1		28	Q	0		28	Q	0
29	V	0		29	A	0		29	A	0		29	A	0		29	S	0		29	N	1		29	N	1		29	N	1		29	A	0		29	A	0
30	R	0		30	K	0		30	R	0		30	R	0		30	R	0		30	K	1		30	K	1		30	K	1		30	R	0		30	R	0
31	Q	0		31	E	0		31	D	0		31	D	0		31	D	0		31	E	1		31	E	1		31	E	1		31	D	0		31	D	0
32	M	0		32	A	0		32	A	0		32	A	0		32	A	0		32	A	1		32	A	1		32	A	1		32	A	0		32	A	0
33	T	0		33	N	0		33	N	0		33	N	0		33	N	0		33	N	1		33	N	1		33	N	1		33	N	0		33	N	0
34	D	0		34	L	0		34	L	0		34	L	0		34	L	0		34	N	1		34	N	1		34	N	1		34	L	0		34	I	0
35	K	0		35	R	0		35	R	0		35	R	0		35	R	0		35	R	1		35	R	1		35	R	1		35	R	0		35	R	0
36	L	0		36	A	0		36	A	0		36	A	0		36	A	0		36	A	1		36	A	1		36	A	1		36	A	0		36	A	0
37	E	0		37	D	0		37	E	0		37	E	0		37	E	0		37	E	1		37	E	1		37	E	1		37	E	0		37	E	0
38	R	0		38	K	0		38	K	0		38	K	0		38	K	0		38	K	1		38	K	1		38	K	1		38	K	0		38	K	0
39	I	0		39	I	0		39	S	0		39	S	0		39	S	0		39	S	1		39	S	1		39	S	1		39	A	0		39	A	0
40	E	0		40	M	0		40	E	0		40	E	0		40	E	0		40	E	1		40	E	1		40	E	1		40	E	0		40	E	0
41	E	0		41	E	0		41	E	0		41	E	0		41	E	0		41	E	1		41	E	1		41	E	1		41	E	0		41	E	0
42	E	0		42	E	0		42	E	0		42	E	0		42	E	0		42	E	1		42	E	1		42	E	1		42	E	0		42	E	0
43	L	0		43	V	0		43	V	0		43	V	0		43	V	0		43	V	1		43	V	1		43	V	1		43	A	0		43	A	0
44	R	0		44	A	0		44	R	0		44	R	0		44	R	0		44	H	1		44	H	1		44	H	1		44	R	0		44	R	0
45	D	0		45	E	0		45	A	0		45	A	0		45	A	0		45	N	1		45	N	1		45	N	1		45	S	0		45	S	0
46	T	0		46	L	0		46	L	0		46	L	0		46	L	0		46	L	1		46	L	1		46	L	1		46	L	0		46	L	0
47	Q	0		47	T	0		47	Q	0		47	Q	0		47	Q	0		47	Q	1		47	Q	1		47	Q	1		47	Q	0		47	Q	0
48	K	0		48	K	0		48	K	0		48	K	0		48	K	0		48	K	1		48	K	1		48	K	1		48	K	0		48	K	0
49	K	0		49	R	0		49	K	0		49	K	0		49	K	0		49	R	1		49	R	1		49	R	1		49	K	0		49	K	0
50	M	0		50	L	0		50	I	0		50	I	0		50	I	0		50	M	1		50	M	1		50	M	1		50	I	0		50	I	0
51	M	0		51	T	0		51	Q	0		51	Q	0		51	Q	0		51	Q	1		51	Q	1		51	Q	1		51	Q	0		51	Q	0
52	Q	0		52	Q	0		52	Q	0		52	Q	0		52	Q	0		52	Q	1		52	Q	1		52	Q	1		52	Q	0		52	Q	0
53	T	0		53	V	0		53	I	0		53	I	0		53	I	0		53	L	1		53	L	1		53	L	1		53	I	0		53	I	0
54	E	0		54	T	0		54	E	0		54	E	0		54	E	0		54	E	1		54	E	1		54	E	1		54	E	0		54	E	0
55	N	0		55	E	0		55	N	0		55	N	0		55	N	0		55	N	1		55	N	1		55	N	1		55	N	0		55	N	0
56	D	0		56	D	0		56	E	0		56	E	0		56	E	0		56	D	1		56	D	1		56	D	1		56	D	0		56	D	0
57	L	0		57	H	0		57	L	0		57	L	0		57	L	0		57	L	1		57	L	1		57	L	1		57	L	0		57	L	0
58	D	0		58	E	0		58	D	0		58	D	0		58	D	0		58	D	1		58	D	1		58	D	1		58	D	0		58	D	0
59	K	0		59	K	0		59	Q	0		59	Q	0		59	Q	0		59	Q	1		59	Q	1		59	Q	1		59	Q	0		59	Q	0
60	A	0		60	F	0		60	V	0		60	V	0		60	V	0		60	V	1		60	V	1		60	V	1		60	T	0		60	T	0
61	Q	0		61	K	0		61	Q	0		61	Q	0		61	Q	0		61	Q	1		61	Q	1		61	Q	1		61	M	0		61	M	0
62	E	0		62	N	0		62	E	0		62	E	0		62	E	0		62	E	1		62	E	1		62	E	1		62	E	0		62	E	0
63	D	0		63	T	0		63	Q	0		63	Q	0		63	S	0		63	S	1		63	S	1		63	S	1		63	Q	0		63	Q	0
64	L	0		64	L	0		64	L	0		64	L	0		64	L	0		64	L	1		64	L	1		64	L	1		64	L	0		64	L	0
65	S	0		65	E	0		65	S	0		65	S	0		65	T	0		65	L	1		65	L	1		65	L	1		65	M	0		65	M	0
66	V	0		66	Q	0		66	A	0		66	A	0		66	Q	0		66	K	1		66	K	1		66	K	1		66	Q	0		66	Q	0
67	A	0		67	A	0		67	A	0		67	A	0		67	A	0		67	A	1		67	A	1		67	A	1		67	V	0		67	V	0
68	N	0		68	N	0		68	N	0		68	N	0		68	N	0		68	N	1		68	N	1		68	N	1		68	N	0		68	N	0
69	S	0		69	K	0		69	T	0		69	T	0		69	T	0		69	I	1		69	I	1		69	I	1		69	A	0		69	A	0
70	N	0		70	D	0		70	K	0		70	K	0		70	K	0		70	Q	1		70	Q	1		70	Q	1		70	K	0		70	K	0
71	L	0		71	L	0		71	L	0		71	L	0		71	L	0		71	L	1		71	L	1		71	L	1		71	L	0		71	L	0
72	E	0		72	E	0		72	E	0		72	E	0		72	E	0		72	V	1		72	V	1		72	V	1		72	D	0		72	D	0
73	E	0		73	E	0		73	E	0		73	E	0		73	E	0		73	E	1		73	E	1		73	E	1		73	E	0		73	E	0
74	K	0		74	K	0		74	K	0		74	K	0		74	K	0		74	K	1		74	K	1		74	K	1		74	K	0		74	K	0
75	E	0		75	E	0		75	E	0		75	E	0		75	E	0		75	D	1		75	D	1		75	D	1		75	D	0		75	D	0
76	K	0		76	K	0		76	K	0		76	K	0		76	K	0		76	K	1		76	K	1		76	K	1		76	K	0		76	K	0
77	K	0		77	L	0		77	A	0		77	A	0		77	S	0		77	A	1		77	A	1		77	A	1		77	A	0		77	A	0
78	V	0		78	L	0		78	L	0		78	L	0		78	L	0		78	L	1		78	L	1		78	L	1		78	L	0		78	L	0
79	Q	0		79	T	0		79	Q	0		79	Q	0		79	Q	0		79	S	1		79	S	1		79	S	1		79	Q	0		79	Q	0
80	E	0		80	S	0		80	T	0		80	T	0		80	T	0		80	N	1		80	N	1		80	N	1		80	N	0		80	N	0
81	A	0		81	T	0		81	A	0		81	A	0		81	A	0		81	A	1		81	A	1		81	A	1		81	A	0		81	A	0
82	E	0		82	E	0		82	E	0		82	E	0		82	E	0		82	E	1		82	E	1		82	E	1		82	E	0		82	E	0
83	A	0		83	A	0		83	G	0		83	G	0		83	G	0		83	G	1		83	G	1		83	G	1		83	S	0		83	S	0
84	E	0		84	N	0		84	D	0		84	D	0		84	D	0		84	E	1		84	E	1		84	E	1		84	E	0		84	E	0
85	V	1		85	V	0		85	V	1		85	V	1		85	V	1		85	V	1		85	V	1		85	V	1		85	V	1		85	V	1
86	A	1		86	A	0		86	A	1		86	A	1		86	A	1		86	A	1		86	A	1		86	A	1		86	A	1		86	A	1
87	A	1		87	A	0		87	A	1		87	A	1		87	A	1		87	A	1		87	A	1		87	A	1		87	A	1		87	A	1
88	L	1		88	L	0		88	L	1		88	L	1		88	L	1		88	L	1		88	L	1		88	L	1		88	L	1		88	L	1
89	N	1		89	T	0		89	N	1		89	N	1		89	N	1		89	N	1		89	N	1		89	N	1		89	N	1		89	N	1
90	R	1		90	R	0		90	R	1		90	R	1		90	R	1		90	R	1		90	R	1		90	R	1		90	R	1		90	R	1
91	R	1		91	K	0		91	R	1		91	R	1		91	R	1		91	R	1		91	R	1		91	R	1		91	R	1		91	R	1
92	M	0		92	V	0		92	I	1		92	I	0		92	I	0		92	I	1		92	I	1		92	I	1		92	I	1		92	I	1
93	T	0		93	Q	0		93	Q	0		93	Q	0		93	Q	0		93	Q	1		93	Q	1		93	Q	1		93	Q	1		93	Q	1
94	L	0		94	Q	0		94	L	0		94	L	0		94	L	0		94	L	1		94	L	1		94	L	1		94	L	1		94	L	1
95	L	0		95	V	0		95	I	0		95	I	0		95	I	0		95	L	1		95	L	1		95	L	1		95	L	1		95	L	1
96	E	0		96	E	0		96	E	0		96	E	0		96	E	0		96	E	1		96	E	1		96	E	1		96	E	1		96	E	1
97	E	0		97	E	0		97	E	0		97	E	0		97	E	0		97	E	1		97	E	1		97	E	1		97	E	1		97	E	1
98	E	0		98	D	0		98	D	0		98	D	0		98	D	0		98	D	1		98	D	1		98	D	1		98	D	1		98	D	1
99	L	0		99	L	0		99	L	0		99	L	0		99	L	0		99	L	1		99	L	1		99	L	1		99	L	1		99	L	1
100	E	0		100	E	0		100	E	0		100	E	0		100	E	0		100	E	1		100	E	1		100	E	1		100	E	1		100	E	1
101	R	0		101	K	0		101	R	0		101	R	0		101	R	0		101	R	1		101	R	1		101	R	1		101	R	1		101	R	1
102	A	0		102	S	0		102	S	0		102	S	0		102	S	0		102	S	1		102	S	1		102	S	1		102	S	1		102	S	1
103	E	0		103	E	0		103	E	0		103	E	0		103	E	0		103	E	1		103	E	1		103	E	1		103	E	1		103	E	1
104	E	0		104	E	0		104	E	0		104	E	0		104	E	0		104	E	1		104	E	1		104	E	1		104	E	1		104	E	1
105	R	0		105	R	0		105	R	0		105	R	0		105	R	0		105	R	1		105	R	1		105	R	1		105	R	1		105	R	1
106	L	0		106	S	0		106	L	0		106	L	0		106	L	0		106	L	1		106	L	1		106	L	1		106	L	0		106	L	0
107	K	0		107	G	0		107	K	0		107	K	0		107	K	0		107	N	1		107	N	1		107	N	1		107	A	0		107	A	0
108	L	0		108	A	0		108	I	1		108	I	1		108	V	0		108	T	1		108	T	1		108	T	1		108	T	0		108	T	0
109	A	0		109	A	0		109	A	1		109	A	1		109	A	0		109	A	1		109	A	1		109	A	1		109	A	0		109	A	0
110	T	0		110	L	0		110	T	0		110	T	0		110	T	0		110	T	1		110	T	1		110	T	1		110	T	0		110	T	0
111	E	0		111	S	0		111	A	0		111	A	0		111	A	0		111	T	1		111	T	1		111	T	1		111	A	0		111	A	0
112	K	0		112	K	0		112	K	0		112	K	0		112	K	0		112	K	1		112	K	1		112	K	1		112	K	0		112	K	0
113	L	0		113	L	0		113	L	0		113	L	0		113	L	0		113	L	1		113	L	1		113	L	1		113	L	0		113	L	0
114	E	0		114	L	0		114	E	0		114	E	0		114	E	0		114	A	1		114	A	1		114	A	1		114	A	0		114	A	0
115	E	0		115	E	0		115	E	0		115	E	0		115	E	0		115	E	1		115	E	1		115	E	1		115	E	0		115	E	0
116	A	0		116	A	0		116	A	0		116	A	0		116	A	0		116	A	1		116	A	1		116	A	1		116	A	0		116	A	0
117	T	0		117	T	0		117	S	0		117	S	0		117	S	0		117	S	1		117	S	1		117	S	1		117	S	0		117	S	0
118	H	0		118	Q	0		118	Q	0		118	Q	0		118	H	0		118	Q	1		118	Q	1		118	Q	1		118	Q	0		118	Q	0
119	T	0		119	S	0		119	S	0		119	S	0		119	S	0		119	A	1		119	A	1		119	A	1		119	A	0		119	A	0
120	A	0		120	A	0		120	A	0		120	A	0		120	A	0		120	A	1		120	A	1		120	A	1		120	V	0		120	A	0
121	D	0		121	D	0		121	D	0		121	D	0		121	D	0		121	D	1		121	D	1		121	D	1		121	D	0		121	D	0
122	E	0		122	E	0		122	E	0		122	E	0		122	E	0		122	E	1		122	E	1		122	E	1		122	E	0		122	E	0
123	S	0		123	N	0		123	S	0		123	S	0		123	S	0		123	S	1		123	S	1		123	S	1		123	S	0		123	S	0
124	E	0		124	N	0		124	E	0		124	E	0		124	E	0		124	E	1		124	E	1		124	E	1		124	E	0		124	E	0
125	R	0		125	R	0		125	R	0		125	R	0		125	R	0		125	R	1		125	R	1		125	R	1		125	R	0		125	R	0
126	V	0		126	M	0		126	M	0		126	M	0		126	M	0		126	M	1		126	M	1		126	M	1		126	A	0		126	A	0
127	R	0		127	C	0		127	R	0		127	R	0		127	R	0		127	R	1		127	R	1		127	R	1		127	R	0		127	R	0
128	K	0		128	K	1		128	K	0		128	K	0		128	K	0		128	K	1		128	K	1		128	K	1		128	K	0		128	K	0
129	V	0		129	V	1		129	M	0		129	M	0		129	M	0		129	V	1		129	V	1		129	V	1		129	I	0		129	I	0
130	M	0		130	L	1		130	L	0		130	L	0		130	L	0		130	L	1		130	L	1		130	L	1		130	L	0		130	L	0
131	E	0		131	E	1		131	E	0		131	E	0		131	E	0		131	E	1		131	E	1		131	E	1		131	E	0		131	E	0
132	N	0		132	N	1		132	H	0		132	H	0		132	H	0		132	N	1		132	N	1		132	N	1		132	S	0		132	S	0
133	R	0		133	R	1		133	R	0		133	R	0		133	R	0		133	R	1		133	R	1		133	R	1		133	K	0		133	K	0
134	S	0		134	S	0		134	S	0		134	S	0		134	S	0		134	S	1		134	S	1		134	S	1		134	G	0		134	G	0
135	F	0		135	Q	0		135	I	0		135	I	0		135	I	0		135	L	1		135	L	1		135	L	1		135	L	0		135	L	0
136	Q	0		136	Q	0		136	T	0		136	T	0		136	T	0		136	S	1		136	S	1		136	S	1		136	A	0		136	A	0
137	D	0		137	D	1		137	D	1		137	D	1		137	D	1		137	D	1		137	D	1		137	D	1		137	D	1		137	D	1
138	E	0		138	E	1		138	E	1		138	E	1		138	E	1		138	E	1		138	E	1		138	E	1		138	E	1		138	E	1
139	E	0		139	E	1		139	E	1		139	E	1		139	E	1		139	E	1		139	E	1		139	E	1		139	E	1		139	E	1
140	R	0		140	R	1		140	R	1		140	R	1		140	R	1		140	R	1		140	R	1		140	R	1		140	R	1		140	R	1
141	A	0		141	M	1		141	M	1		141	M	1		141	M	1		141	M	1		141	M	1		141	M	1		141	M	1		141	M	1
142	N	0		142	D	0		142	E	0		142	D	0		142	D	0		142	D	1		142	D	1		142	D	1		142	D	1		142	D	1
143	T	0		143	Q	0		143	G	0		143	G	0		143	G	0		143	A	1		143	A	1		143	A	1		143	A	1		143	A	1
144	V	0		144	L	0		144	L	0		144	L	0		144	L	0		144	L	1		144	L	1		144	L	1		144	L	1		144	L	1
145	E	0		145	S	0		145	E	1		145	E	1		145	E	0		145	E	1		145	E	1		145	E	1		145	E	1		145	E	1
146	S	0		146	N	0		146	N	1		146	N	1		146	S	0		146	N	1		146	N	1		146	N	1		146	N	1		146	N	1
147	Q	0		147	Q	0		147	Q	1		147	Q	1		147	Q	0		147	Q	1		147	Q	1		147	Q	1		147	Q	1		147	Q	1
148	L	0		148	L	0		148	L	1		148	L	1		148	L	0		148	L	1		148	L	1		148	L	1		148	L	1		148	L	1
149	K	0		149	K	0		149	K	1		149	K	1		149	K	0		149	K	1		149	K	1		149	K	1		149	K	1		149	K	1
150	E	0		150	E	0		150	E	1		150	E	1		150	E	0		150	E	1		150	E	1		150	E	1		150	E	1		150	E	1
151	A	0		151	A	0		151	A	1		151	A	1		151	A	0		151	A	1		151	A	1		151	A	1		151	A	1		151	A	1
152	Q	0		152	R	0		152	R	0		152	R	0		152	R	0		152	R	1		152	R	1		152	R	1		152	R	1		152	R	1
153	M	0		153	M	0		153	M	0		153	M	0		153	M	0		153	F	1		153	F	1		153	F	1		153	F	1		153	F	1
154	L	0		154	L	0		154	M	0		154	M	0		154	M	0		154	L	1		154	L	1		154	L	1		154	M	0		154	M	0
155	A	1		155	A	0		155	A	0		155	A	0		155	A	0		155	A	1		155	A	1		155	A	1		155	A	0		155	A	0
156	E	1		156	E	0		156	E	0		156	E	0		156	E	0		156	E	1		156	E	1		156	E	1		156	E	0		156	E	0
157	E	1		157	D	0		157	D	0		157	D	0		157	D	0		157	E	1		157	E	1		157	E	1		157	E	0		157	E	0
158	A	1		158	A	0		158	A	0		158	A	0		158	A	0		158	A	1		158	A	1		158	A	1		158	A	0		158	A	0
159	D	1		159	D	0		159	D	0		159	D	0		159	D	0		159	D	1		159	D	1		159	D	1		159	D	0		159	D	0
160	R	1		160	G	0		160	R	1		160	R	1		160	R	1		160	R	1		160	R	1		160	R	1		160	K	0		160	K	0
161	K	1		161	K	0		161	K	1		161	K	1		161	K	1		161	K	1		161	K	1		161	K	1		161	K	0		161	K	0
162	Y	1		162	S	0		162	Y	1		162	Y	1		162	Y	1		162	Y	1		162	Y	1		162	Y	1		162	Y	0		162	Y	0
163	D	1		163	D	0		163	D	1		163	D	1		163	D	1		163	D	1		163	D	1		163	D	1		163	D	1		163	D	1
164	E	1		164	E	0		164	E	1		164	E	1		164	E	1		164	E	1		164	E	1		164	E	1		164	E	1		164	E	1
165	V	1		165	V	0		165	V	1		165	V	1		165	V	1		165	V	1		165	V	1		165	V	1		165	V	1		165	V	1
166	A	1		166	S	0		166	A	1		166	A	1		166	A	1		166	A	1		166	A	1		166	A	1		166	A	1		166	A	1
167	R	1		167	R	0		167	R	1		167	R	1		167	R	1		167	R	1		167	R	1		167	R	1		167	R	1		167	R	1
168	K	1		168	K	0		168	K	1		168	K	1		168	K	1		168	K	1		168	K	1		168	K	1		168	K	1		168	K	1
169	L	1		169	L	0		169	L	1		169	L	1		169	L	1		169	L	1		169	L	1		169	L	1		169	L	1		169	L	1
170	A	1		170	A	0		170	A	1		170	A	1		170	A	1		170	A	1		170	A	1		170	A	1		170	A	1		170	A	1
171	M	1		171	F	0		171	M	1		171	M	1		171	M	1		171	M	1		171	M	1		171	M	1		171	M	1		171	M	1
172	V	1		172	V	0		172	V	1		172	V	1		172	V	1		172	V	1		172	V	1		172	V	1		172	V	1		172	V	1
173	E	1		173	E	0		173	E	1		173	E	1		173	E	1		173	E	1		173	E	1		173	E	1		173	E	1		173	E	1
174	A	1		174	D	0		174	A	1		174	A	1		174	A	1		174	A	1		174	A	1		174	A	1		174	A	1		174	A	1
175	D	1		175	E	0		175	D	1		175	D	1		175	D	1		175	D	1		175	D	1		175	D	1		175	D	1		175	D	1
176	L	1		176	L	0		176	L	1		176	L	1		176	L	1		176	L	1		176	L	1		176	L	1		176	L	1		176	L	1
177	E	1		177	E	0		177	E	1		177	E	1		177	E	1		177	E	1		177	E	1		177	E	1		177	E	1		177	E	1
178	R	1		178	V	0		178	R	1		178	R	1		178	R	1		178	R	1		178	R	1		178	R	1		178	R	1		178	R	1
179	A	1		179	A	0		179	A	1		179	A	1		179	A	1		179	A	1		179	A	1		179	A	1		179	A	1		179	A	1
180	E	1		180	E	0		180	E	1		180	E	1		180	E	1		180	E	1		180	E	1		180	E	1		180	E	1		180	E	1
181	E	1		181	D	0		181	E	1		181	E	1		181	E	1		181	E	1		181	E	1		181	E	1		181	E	1		181	E	1
182	R	1		182	R	0		182	R	1		182	R	1		182	R	1		182	R	1		182	R	1		182	R	1		182	R	1		182	R	1
183	A	1		183	V	0		183	A	1		183	A	1		183	A	1		183	A	1		183	A	1		183	A	1		183	A	1		183	A	1
184	E	0		184	K	0		184	E	1		184	E	1		184	E	1		184	E	1		184	E	1		184	E	1		184	E	0		184	E	1
185	A	0		185	S	0		185	T	1		185	T	1		185	T	1		185	T	1		185	T	1		185	T	1		185	S	0		185	T	1
186	G	0		186	G	0		186	G	1		186	G	1		186	G	1		186	G	1		186	G	1		186	G	1		186	G	0		186	G	1
187	E	0		187	E	0		187	E	1		187	E	1		187	E	0		187	E	1		187	E	1		187	E	1		187	E	1		187	E	1
188	N	0		188	A	0		188	S	1		188	S	1		188	T	0		188	S	1		188	S	1		188	S	1		188	S	1		188	S	1
189	K	0		189	K	0		189	K	1		189	K	1		189	K	0		189	K	1		189	K	1		189	K	1		189	K	1		189	K	1
190	I	1		190	I	0		190	I	1		190	I	1		190	I	1		190	I	1		190	I	1		190	I	1		190	I	1		190	I	1
191	V	1		191	M	0		191	V	1		191	V	1		191	V	1		191	V	1		191	V	1		191	V	1		191	V	1		191	V	1
192	E	1		192	E	0		192	E	1		192	E	1		192	E	1		192	E	1		192	E	1		192	E	1		192	E	1		192	E	1
193	L	1		193	L	0		193	L	1		193	L	1		193	L	1		193	L	1		193	L	1		193	L	1		193	L	1		193	L	1
194	E	1		194	E	0		194	E	1		194	E	1		194	E	1		194	E	1		194	E	1		194	E	1		194	E	1		194	E	1
195	E	1		195	E	0		195	E	1		195	E	1		195	E	1		195	E	1		195	E	1		195	E	1		195	E	1		195	E	1
196	E	1		196	E	0		196	E	1		196	E	1		196	E	1		196	E	1		196	E	1		196	E	1		196	E	1		196	E	1
197	L	1		197	L	0		197	L	1		197	L	1		197	L	1		197	L	1		197	L	1		197	L	1		197	L	1		197	L	1
198	R	1		198	K	0		198	R	1		198	R	1		198	R	1		198	R	1		198	R	1		198	R	1		198	R	1		198	R	1
199	V	1		199	V	0		199	V	1		199	V	1		199	V	1		199	V	1		199	V	1		199	V	1		199	V	1		199	V	1
200	V	1		200	V	0		200	V	1		200	V	1		200	V	1		200	V	1		200	V	1		200	V	1		200	V	1		200	V	1
201	G	1		201	G	0		201	G	1		201	G	1		201	G	1		201	G	1		201	G	1		201	G	1		201	G	1		201	G	1
202	N	1		202	N	0		202	N	1		202	N	1		202	N	1		202	N	1		202	N	1		202	N	1		202	N	1		202	N	1
203	N	1		203	S	0		203	N	1		203	N	1		203	N	1		203	N	1		203	N	1		203	N	1		203	N	1		203	N	1
204	L	1		204	L	0		204	L	1		204	L	1		204	L	1		204	L	1		204	L	1		204	L	1		204	L	1		204	L	1
205	K	1		205	K	0		205	K	1		205	K	1		205	K	1		205	K	1		205	K	1		205	K	1		205	K	1		205	K	1
206	S	1		206	S	0		206	S	1		206	S	1		206	S	1		206	S	1		206	S	1		206	S	1		206	S	1		206	S	1
207	L	1		207	L	0		207	L	1		207	L	1		207	L	1		207	L	1		207	L	1		207	L	1		207	L	1		207	L	1
208	E	1		208	E	0		208	E	1		208	E	1		208	E	1		208	E	1		208	E	1		208	E	1		208	E	1		208	E	1
209	V	1		209	V	0		209	V	1		209	V	1		209	V	1		209	V	1		209	V	1		209	V	1		209	V	1		209	V	1
210	S	1		210	S	0		210	S	1		210	S	1		210	S	1		210	S	1		210	S	1		210	S	1		210	S	1		210	S	1
211	E	1		211	E	0		211	E	1		211	E	1		211	E	1		211	E	1		211	E	1		211	E	1		211	E	1		211	E	1
212	E	1		212	D	0		212	E	1		212	E	1		212	E	1		212	E	1		212	E	1		212	E	1		212	E	1		212	E	1
213	K	1		213	K	0		213	K	1		213	K	1		213	K	1		213	K	1		213	K	1		213	K	1		213	K	1		213	K	1
214	A	0		214	A	0		214	A	0		214	A	0		214	A	0		214	A	1		214	A	1		214	A	1		214	A	0		214	A	0
215	L	0		215	N	0		215	Q	0		215	Q	0		215	Q	0		215	N	1		215	N	1		215	N	1		215	N	0		215	N	0
216	Q	0		216	Q	0		216	Q	0		216	Q	0		216	Q	0		216	Q	1		216	Q	1		216	Q	1		216	L	0		216	L	0
217	R	0		217	R	0		217	R	0		217	R	0		217	R	0		217	R	1		217	R	1		217	R	1		217	R	0		217	R	0
218	E	0		218	V	0		218	E	0		218	E	0		218	E	0		218	E	1		218	E	1		218	E	1		218	E	0		218	E	0
219	D	0		219	E	0		219	E	0		219	E	0		219	E	0		219	E	1		219	E	1		219	E	1		219	E	0		219	E	0
220	S	0		220	E	0		220	A	0		220	A	0		220	A	0		220	A	1		220	A	1		220	A	1		220	E	0		220	E	0
221	Y	0		221	F	0		221	H	0		221	Y	0		221	Y	0		221	Y	1		221	Y	1		221	Y	1		221	Y	0		221	Y	0
222	E	0		222	K	0		222	E	0		222	E	0		222	E	0		222	K	1		222	K	1		222	K	1		222	K	0		222	K	0
223	E	0		223	R	0		223	Q	0		223	Q	0		223	Q	0		223	E	1		223	E	1		223	E	1		223	Q	0		223	Q	0
224	Q	0		224	Q	0		224	Q	0		224	Q	0		224	Q	0		224	Q	1		224	Q	1		224	Q	1		224	Q	0		224	Q	0
225	I	0		225	L	0		225	I	0		225	I	0		225	I	0		225	I	1		225	I	1		225	I	1		225	I	0		225	I	0
226	R	0		226	K	0		226	R	0		226	R	0		226	R	0		226	K	1		226	K	1		226	K	1		226	K	0		226	K	0
227	T	0		227	S	0		227	I	0		227	I	0		227	M	0		227	T	1		227	T	1		227	T	1		227	T	0		227	T	0
228	V	0		228	L	0		228	M	0		228	M	0		228	M	0		228	L	1		228	L	1		228	L	1		228	L	0		228	L	0
229	S	0		229	T	0		229	T	0		229	T	0		229	T	0		229	T	1		229	T	1		229	T	1		229	T	0		229	N	0
230	A	0		230	I	0		230	T	0		230	A	0		230	G	0		230	N	1		230	N	1		230	N	1		230	T	0		230	T	0
231	R	0		231	K	0		231	K	0		231	K	0		231	K	0		231	K	1		231	K	1		231	K	1		231	R	0		231	R	0
232	L	0		232	L	0		232	L	0		232	L	0		232	L	0		232	L	1		232	L	1		232	L	1		232	L	0		232	L	0
233	K	0		233	K	0		233	K	0		233	K	0		233	K	0		233	K	1		233	K	1		233	K	1		233	K	0		233	K	0
234	E	0		234	E	0		234	E	0		234	E	0		234	E	0		234	A	1		234	A	1		234	A	1		234	E	0		234	E	0
235	A	0		235	A	0		235	A	1		235	A	0		235	A	0		235	A	1		235	A	1		235	A	1		235	A	1		235	A	1
236	E	0		236	E	0		236	E	1		236	E	1		236	E	0		236	E	1		236	E	1		236	E	1		236	E	1		236	E	1
237	T	0		237	T	0		237	A	1		237	A	1		237	A	0		237	A	1		237	A	1		237	A	1		237	A	1		237	A	1
238	R	1		238	R	0		238	R	1		238	R	1		238	R	0		238	R	1		238	R	1		238	R	1		238	R	1		238	R	1
239	A	1		239	A	0		239	A	1		239	A	1		239	A	0		239	A	1		239	A	1		239	A	1		239	A	1		239	A	1
240	E	1		240	E	0		240	E	1		240	E	1		240	E	0		240	E	1		240	E	1		240	E	1		240	E	1		240	E	1
241	F	1		241	N	0		241	F	1		241	F	1		241	F	0		241	F	1		241	F	1		241	F	1		241	F	1		241	F	1
242	A	1		242	A	0		242	A	1		242	A	1		242	A	0		242	A	1		242	A	1		242	A	1		242	A	1		242	A	1
243	E	1		243	E	0		243	E	1		243	E	1		243	E	0		243	E	1		243	E	1		243	E	1		243	E	1		243	E	1
244	R	1		244	K	0		244	R	1		244	R	1		244	R	0		244	R	1		244	R	1		244	R	1		244	R	1		244	R	1
245	S	1		245	N	0		245	S	1		245	S	1		245	S	0		245	S	1		245	S	1		245	S	1		245	S	1		245	S	1
246	V	1		246	V	0		246	V	1		246	V	1		246	V	0		246	V	1		246	V	1		246	V	1		246	V	1		246	V	1
247	Q	1		247	K	0		247	Q	1		247	Q	1		247	R	0		247	Q	1		247	Q	1		247	Q	1		247	Q	1		247	Q	1
248	K	1		248	K	0		248	K	1		248	K	1		248	K	0		248	K	1		248	K	1		248	K	1		248	K	1		248	K	1
249	L	1		249	L	0		249	L	1		249	L	1		249	L	0		249	L	1		249	L	1		249	L	1		249	L	1		249	L	1
250	Q	1		250	Q	0		250	Q	1		250	Q	1		250	Q	1		250	Q	1		250	Q	1		250	Q	1		250	Q	1		250	Q	1
251	K	1		251	K	1		251	K	1		251	K	1		251	K	1		251	K	1		251	K	1		251	K	1		251	K	1		251	K	1
252	E	1		252	E	1		252	E	1		252	E	1		252	E	1		252	E	1		252	E	1		252	E	1		252	E	1		252	E	1
253	V	1		253	V	1		253	V	0		253	V	1		253	V	1		253	V	1		253	V	1		253	V	1		253	V	1		253	V	1
254	D	1		254	D	1		254	G	0		254	D	1		254	D	1		254	D	1		254	D	1		254	D	1		254	D	1		254	D	1
255	R	1		255	R	1		255	R	0		255	R	1		255	R	1		255	R	1		255	R	1		255	R	1		255	R	1		255	R	1
256	L	1		256	L	1		256	L	0		256	L	1		256	L	1		256	L	1		256	L	1		256	L	1		256	L	1		256	L	1
257	E	1		257	E	1		257	E	0		257	E	1		257	E	1		257	E	1		257	E	1		257	E	1		257	E	1		257	E	1
258	D	1		258	D	1		258	D	0		258	D	1		258	D	1		258	D	1		258	D	1		258	D	1		258	D	1		258	D	1
259	E	1		259	E	1		259	E	0		259	E	1		259	E	1		259	E	1		259	E	1		259	E	1		259	E	1		259	E	1
260	L	1		260	L	0		260	L	0		260	L	1		260	L	1		260	L	1		260	L	1		260	L	1		260	L	1		260	L	1
261	V	1		261	G	0		261	V	0		261	V	1		261	V	1		261	V	1		261	V	1		261	V	1		261	V	1		261	V	1
262	H	0		262	V	0		262	H	0		262	H	0		262	H	0		262	N	1		262	N	1		262	N	1		262	H	0		262	H	0
263	E	0		263	N	0		263	E	0		263	E	0		263	E	0		263	E	1		263	E	1		263	E	1		263	E	0		263	E	0
264	K	0		264	K	0		264	K	0		264	K	0		264	K	0		264	K	1		264	K	1		264	K	1		264	K	0		264	K	0
265	E	0		265	D	0		265	E	0		265	E	0		265	E	0		265	E	1		265	E	1		265	E	1		265	E	0		265	E	0
266	R	0		266	R	0		266	K	0		266	K	0		266	K	0		266	K	1		266	K	1		266	K	1		266	K	0		266	K	0
267	Y	0		267	Y	0		267	Y	0		267	Y	0		267	Y	0		267	Y	1		267	Y	1		267	Y	1		267	Y	0		267	Y	0
268	K	0		268	K	0		268	K	0		268	K	0		268	K	0		268	K	1		268	K	1		268	K	1		268	K	0		268	K	0
269	S	0		269	S	0		269	S	0		269	S	0		269	S	0		269	S	1		269	S	1		269	S	1		269	F	0		269	Y	0
270	I	0		270	L	0		270	I	0		270	I	0		270	I	0		270	I	1		270	I	1		270	I	1		270	I	0		270	I	0
271	S	0		271	A	0		271	S	0		271	S	0		271	S	0		271	T	1		271	T	1		271	T	1		271	C	0		271	C	0
272	E	0		272	D	0		272	D	0		272	D	0		272	D	0		272	D	1		272	D	1		272	D	1		272	D	0		272	D	0
273	E	0		273	E	0		273	E	0		273	E	0		273	E	0		273	E	1		273	E	1		273	E	1		273	D	0		273	D	0
274	L	0		274	M	0		274	L	0		274	L	0		274	L	0		274	L	1		274	L	1		274	L	1		274	L	0		274	L	0
275	D	0		275	D	0		275	D	0		275	D	0		275	D	0		275	D	1		275	D	1		275	D	1		275	D	0		275	D	0
276	Q	0		276	S	0		276	Q	0		276	Q	0		276	Q	0		276	Q	1		276	Q	1		276	Q	1		276	M	0		276	M	0
277	T	0		277	T	0		277	T	0		277	T	0		277	T	0		277	T	1		277	T	1		277	T	1		277	T	0		277	T	0
278	F	0		278	F	0		278	F	0		278	F	0		278	F	0		278	F	1		278	F	1		278	F	1		278	F	0		278	F	0
279	Q	0		279	A	0		279	A	0		279	A	0		279	A	0		279	S	1		279	S	1		279	S	1		279	T	0		279	T	0
280	E	0		280	E	0		280	E	0		280	E	0		280	E	0		280	E	1		280	E	1		280	E	1		280	E	0		280	E	0
281	L	0		281	L	0		281	L	0		281	L	0		281	L	0		281	L	1		281	L	1		281	L	1		281	L	0		281	L	0
282	S	0		282	A	0		282	T	0		282	T	0		282	T	0		282	S	1		282	S	1		282	S	1		282	A	0		282	I	0
283	G	0		283	G	0		283	G	0		283	G	0		283	G	0		283	G	1		283	G	1		283	G	1		283	G	0		283	G	0
284	Y	0		284	Y	0		284	Y	0		284	Y	0		284	Y	0		284	Y	1		284	Y	1		284	Y	1		284	Y	0		284	N	0
285	R	0		285	-	0		285	-	0		285	-	0		285	-	0		285	-	0		285	-	0		285	-	0		285	-	0		285	-	0
286	S	0		286	-	0		286	-	0		286	-	0		286	-	0		286	-	0		286	-	0		286	-	0		286	-	0		286	-	0
287	D	0		287	-	0		287	-	0		287	-	0		287	-	0		287	-	0		287	-	0		287	-	0		287	-	0		287	-	0

## Sheet: BepiPred_prediction
Num	Asc l 3	Smoothed_Score	B_epitope		Num	Aed a 10	Smoothed_Score	B_epitope		Num	Der p 10	Smoothed_Score	B_epitope		Num	Der f 10	Smoothed_Score	B_epitope		Num	Blo t 10	Smoothed_Score	B_epitope		Num	Lit v 1	Smoothed_Score	B_epitope		Num	Pen m 1	Smoothed_Score	B_epitope		Num	Pen a 1	Smoothed_Score	B_epitope		Num	Per a 7	Smoothed_Score	B_epitope		Num	Bla g 7	Smoothed_Score	B_epitope
1	M	0.0595569	0		1	M	0.0673057	0		1	M	0.065082	0		1	M	0.063285	0		1	M	0.0637632	0		1	M	0.0633156	0		1	M	0.0633156	0		1	M	0.0633156	0		1	M	0.0626603	0		1	M	0.0658004	0
2	D	0.0756849	0		2	D	0.084174	0		2	E	0.0805503	0		2	E	0.0780799	0		2	E	0.0782203	0		2	D	0.0799174	0		2	D	0.0799174	0		2	D	0.0799174	0		2	D	0.0777731	0		2	D	0.0817478	0
3	A	0.0902676	0		3	A	0.101219	0		3	A	0.0964086	0		3	A	0.0932846	0		3	A	0.0946896	0		3	A	0.0961567	0		3	A	0.0961567	0		3	A	0.0961567	0		3	A	0.0944054	0		3	A	0.0987833	0
4	I	0.0980026	0		4	I	0.111805	0		4	I	0.104749	0		4	I	0.102098	0		4	I	0.103623	0		4	I	0.105656	0		4	I	0.105656	0		4	I	0.105656	0		4	I	0.103343	0		4	I	0.108334	0
5	K	0.116748	0		5	K	0.134198	0		5	K	0.124383	0		5	K	0.121564	0		5	K	0.123884	0		5	K	0.126073	0		5	K	0.126073	0		5	K	0.126073	0		5	K	0.123707	0		5	K	0.128894	0
6	K	0.121874	0		6	K	0.138641	0		6	N	0.131294	0		6	K	0.128415	0		6	K	0.131449	0		6	K	0.131696	0		6	K	0.131696	0		6	K	0.131696	0		6	K	0.128893	0		6	K	0.134656	0
7	K	0.117126	0		7	K	0.131788	0		7	K	0.121808	0		7	K	0.119791	0		7	K	0.12269	0		7	K	0.125861	0		7	K	0.125861	0		7	K	0.125861	0		7	K	0.122284	0		7	K	0.127682	0
8	M	0.121905	0		8	M	0.137477	0		8	M	0.127487	0		8	M	0.126237	0		8	M	0.1293	0		8	M	0.133172	0		8	M	0.133172	0		8	M	0.133172	0		8	M	0.127496	0		8	M	0.132597	0
9	Q	0.136295	0		9	Q	0.151994	1		9	Q	0.142221	0		9	Q	0.141001	0		9	Q	0.143568	0		9	Q	0.14839	0		9	Q	0.14839	0		9	Q	0.14839	0		9	Q	0.139583	0		9	Q	0.145776	0
10	A	0.132606	0		10	A	0.148638	0		10	A	0.138369	0		10	A	0.136682	0		10	A	0.139569	0		10	A	0.141484	0		10	A	0.141484	0		10	A	0.141484	0		10	A	0.13516	0		10	A	0.14064	0
11	M	0.121304	0		11	M	0.137921	0		11	M	0.12734	0		11	M	0.126176	0		11	M	0.129408	0		11	M	0.129502	0		11	M	0.129502	0		11	M	0.129502	0		11	M	0.124912	0		11	M	0.129321	0
12	K	0.122068	0		12	K	0.138759	0		12	K	0.127382	0		12	K	0.126338	0		12	K	0.128179	0		12	K	0.128162	0		12	K	0.128162	0		12	K	0.128162	0		12	K	0.12526	0		12	K	0.129242	0
13	I	0.134005	0		13	L	0.149942	0		13	L	0.138607	0		13	L	0.137048	0		13	L	0.138698	0		13	L	0.138355	0		13	L	0.138355	0		13	L	0.138355	0		13	L	0.137015	0		13	L	0.140582	0
14	E	0.118149	0		14	E	0.132105	0		14	E	0.121667	0		14	E	0.12021	0		14	E	0.121006	0		14	E	0.120932	0		14	E	0.120932	0		14	E	0.120932	0		14	E	0.1202	0		14	E	0.123132	0
15	K	0.112095	0		15	K	0.127281	0		15	K	0.115248	0		15	K	0.113949	0		15	K	0.114183	0		15	K	0.114977	0		15	K	0.114977	0		15	K	0.114977	0		15	K	0.116948	0		15	K	0.118406	0
16	D	0.119071	0		16	D	0.137001	0		16	D	0.123586	0		16	D	0.122494	0		16	D	0.122617	0		16	D	0.122699	0		16	D	0.122699	0		16	D	0.122699	0		16	D	0.127325	0		16	D	0.12815	0
17	N	0.118254	0		17	N	0.132976	0		17	N	0.118139	0		17	N	0.117473	0		17	N	0.118062	0		17	N	0.120408	0		17	N	0.120408	0		17	N	0.120408	0		17	N	0.123017	0		17	N	0.124142	0
18	A	0.0994337	0		18	A	0.113001	0		18	A	0.0988227	0		18	A	0.0977852	0		18	A	0.0987519	0		18	A	0.100623	0		18	A	0.100623	0		18	A	0.100623	0		18	A	0.105696	0		18	A	0.104944	0
19	L	0.100727	0		19	A	0.115219	0		19	I	0.101446	0		19	I	0.100312	0		19	I	0.100631	0		19	M	0.104098	0		19	M	0.104098	0		19	M	0.104098	0		19	M	0.10974	0		19	M	0.107445	0
20	D	0.106362	0		20	D	0.125482	0		20	D	0.112953	0		20	D	0.112369	0		20	D	0.11233	0		20	D	0.113977	0		20	D	0.113977	0		20	D	0.113977	0		20	D	0.122549	0		20	D	0.120849	0
21	R	0.0944399	0		21	K	0.113259	0		21	R	0.100574	0		21	R	0.100541	0		21	R	0.100559	0		21	R	0.103885	0		21	R	0.103885	0		21	R	0.103885	0		21	C	0.110074	0		21	R	0.107505	0
22	A	0.0822578	0		22	A	0.103072	0		22	A	0.0897413	0		22	A	0.0897797	0		22	A	0.0899572	0		22	A	0.0945556	0		22	A	0.0945556	0		22	A	0.0945556	0		22	A	0.100735	0		22	A	0.0963505	0
23	D	0.0956733	0		23	D	0.119706	0		23	E	0.105341	0		23	E	0.105084	0		23	E	0.105242	0		23	D	0.109459	0		23	D	0.109459	0		23	D	0.109459	0		23	L	0.121495	0		23	L	0.116479	0
24	A	0.102099	0		24	T	0.122369	0		24	I	0.107164	0		24	I	0.107653	0		24	I	0.107939	0		24	T	0.109282	0		24	T	0.109282	0		24	T	0.109282	0		24	L	0.121266	0		24	L	0.116735	0
25	A	0.0892841	0		25	C	0.105959	0		25	A	0.0925638	0		25	A	0.0931223	0		25	A	0.0941144	0		25	L	0.0954437	0		25	L	0.0954437	0		25	L	0.0954437	0		25	C	0.104103	0		25	C	0.100188	0
26	E	0.092151	0		26	E	0.113754	0		26	E	0.103046	0		26	E	0.10328	0		26	E	0.102573	0		26	E	0.0983235	0		26	E	0.0983235	0		26	E	0.0983235	0		26	E	0.115064	0		26	E	0.110744	0
27	E	0.107159	0		27	N	0.132537	0		27	Q	0.120231	0		27	Q	0.120757	0		27	Q	0.119634	0		27	Q	0.116387	0		27	Q	0.116387	0		27	Q	0.116387	0		27	Q	0.131704	0		27	Q	0.127649	0
28	K	0.0997082	0		28	Q	0.119482	0		28	K	0.108114	0		28	K	0.108665	0		28	K	0.107551	0		28	Q	0.102816	0		28	Q	0.102816	0		28	Q	0.102816	0		28	Q	0.117373	0		28	Q	0.114709	0
29	V	0.100417	0		29	A	0.115008	0		29	A	0.101941	0		29	A	0.102126	0		29	S	0.100815	0		29	N	0.0982465	0		29	N	0.0982465	0		29	N	0.0982465	0		29	A	0.109927	0		29	A	0.107466	0
30	R	0.115677	0		30	K	0.12868	0		30	R	0.115947	0		30	R	0.116179	0		30	R	0.115298	0		30	K	0.111191	0		30	K	0.111191	0		30	K	0.111191	0		30	R	0.12196	0		30	R	0.121659	0
31	Q	0.122204	0		31	E	0.135169	0		31	D	0.12213	0		31	D	0.122398	0		31	D	0.121813	0		31	E	0.116689	0		31	E	0.116689	0		31	E	0.116689	0		31	D	0.125704	0		31	D	0.12695	0
32	M	0.110075	0		32	A	0.117055	0		32	A	0.105975	0		32	A	0.106532	0		32	A	0.10594	0		32	A	0.100618	0		32	A	0.100618	0		32	A	0.100618	0		32	A	0.103378	0		32	A	0.105779	0
33	T	0.115668	0		33	N	0.122263	0		33	N	0.109985	0		33	N	0.110152	0		33	N	0.109818	0		33	N	0.107084	0		33	N	0.107084	0		33	N	0.107084	0		33	N	0.108949	0		33	N	0.111847	0
34	D	0.135492	0		34	L	0.14037	0		34	L	0.125136	0		34	L	0.125441	0		34	L	0.124795	0		34	N	0.123212	0		34	N	0.123212	0		34	N	0.123212	0		34	L	0.123862	0		34	I	0.127409	0
35	K	0.121503	0		35	R	0.12406	0		35	R	0.105037	0		35	R	0.105366	0		35	R	0.105408	0		35	R	0.108253	0		35	R	0.108253	0		35	R	0.108253	0		35	R	0.102358	0		35	R	0.105473	0
36	L	0.123195	0		36	A	0.118772	0		36	A	0.0977576	0		36	A	0.0975589	0		36	A	0.0977498	0		36	A	0.098508	0		36	A	0.098508	0		36	A	0.098508	0		36	A	0.0939252	0		36	A	0.0969134	0
37	E	0.136944	0		37	D	0.138595	0		37	E	0.114138	0		37	E	0.113543	0		37	E	0.11373	0		37	E	0.117078	0		37	E	0.117078	0		37	E	0.117078	0		37	E	0.11094	0		37	E	0.114455	0
38	R	0.140699	0		38	K	0.145724	0		38	K	0.119977	0		38	K	0.119164	0		38	K	0.120422	0		38	K	0.122548	0		38	K	0.122548	0		38	K	0.122548	0		38	K	0.114662	0		38	K	0.118059	0
39	I	0.126692	0		39	I	0.131152	0		39	S	0.105608	0		39	S	0.104609	0		39	S	0.105312	0		39	S	0.107914	0		39	S	0.107914	0		39	S	0.107914	0		39	A	0.100419	0		39	A	0.102698	0
40	E	0.137487	0		40	M	0.131106	0		40	E	0.114435	0		40	E	0.112909	0		40	E	0.112759	0		40	E	0.11238	0		40	E	0.11238	0		40	E	0.11238	0		40	E	0.105746	0		40	E	0.108485	0
41	E	0.151302	1		41	E	0.149581	0		41	E	0.125238	0		41	E	0.123479	0		41	E	0.12334	0		41	E	0.12866	0		41	E	0.12866	0		41	E	0.12866	0		41	E	0.116245	0		41	E	0.119278	0
42	E	0.134775	0		42	E	0.138493	0		42	E	0.11408	0		42	E	0.112203	0		42	E	0.111483	0		42	E	0.1179	0		42	E	0.1179	0		42	E	0.1179	0		42	E	0.105488	0		42	E	0.107702	0
43	L	0.125778	0		43	V	0.140075	0		43	V	0.113383	0		43	V	0.11097	0		43	V	0.11089	0		43	V	0.116771	0		43	V	0.116771	0		43	V	0.116771	0		43	A	0.104066	0		43	A	0.105931	0
44	R	0.140342	0		44	A	0.154468	1		44	R	0.128516	0		44	R	0.125584	0		44	R	0.125959	0		44	H	0.132105	0		44	H	0.132105	0		44	H	0.132105	0		44	R	0.119107	0		44	R	0.121317	0
45	D	0.136812	0		45	E	0.157158	1		45	A	0.131137	0		45	A	0.128446	0		45	A	0.128874	0		45	N	0.140274	0		45	N	0.140274	0		45	N	0.140274	0		45	S	0.121338	0		45	S	0.124207	0
46	T	0.119688	0		46	L	0.138623	0		46	L	0.116432	0		46	L	0.114125	0		46	L	0.114195	0		46	L	0.123774	0		46	L	0.123774	0		46	L	0.123774	0		46	L	0.105055	0		46	L	0.107397	0
47	Q	0.125769	0		47	T	0.139822	0		47	Q	0.122474	0		47	Q	0.120413	0		47	Q	0.120922	0		47	Q	0.133182	0		47	Q	0.133182	0		47	Q	0.133182	0		47	Q	0.113373	0		47	Q	0.115571	0
48	K	0.14233	0		48	K	0.15549	1		48	K	0.139011	0		48	K	0.136813	0		48	K	0.138491	0		48	K	0.154627	1		48	K	0.154627	1		48	K	0.154627	1		48	K	0.132147	0		48	K	0.134361	0
49	K	0.122842	0		49	R	0.143122	0		49	K	0.122076	0		49	K	0.120194	0		49	K	0.121986	0		49	R	0.139067	0		49	R	0.139067	0		49	R	0.139067	0		49	K	0.117717	0		49	K	0.119628	0
50	M	0.120774	0		50	L	0.132428	0		50	I	0.126617	0		50	I	0.124944	0		50	I	0.126954	0		50	M	0.14054	0		50	M	0.14054	0		50	M	0.14054	0		50	I	0.123353	0		50	I	0.125684	0
51	M	0.135515	0		51	T	0.149715	0		51	Q	0.140499	0		51	Q	0.138805	0		51	Q	0.14192	0		51	Q	0.156281	1		51	Q	0.156281	1		51	Q	0.156281	1		51	Q	0.137618	0		51	Q	0.141373	0
52	Q	0.130602	0		52	Q	0.14064	0		52	Q	0.138756	0		52	Q	0.137395	0		52	Q	0.139781	0		52	Q	0.15074	1		52	Q	0.15074	1		52	Q	0.15074	1		52	Q	0.133521	0		52	Q	0.137498	0
53	T	0.113107	0		53	V	0.124787	0		53	I	0.124539	0		53	I	0.123514	0		53	I	0.125347	0		53	L	0.135394	0		53	L	0.135394	0		53	L	0.135394	0		53	I	0.120004	0		53	I	0.12362	0
54	E	0.116267	0		54	T	0.129886	0		54	E	0.126089	0		54	E	0.124986	0		54	E	0.127306	0		54	E	0.136718	0		54	E	0.136718	0		54	E	0.136718	0		54	E	0.124915	0		54	E	0.128486	0
55	N	0.132157	0		55	E	0.145163	0		55	N	0.13988	0		55	N	0.138878	0		55	N	0.140524	0		55	N	0.153083	1		55	N	0.153083	1		55	N	0.153083	1		55	N	0.137774	0		55	N	0.142173	0
56	D	0.113356	0		56	D	0.131165	0		56	E	0.122583	0		56	E	0.121424	0		56	E	0.122372	0		56	D	0.133399	0		56	D	0.133399	0		56	D	0.133399	0		56	D	0.120376	0		56	D	0.124517	0
57	L	0.10558	0		57	H	0.128387	0		57	L	0.121374	0		57	L	0.12031	0		57	L	0.120836	0		57	L	0.127932	0		57	L	0.127932	0		57	L	0.127932	0		57	L	0.117355	0		57	L	0.121142	0
58	D	0.11985	0		58	E	0.142635	0		58	D	0.130671	0		58	D	0.129429	0		58	D	0.130731	0		58	D	0.143151	0		58	D	0.143151	0		58	D	0.143151	0		58	D	0.127421	0		58	D	0.131554	0
59	K	0.113186	0		59	K	0.143061	0		59	Q	0.126147	0		59	Q	0.125074	0		59	Q	0.124577	0		59	Q	0.136687	0		59	Q	0.136687	0		59	Q	0.136687	0		59	Q	0.124456	0		59	Q	0.12831	0
60	A	0.0967637	0		60	F	0.124034	0		60	V	0.11089	0		60	V	0.109865	0		60	V	0.109121	0		60	V	0.121138	0		60	V	0.121138	0		60	V	0.121138	0		60	T	0.108783	0		60	T	0.111429	0
61	Q	0.102351	0		61	K	0.132591	0		61	Q	0.110608	0		61	Q	0.109773	0		61	Q	0.110027	0		61	Q	0.130476	0		61	Q	0.130476	0		61	Q	0.130476	0		61	M	0.113006	0		61	M	0.115322	0
62	E	0.115855	0		62	N	0.149372	0		62	E	0.116754	0		62	E	0.116267	0		62	E	0.122963	0		62	E	0.145657	0		62	E	0.145657	0		62	E	0.145657	0		62	E	0.124204	0		62	E	0.126704	0
63	D	0.100885	0		63	T	0.129615	0		63	Q	0.103557	0		63	Q	0.103107	0		63	S	0.1094	0		63	S	0.129295	0		63	S	0.129295	0		63	S	0.129295	0		63	Q	0.110635	0		63	Q	0.112891	0
64	L	0.093676	0		64	L	0.122988	0		64	L	0.0958923	0		64	L	0.0953653	0		64	L	0.10307	0		64	L	0.122713	0		64	L	0.122713	0		64	L	0.122713	0		64	L	0.107102	0		64	L	0.108647	0
65	S	0.105235	0		65	E	0.137749	0		65	S	0.105067	0		65	S	0.104487	0		65	T	0.113497	0		65	L	0.138426	0		65	L	0.138426	0		65	L	0.138426	0		65	M	0.113964	0		65	M	0.115649	0
66	V	0.105545	0		66	Q	0.136215	0		66	A	0.0974266	0		66	A	0.0969984	0		66	Q	0.105917	0		66	K	0.134021	0		66	K	0.134021	0		66	K	0.134021	0		66	Q	0.108254	0		66	Q	0.110161	0
67	A	0.0897274	0		67	A	0.121159	0		67	A	0.0845354	0		67	A	0.0843642	0		67	A	0.0926356	0		67	A	0.117959	0		67	A	0.117959	0		67	A	0.117959	0		67	V	0.0957955	0		67	V	0.0973991	0
68	N	0.0998016	0		68	N	0.131886	0		68	N	0.0913808	0		68	N	0.0906588	0		68	N	0.101552	0		68	N	0.122785	0		68	N	0.122785	0		68	N	0.122785	0		68	N	0.0979762	0		68	N	0.0994824	0
69	S	0.115523	0		69	K	0.152032	1		69	T	0.106434	0		69	T	0.10583	0		69	T	0.118037	0		69	I	0.138459	0		69	I	0.138459	0		69	I	0.138459	0		69	A	0.111902	0		69	A	0.113594	0
70	N	0.107495	0		70	D	0.139318	0		70	K	0.0981584	0		70	K	0.0974681	0		70	K	0.108188	0		70	Q	0.1259	0		70	Q	0.1259	0		70	Q	0.1259	0		70	K	0.103577	0		70	K	0.105045	0
71	L	0.103032	0		71	L	0.133611	0		71	L	0.0969549	0		71	L	0.0960084	0		71	L	0.100642	0		71	L	0.116664	0		71	L	0.116664	0		71	L	0.116664	0		71	L	0.0966848	0		71	L	0.0979259	0
72	E	0.118736	0		72	E	0.149562	0		72	E	0.115023	0		72	E	0.113948	0		72	E	0.118576	0		72	V	0.136638	0		72	V	0.136638	0		72	V	0.136638	0		72	D	0.1136	0		72	D	0.114665	0
73	E	0.118409	0		73	E	0.151588	1		73	E	0.111429	0		73	E	0.110405	0		73	E	0.116292	0		73	E	0.13118	0		73	E	0.13118	0		73	E	0.13118	0		73	E	0.108423	0		73	E	0.109465	0
74	K	0.107634	0		74	K	0.135738	0		74	K	0.101731	0		74	K	0.100788	0		74	K	0.104729	0		74	K	0.114147	0		74	K	0.114147	0		74	K	0.114147	0		74	K	0.100588	0		74	K	0.10138	0
75	E	0.111757	0		75	E	0.139046	0		75	E	0.110366	0		75	E	0.109152	0		75	E	0.113505	0		75	D	0.117685	0		75	D	0.117685	0		75	D	0.117685	0		75	D	0.11051	0		75	D	0.110894	0
76	K	0.125973	0		76	K	0.151307	1		76	K	0.123663	0		76	K	0.122446	0		76	K	0.127241	0		76	K	0.132626	0		76	K	0.132626	0		76	K	0.132626	0		76	K	0.124653	0		76	K	0.125016	0
77	K	0.111022	0		77	L	0.136948	0		77	A	0.10831	0		77	A	0.10755	0		77	S	0.111166	0		77	A	0.119306	0		77	A	0.119306	0		77	A	0.119306	0		77	A	0.111657	0		77	A	0.111598	0
78	V	0.10436	0		78	L	0.129443	0		78	L	0.103996	0		78	L	0.102926	0		78	L	0.105101	0		78	L	0.114972	0		78	L	0.114972	0		78	L	0.114972	0		78	L	0.108403	0		78	L	0.107934	0
79	Q	0.113186	0		79	T	0.134082	0		79	Q	0.113397	0		79	Q	0.112059	0		79	Q	0.114512	0		79	S	0.12241	0		79	S	0.12241	0		79	S	0.12241	0		79	Q	0.117225	0		79	Q	0.117339	0
80	E	0.118221	0		80	S	0.134632	0		80	T	0.118121	0		80	T	0.116482	0		80	T	0.118878	0		80	N	0.130088	0		80	N	0.130088	0		80	N	0.130088	0		80	N	0.125944	0		80	N	0.12624	0
81	A	0.103713	0		81	T	0.118633	0		81	A	0.101969	0		81	A	0.100438	0		81	A	0.102501	0		81	A	0.111397	0		81	A	0.111397	0		81	A	0.111397	0		81	A	0.109963	0		81	A	0.110358	0
82	E	0.107815	0		82	E	0.11878	0		82	E	0.111909	0		82	E	0.10989	0		82	E	0.11046	0		82	E	0.121011	0		82	E	0.121011	0		82	E	0.121011	0		82	E	0.118086	0		82	E	0.118769	0
83	A	0.121117	0		83	A	0.125206	0		83	G	0.125763	0		83	G	0.123716	0		83	G	0.125021	0		83	G	0.135726	0		83	G	0.135726	0		83	G	0.135726	0		83	S	0.129766	0		83	S	0.131045	0
84	E	0.108899	0		84	N	0.111692	0		84	D	0.111638	0		84	D	0.109844	0		84	D	0.110121	0		84	E	0.122111	0		84	E	0.122111	0		84	E	0.122111	0		84	E	0.112604	0		84	E	0.114145	0
85	V	0.108357	0		85	V	0.110369	0		85	V	0.113458	0		85	V	0.111497	0		85	V	0.111942	0		85	V	0.123763	0		85	V	0.123763	0		85	V	0.123763	0		85	V	0.113113	0		85	V	0.114929	0
86	A	0.131175	0		86	A	0.127839	0		86	A	0.136712	0		86	A	0.13445	0		86	A	0.134856	0		86	A	0.147238	0		86	A	0.147238	0		86	A	0.147238	0		86	A	0.13506	0		86	A	0.137071	0
87	A	0.143419	0		87	A	0.127691	0		87	A	0.145845	0		87	A	0.143827	0		87	A	0.144069	0		87	A	0.154279	1		87	A	0.154279	1		87	A	0.154279	1		87	A	0.14321	0		87	A	0.145543	0
88	L	0.134402	0		88	L	0.118198	0		88	L	0.135498	0		88	L	0.133706	0		88	L	0.133915	0		88	L	0.142131	0		88	L	0.142131	0		88	L	0.142131	0		88	L	0.131484	0		88	L	0.133332	0
89	N	0.138666	0		89	T	0.12582	0		89	N	0.144872	0		89	N	0.143461	0		89	N	0.144854	0		89	N	0.148797	0		89	N	0.148797	0		89	N	0.148797	0		89	N	0.137316	0		89	N	0.138954	0
90	R	0.158302	1		90	R	0.146796	0		90	R	0.164537	1		90	R	0.163198	1		90	R	0.166018	1		90	R	0.169097	1		90	R	0.169097	1		90	R	0.169097	1		90	R	0.155519	1		90	R	0.15756	1
91	R	0.148444	0		91	K	0.136046	0		91	R	0.15417	1		91	R	0.153172	1		91	R	0.155887	1		91	R	0.155741	1		91	R	0.155741	1		91	R	0.155741	1		91	R	0.144928	0		91	R	0.146563	0
92	M	0.154142	1		92	V	0.142758	0		92	I	0.155886	1		92	I	0.154701	1		92	I	0.158159	1		92	I	0.158119	1		92	I	0.158119	1		92	I	0.158119	1		92	I	0.148957	0		92	I	0.150909	1
93	T	0.1767	1		93	Q	0.16128	1		93	Q	0.176961	1		93	Q	0.175331	1		93	Q	0.179346	1		93	Q	0.179508	1		93	Q	0.179508	1		93	Q	0.179508	1		93	Q	0.168659	1		93	Q	0.171179	1
94	L	0.180336	1		94	Q	0.158234	1		94	L	0.17425	1		94	L	0.172849	1		94	L	0.176748	1		94	L	0.175023	1		94	L	0.175023	1		94	L	0.175023	1		94	L	0.166559	1		94	L	0.169676	1
95	L	0.15972	1		95	V	0.137313	0		95	I	0.15285	1		95	I	0.151706	1		95	I	0.155701	1		95	L	0.153183	1		95	L	0.153183	1		95	L	0.153183	1		95	L	0.146093	0		95	L	0.148946	0
96	E	0.158318	1		96	E	0.139474	0		96	E	0.149703	0		96	E	0.148619	0		96	E	0.153237	1		96	E	0.151758	1		96	E	0.151758	1		96	E	0.151758	1		96	E	0.143861	0		96	E	0.147268	0
97	E	0.177991	1		97	E	0.155979	1		97	E	0.169113	1		97	E	0.167934	1		97	E	0.172803	1		97	E	0.173572	1		97	E	0.173572	1		97	E	0.173572	1		97	E	0.162956	1		97	E	0.167246	1
98	E	0.160612	1		98	D	0.135367	0		98	D	0.148576	0		98	D	0.147421	0		98	D	0.151123	1		98	D	0.152745	1		98	D	0.152745	1		98	D	0.152745	1		98	D	0.143492	0		98	D	0.147997	0
99	L	0.157393	1		99	L	0.126683	0		99	L	0.142473	0		99	L	0.141058	0		99	L	0.143987	0		99	L	0.147982	0		99	L	0.147982	0		99	L	0.147982	0		99	L	0.137826	0		99	L	0.142743	0
100	E	0.175527	1		100	E	0.143686	0		100	E	0.156267	1		100	E	0.155085	1		100	E	0.156868	1		100	E	0.163639	1		100	E	0.163639	1		100	E	0.163639	1		100	E	0.152768	1		100	E	0.158144	1
101	R	0.174607	1		101	K	0.146793	0		101	R	0.156846	1		101	R	0.155992	1		101	R	0.156427	1		101	R	0.162202	1		101	R	0.162202	1		101	R	0.162202	1		101	R	0.151263	1		101	R	0.15632	1
102	A	0.150902	1		102	S	0.127637	0		102	S	0.134835	0		102	S	0.134372	0		102	S	0.13434	0		102	S	0.141088	0		102	S	0.141088	0		102	S	0.141088	0		102	S	0.1307	0		102	S	0.135342	0
103	E	0.149005	0		103	E	0.131245	0		103	E	0.136279	0		103	E	0.13572	0		103	E	0.136441	0		103	E	0.146328	0		103	E	0.146328	0		103	E	0.146328	0		103	E	0.129442	0		103	E	0.133707	0
104	E	0.15907	1		104	E	0.141178	0		104	E	0.14477	0		104	E	0.14406	0		104	E	0.14405	0		104	E	0.154267	1		104	E	0.154267	1		104	E	0.154267	1		104	E	0.136766	0		104	E	0.141244	0
105	R	0.141171	0		105	R	0.1269	0		105	R	0.128605	0		105	R	0.127792	0		105	R	0.126834	0		105	R	0.136331	0		105	R	0.136331	0		105	R	0.136331	0		105	R	0.120405	0		105	R	0.124275	0
106	L	0.127124	0		106	S	0.122202	0		106	L	0.114835	0		106	L	0.113977	0		106	L	0.113019	0		106	L	0.123899	0		106	L	0.123899	0		106	L	0.123899	0		106	L	0.109243	0		106	L	0.112417	0
107	K	0.144285	0		107	G	0.138128	0		107	K	0.123476	0		107	K	0.122875	0		107	K	0.12168	0		107	N	0.137485	0		107	N	0.137485	0		107	N	0.137485	0		107	A	0.119386	0		107	A	0.122383	0
108	L	0.13655	0		108	A	0.137146	0		108	I	0.117663	0		108	I	0.117281	0		108	V	0.115751	0		108	T	0.13084	0		108	T	0.13084	0		108	T	0.13084	0		108	T	0.115019	0		108	T	0.116925	0
109	A	0.116029	0		109	A	0.117969	0		109	A	0.0998648	0		109	A	0.0993695	0		109	A	0.0990532	0		109	A	0.113516	0		109	A	0.113516	0		109	A	0.113516	0		109	A	0.0979769	0		109	A	0.0991016	0
110	T	0.118084	0		110	L	0.121358	0		110	T	0.101145	0		110	T	0.100515	0		110	T	0.100271	0		110	T	0.11103	0		110	T	0.11103	0		110	T	0.11103	0		110	T	0.0945951	0		110	T	0.0961239	0
111	E	0.137668	0		111	S	0.139597	0		111	A	0.118402	0		111	A	0.117952	0		111	A	0.118958	0		111	T	0.127603	0		111	T	0.127603	0		111	T	0.127603	0		111	A	0.1118	0		111	A	0.113967	0
112	K	0.122146	0		112	K	0.12728	0		112	K	0.104897	0		112	K	0.10455	0		112	K	0.104705	0		112	K	0.110267	0		112	K	0.110267	0		112	K	0.110267	0		112	K	0.100977	0		112	K	0.102102	0
113	L	0.116681	0		113	L	0.12526	0		113	L	0.0994488	0		113	L	0.0992795	0		113	L	0.10018	0		113	L	0.10666	0		113	L	0.10666	0		113	L	0.10666	0		113	L	0.0982193	0		113	L	0.0978859	0
114	E	0.134194	0		114	L	0.145727	0		114	E	0.116038	0		114	E	0.115822	0		114	E	0.117974	0		114	A	0.12589	0		114	A	0.12589	0		114	A	0.12589	0		114	A	0.115475	0		114	A	0.115387	0
115	E	0.135038	0		115	E	0.141452	0		115	E	0.115081	0		115	E	0.115087	0		115	E	0.117434	0		115	E	0.120687	0		115	E	0.120687	0		115	E	0.120687	0		115	E	0.111648	0		115	E	0.110878	0
116	A	0.117179	0		116	A	0.125853	0		116	A	0.105443	0		116	A	0.10524	0		116	A	0.107985	0		116	A	0.106119	0		116	A	0.106119	0		116	A	0.106119	0		116	A	0.100548	0		116	A	0.0993655	0
117	T	0.122597	0		117	T	0.131544	0		117	S	0.110765	0		117	S	0.110405	0		117	S	0.113678	0		117	S	0.109555	0		117	S	0.109555	0		117	S	0.109555	0		117	S	0.103695	0		117	S	0.103113	0
118	H	0.139797	0		118	Q	0.150051	1		118	Q	0.128641	0		118	Q	0.128196	0		118	H	0.131701	0		118	Q	0.126819	0		118	Q	0.126819	0		118	Q	0.126819	0		118	Q	0.119135	0		118	Q	0.119959	0
119	T	0.123564	0		119	S	0.132285	0		119	S	0.1153	0		119	S	0.11495	0		119	S	0.118614	0		119	A	0.117322	0		119	A	0.117322	0		119	A	0.117322	0		119	A	0.110743	0		119	A	0.111489	0
120	A	0.111759	0		120	A	0.124145	0		120	A	0.105555	0		120	A	0.104907	0		120	A	0.107131	0		120	A	0.107912	0		120	A	0.107912	0		120	A	0.107912	0		120	V	0.101028	0		120	A	0.100783	0
121	D	0.136835	0		121	D	0.148446	0		121	D	0.128468	0		121	D	0.127343	0		121	D	0.129785	0		121	D	0.129994	0		121	D	0.129994	0		121	D	0.129994	0		121	D	0.124355	0		121	D	0.124412	0
122	E	0.137222	0		122	E	0.156063	1		122	E	0.130961	0		122	E	0.12962	0		122	E	0.132612	0		122	E	0.132174	0		122	E	0.132174	0		122	E	0.132174	0		122	E	0.122684	0		122	E	0.124956	0
123	S	0.120313	0		123	N	0.134421	0		123	S	0.115712	0		123	S	0.114488	0		123	S	0.11633	0		123	S	0.113721	0		123	S	0.113721	0		123	S	0.113721	0		123	S	0.106807	0		123	S	0.108583	0
124	E	0.128329	0		124	N	0.144344	0		124	E	0.126099	0		124	E	0.124842	0		124	E	0.126974	0		124	E	0.126172	0		124	E	0.126172	0		124	E	0.126172	0		124	E	0.119459	0		124	E	0.121412	0
125	R	0.143552	0		125	R	0.15739	1		125	R	0.143149	0		125	R	0.141922	0		125	R	0.144363	0		125	R	0.141728	0		125	R	0.141728	0		125	R	0.141728	0		125	R	0.134372	0		125	R	0.137252	0
126	V	0.129724	0		126	M	0.143863	0		126	M	0.132448	0		126	M	0.131283	0		126	M	0.133244	0		126	M	0.131539	0		126	M	0.131539	0		126	M	0.131539	0		126	A	0.124012	0		126	A	0.126724	0
127	R	0.123001	0		127	C	0.140676	0		127	R	0.12921	0		127	R	0.12779	0		127	R	0.129505	0		127	R	0.128111	0		127	R	0.128111	0		127	R	0.128111	0		127	R	0.120993	0		127	R	0.122906	0
128	K	0.137773	0		128	K	0.155958	1		128	K	0.141405	0		128	K	0.139581	0		128	K	0.141704	0		128	K	0.141634	0		128	K	0.141634	0		128	K	0.141634	0		128	K	0.131139	0		128	K	0.132322	0
129	V	0.145234	0		129	V	0.163808	1		129	M	0.149163	0		129	M	0.147539	0		129	M	0.15026	1		129	V	0.149726	0		129	V	0.149726	0		129	V	0.149726	0		129	I	0.135284	0		129	I	0.136968	0
130	M	0.120679	0		130	L	0.142884	0		130	L	0.129833	0		130	L	0.128603	0		130	L	0.130924	0		130	L	0.130419	0		130	L	0.130419	0		130	L	0.130419	0		130	L	0.112748	0		130	L	0.114829	0
131	E	0.130136	0		131	E	0.144973	0		131	E	0.140421	0		131	E	0.13872	0		131	E	0.140642	0		131	E	0.138848	0		131	E	0.138848	0		131	E	0.138848	0		131	E	0.12443	0		131	E	0.125631	0
132	N	0.149949	0		132	N	0.165762	1		132	H	0.152913	1		132	H	0.150996	1		132	H	0.153138	1		132	N	0.151019	1		132	N	0.151019	1		132	N	0.151019	1		132	S	0.132536	0		132	S	0.134624	0
133	R	0.133531	0		133	R	0.152397	1		133	R	0.139587	0		133	R	0.137509	0		133	R	0.13895	0		133	R	0.136863	0		133	R	0.136863	0		133	R	0.136863	0		133	K	0.11852	0		133	K	0.120674	0
134	S	0.126108	0		134	S	0.152467	1		134	S	0.13295	0		134	S	0.131495	0		134	S	0.133105	0		134	S	0.133817	0		134	S	0.133817	0		134	S	0.133817	0		134	G	0.115297	0		134	G	0.116605	0
135	F	0.147773	0		135	Q	0.169943	1		135	I	0.149232	0		135	I	0.148187	0		135	I	0.150532	1		135	L	0.152911	1		135	L	0.152911	1		135	L	0.152911	1		135	L	0.131875	0		135	L	0.133459	0
136	Q	0.15773	1		136	Q	0.176977	1		136	T	0.153542	1		136	T	0.152804	1		136	T	0.155589	1		136	S	0.158083	1		136	S	0.158083	1		136	S	0.158083	1		136	A	0.136902	0		136	A	0.138408	0
137	D	0.139442	0		137	D	0.160242	1		137	D	0.137591	0		137	D	0.137367	0		137	D	0.139775	0		137	D	0.141482	0		137	D	0.141482	0		137	D	0.141482	0		137	D	0.124658	0		137	D	0.125838	0
138	E	0.139968	0		138	E	0.157812	1		138	E	0.141618	0		138	E	0.139038	0		138	E	0.142112	0		138	E	0.141002	0		138	E	0.141002	0		138	E	0.141002	0		138	E	0.126691	0		138	E	0.127998	0
139	E	0.156965	1		139	E	0.173075	1		139	E	0.153682	1		139	E	0.150973	1		139	E	0.154569	1		139	E	0.150719	1		139	E	0.150719	1		139	E	0.150719	1		139	E	0.136758	0		139	E	0.138165	0
140	R	0.142292	0		140	R	0.157935	1		140	R	0.137475	0		140	R	0.135394	0		140	R	0.139106	0		140	R	0.135002	0		140	R	0.135002	0		140	R	0.135002	0		140	R	0.121892	0		140	R	0.123061	0
141	A	0.132387	0		141	M	0.152424	1		141	M	0.140771	0		141	M	0.139129	0		141	M	0.142898	0		141	M	0.138962	0		141	M	0.138962	0		141	M	0.138962	0		141	M	0.129211	0		141	M	0.129484	0
142	N	0.148248	0		142	D	0.167325	1		142	E	0.154474	1		142	D	0.152874	1		142	D	0.154661	1		142	D	0.153058	1		142	D	0.153058	1		142	D	0.153058	1		142	D	0.141536	0		142	D	0.142032	0
143	T	0.153896	1		143	Q	0.16665	1		143	G	0.153762	1		143	G	0.151476	1		143	G	0.153541	1		143	A	0.150525	1		143	A	0.150525	1		143	A	0.150525	1		143	A	0.138345	0		143	A	0.139438	0
144	V	0.131739	0		144	L	0.145788	0		144	L	0.134194	0		144	L	0.131555	0		144	L	0.132909	0		144	L	0.128147	0		144	L	0.128147	0		144	L	0.128147	0		144	L	0.119367	0		144	L	0.120028	0
145	E	0.131365	0		145	S	0.144471	0		145	E	0.136286	0		145	E	0.133467	0		145	E	0.134583	0		145	E	0.129393	0		145	E	0.129393	0		145	E	0.129393	0		145	E	0.121279	0		145	E	0.121189	0
146	S	0.153545	1		146	N	0.166614	1		146	N	0.156243	1		146	N	0.152896	1		146	S	0.153475	1		146	N	0.150651	1		146	N	0.150651	1		146	N	0.150651	1		146	N	0.138653	0		146	N	0.139225	0
147	Q	0.136622	0		147	Q	0.149887	0		147	Q	0.135653	0		147	Q	0.134684	0		147	Q	0.134252	0		147	Q	0.13462	0		147	Q	0.13462	0		147	Q	0.13462	0		147	Q	0.123709	0		147	Q	0.124016	0
148	L	0.131073	0		148	L	0.147568	0		148	L	0.134236	0		148	L	0.13357	0		148	L	0.132946	0		148	L	0.136462	0		148	L	0.136462	0		148	L	0.136462	0		148	L	0.124574	0		148	L	0.124618	0
149	K	0.14622	0		149	K	0.164248	1		149	K	0.148994	0		149	K	0.148281	0		149	K	0.148085	0		149	K	0.152677	1		149	K	0.152677	1		149	K	0.152677	1		149	K	0.138465	0		149	K	0.139224	0
150	E	0.148259	0		150	E	0.162838	1		150	E	0.141166	0		150	E	0.140507	0		150	E	0.14036	0		150	E	0.14803	0		150	E	0.14803	0		150	E	0.14803	0		150	E	0.130896	0		150	E	0.131924	0
151	A	0.131435	0		151	A	0.14469	0		151	A	0.123849	0		151	A	0.123394	0		151	A	0.125369	0		151	A	0.130901	0		151	A	0.130901	0		151	A	0.130901	0		151	A	0.115076	0		151	A	0.115935	0
152	Q	0.134487	0		152	R	0.149894	0		152	R	0.128717	0		152	R	0.128122	0		152	R	0.129784	0		152	R	0.136693	0		152	R	0.136693	0		152	R	0.136693	0		152	R	0.118398	0		152	R	0.119431	0
153	M	0.150179	1		153	M	0.168328	1		153	M	0.142336	0		153	M	0.141828	0		153	M	0.144198	0		153	F	0.15569	1		153	F	0.15569	1		153	F	0.15569	1		153	F	0.136613	0		153	F	0.137742	0
154	L	0.131619	0		154	L	0.149792	0		154	M	0.123457	0		154	M	0.12313	0		154	M	0.125263	0		154	L	0.13727	0		154	L	0.13727	0		154	L	0.13727	0		154	M	0.118794	0		154	M	0.120438	0
155	A	0.119731	0		155	A	0.140081	0		155	A	0.110976	0		155	A	0.111072	0		155	A	0.114108	0		155	A	0.126455	0		155	A	0.126455	0		155	A	0.126455	0		155	A	0.108766	0		155	A	0.109974	0
156	E	0.139428	0		156	E	0.157865	1		156	E	0.131781	0		156	E	0.131621	0		156	E	0.134844	0		156	E	0.146734	0		156	E	0.146734	0		156	E	0.146734	0		156	E	0.122863	0		156	E	0.124365	0
157	E	0.140064	0		157	D	0.15628	1		157	D	0.132026	0		157	D	0.131703	0		157	D	0.134747	0		157	E	0.145665	0		157	E	0.145665	0		157	E	0.145665	0		157	E	0.123266	0		157	E	0.12475	0
158	A	0.12404	0		158	A	0.138398	0		158	A	0.115991	0		158	A	0.115835	0		158	A	0.118449	0		158	A	0.129553	0		158	A	0.129553	0		158	A	0.129553	0		158	A	0.108272	0		158	A	0.109236	0
159	D	0.128365	0		159	D	0.142565	0		159	D	0.123216	0		159	D	0.122881	0		159	D	0.125975	0		159	D	0.135639	0		159	D	0.135639	0		159	D	0.135639	0		159	D	0.116344	0		159	D	0.117037	0
160	R	0.142966	0		160	G	0.157462	1		160	R	0.139151	0		160	R	0.138678	0		160	R	0.142662	0		160	R	0.152955	1		160	R	0.152955	1		160	R	0.152955	1		160	K	0.131292	0		160	K	0.132449	0
161	K	0.130003	0		161	K	0.142194	0		161	K	0.127884	0		161	K	0.127398	0		161	K	0.130927	0		161	K	0.139933	0		161	K	0.139933	0		161	K	0.139933	0		161	K	0.122091	0		161	K	0.122761	0
162	Y	0.123838	0		162	S	0.132622	0		162	Y	0.124838	0		162	Y	0.124242	0		162	Y	0.127453	0		162	Y	0.132281	0		162	Y	0.132281	0		162	Y	0.132281	0		162	Y	0.113565	0		162	Y	0.114416	0
163	D	0.147584	0		163	D	0.154294	1		163	D	0.148558	0		163	D	0.147827	0		163	D	0.151176	1		163	D	0.155703	1		163	D	0.155703	1		163	D	0.155703	1		163	D	0.136044	0		163	D	0.136626	0
164	E	0.150391	1		164	E	0.152433	1		164	E	0.154022	1		164	E	0.153197	1		164	E	0.156397	1		164	E	0.15722	1		164	E	0.15722	1		164	E	0.15722	1		164	E	0.140116	0		164	E	0.140802	0
165	V	0.131659	0		165	V	0.135381	0		165	V	0.134667	0		165	V	0.1341	0		165	V	0.13711	0		165	V	0.137817	0		165	V	0.137817	0		165	V	0.137817	0		165	V	0.127197	0		165	V	0.127618	0
166	A	0.135463	0		166	S	0.137266	0		166	A	0.137625	0		166	A	0.137372	0		166	A	0.141229	0		166	A	0.141529	0		166	A	0.141529	0		166	A	0.141529	0		166	A	0.13153	0		166	A	0.13191	0
167	R	0.155271	1		167	R	0.155709	1		167	R	0.159011	1		167	R	0.1588	1		167	R	0.163553	1		167	R	0.162719	1		167	R	0.162719	1		167	R	0.162719	1		167	R	0.153121	1		167	R	0.153736	1
168	K	0.138807	0		168	K	0.139424	0		168	K	0.143613	0		168	K	0.143262	0		168	K	0.146988	0		168	K	0.145332	0		168	K	0.145332	0		168	K	0.145332	0		168	K	0.136634	0		168	K	0.137458	0
169	L	0.139593	0		169	L	0.141814	0		169	L	0.143734	0		169	L	0.143343	0		169	L	0.146729	0		169	L	0.144394	0		169	L	0.144394	0		169	L	0.144394	0		169	L	0.137516	0		169	L	0.138198	0
170	A	0.14991	0		170	A	0.159249	1		170	A	0.155248	1		170	A	0.154721	1		170	A	0.158231	1		170	A	0.156237	1		170	A	0.156237	1		170	A	0.156237	1		170	A	0.147624	0		170	A	0.148893	0
171	M	0.149419	0		171	F	0.165256	1		171	M	0.155347	1		171	M	0.154871	1		171	M	0.158504	1		171	M	0.155628	1		171	M	0.155628	1		171	M	0.155628	1		171	M	0.1487	0		171	M	0.150266	1
172	V	0.124244	0		172	V	0.141354	0		172	V	0.130113	0		172	V	0.129807	0		172	V	0.133253	0		172	V	0.13051	0		172	V	0.13051	0		172	V	0.13051	0		172	V	0.124797	0		172	V	0.126666	0
173	E	0.12924	0		173	E	0.14682	0		173	E	0.135557	0		173	E	0.13523	0		173	E	0.139	0		173	E	0.136655	0		173	E	0.136655	0		173	E	0.136655	0		173	E	0.129732	0		173	E	0.131993	0
174	A	0.151357	1		174	D	0.1609	1		174	A	0.158018	1		174	A	0.157521	1		174	A	0.161727	1		174	A	0.159298	1		174	A	0.159298	1		174	A	0.159298	1		174	A	0.150834	1		174	A	0.153591	1
175	D	0.13334	0		175	E	0.14356	0		175	D	0.139136	0		175	D	0.138348	0		175	D	0.141592	0		175	D	0.140554	0		175	D	0.140554	0		175	D	0.140554	0		175	D	0.132422	0		175	D	0.135095	0
176	L	0.120634	0		176	L	0.139213	0		176	L	0.127234	0		176	L	0.126011	0		176	L	0.128474	0		176	L	0.127818	0		176	L	0.127818	0		176	L	0.127818	0		176	L	0.119899	0		176	L	0.122522	0
177	E	0.135104	0		177	E	0.154356	1		177	E	0.142641	0		177	E	0.141224	0		177	E	0.143927	0		177	E	0.143493	0		177	E	0.143493	0		177	E	0.143493	0		177	E	0.13414	0		177	E	0.137039	0
178	R	0.136489	0		178	V	0.152753	1		178	R	0.142471	0		178	R	0.141298	0		178	R	0.143715	0		178	R	0.142851	0		178	R	0.142851	0		178	R	0.142851	0		178	R	0.133819	0		178	R	0.13663	0
179	A	0.121496	0		179	A	0.131979	0		179	A	0.126345	0		179	A	0.125464	0		179	A	0.127747	0		179	A	0.126585	0		179	A	0.126585	0		179	A	0.126585	0		179	A	0.119395	0		179	A	0.121591	0
180	E	0.129217	0		180	E	0.131218	0		180	E	0.134346	0		180	E	0.133591	0		180	E	0.136152	0		180	E	0.134348	0		180	E	0.134348	0		180	E	0.134348	0		180	E	0.124587	0		180	E	0.127751	0
181	E	0.141706	0		181	D	0.14478	0		181	E	0.150157	1		181	E	0.14947	0		181	E	0.151721	1		181	E	0.150806	1		181	E	0.150806	1		181	E	0.150806	1		181	E	0.1387	0		181	E	0.142636	0
182	R	0.125651	0		182	R	0.130499	0		182	R	0.132988	0		182	R	0.132353	0		182	R	0.134273	0		182	R	0.133908	0		182	R	0.133908	0		182	R	0.133908	0		182	R	0.123663	0		182	R	0.126712	0
183	A	0.110208	0		183	V	0.125713	0		183	A	0.116675	0		183	A	0.116068	0		183	A	0.11807	0		183	A	0.117804	0		183	A	0.117804	0		183	A	0.117804	0		183	A	0.109368	0		183	A	0.111483	0
184	E	0.12911	0		184	K	0.137364	0		184	E	0.133586	0		184	E	0.132734	0		184	E	0.134257	0		184	E	0.133722	0		184	E	0.133722	0		184	E	0.133722	0		184	E	0.123566	0		184	E	0.126246	0
185	A	0.13263	0		185	S	0.13463	0		185	T	0.135484	0		185	T	0.134907	0		185	T	0.13614	0		185	T	0.135676	0		185	T	0.135676	0		185	T	0.135676	0		185	S	0.125588	0		185	T	0.128242	0
186	G	0.116431	0		186	G	0.117666	0		186	G	0.118417	0		186	G	0.118123	0		186	G	0.119304	0		186	G	0.118561	0		186	G	0.118561	0		186	G	0.118561	0		186	G	0.109719	0		186	G	0.112037	0
187	E	0.116742	0		187	E	0.115483	0		187	E	0.118582	0		187	E	0.118113	0		187	E	0.118894	0		187	E	0.11792	0		187	E	0.11792	0		187	E	0.11792	0		187	E	0.108149	0		187	E	0.110444	0
188	N	0.136583	0		188	A	0.134205	0		188	S	0.140196	0		188	S	0.13976	0		188	T	0.141339	0		188	S	0.140292	0		188	S	0.140292	0		188	S	0.140292	0		188	S	0.12888	0		188	S	0.131572	0
189	K	0.121248	0		189	K	0.121727	0		189	K	0.123577	0		189	K	0.123039	0		189	K	0.123879	0		189	K	0.123677	0		189	K	0.123677	0		189	K	0.123677	0		189	K	0.115013	0		189	K	0.116158	0
190	I	0.123521	0		190	I	0.123728	0		190	I	0.122897	0		190	I	0.122323	0		190	I	0.12446	0		190	I	0.123856	0		190	I	0.123856	0		190	I	0.123856	0		190	I	0.116616	0		190	I	0.117018	0
191	V	0.145142	0		191	M	0.143206	0		191	V	0.144632	0		191	V	0.143834	0		191	V	0.145679	0		191	V	0.14512	0		191	V	0.14512	0		191	V	0.14512	0		191	V	0.137135	0		191	V	0.13803	0
192	E	0.154323	1		192	E	0.14706	0		192	E	0.153816	1		192	E	0.153036	1		192	E	0.154666	1		192	E	0.15445	1		192	E	0.15445	1		192	E	0.15445	1		192	E	0.145683	0		192	E	0.146821	0
193	L	0.13861	0		193	L	0.138454	0		193	L	0.140378	0		193	L	0.139838	0		193	L	0.141843	0		193	L	0.141814	0		193	L	0.141814	0		193	L	0.141814	0		193	L	0.13452	0		193	L	0.135136	0
194	E	0.150211	1		194	E	0.14467	0		194	E	0.152293	1		194	E	0.151657	1		194	E	0.154416	1		194	E	0.153799	1		194	E	0.153799	1		194	E	0.153799	1		194	E	0.146522	0		194	E	0.147091	0
195	E	0.167896	1		195	E	0.163772	1		195	E	0.169981	1		195	E	0.16968	1		195	E	0.17302	1		195	E	0.172081	1		195	E	0.172081	1		195	E	0.172081	1		195	E	0.164652	1		195	E	0.164721	1
196	E	0.152864	1		196	E	0.151591	1		196	E	0.156341	1		196	E	0.155952	1		196	E	0.159457	1		196	E	0.159151	1		196	E	0.159151	1		196	E	0.159151	1		196	E	0.152977	1		196	E	0.152856	1
197	L	0.1511	1		197	L	0.150905	1		197	L	0.153823	1		197	L	0.153282	1		197	L	0.156188	1		197	L	0.155451	1		197	L	0.155451	1		197	L	0.155451	1		197	L	0.150648	1		197	L	0.149852	0
198	R	0.1679	1		198	K	0.16874	1		198	R	0.171026	1		198	R	0.170542	1		198	R	0.174127	1		198	R	0.173487	1		198	R	0.173487	1		198	R	0.173487	1		198	R	0.168276	1		198	R	0.167114	1
199	V	0.167898	1		199	V	0.165184	1		199	V	0.170826	1		199	V	0.170391	1		199	V	0.173301	1		199	V	0.171736	1		199	V	0.171736	1		199	V	0.171736	1		199	V	0.167322	1		199	V	0.16594	1
200	V	0.145712	0		200	V	0.145476	0		200	V	0.14932	0		200	V	0.14919	0		200	V	0.152071	1		200	V	0.150922	1		200	V	0.150922	1		200	V	0.150922	1		200	V	0.146684	0		200	V	0.145089	0
201	G	0.149156	0		201	G	0.153163	1		201	G	0.154363	1		201	G	0.153819	1		201	G	0.156664	1		201	G	0.154977	1		201	G	0.154977	1		201	G	0.154977	1		201	G	0.151605	1		201	G	0.14966	0
202	N	0.162917	1		202	N	0.165842	1		202	N	0.167815	1		202	N	0.167136	1		202	N	0.170671	1		202	N	0.168352	1		202	N	0.168352	1		202	N	0.168352	1		202	N	0.164278	1		202	N	0.161832	1
203	N	0.140646	0		203	S	0.148268	0		203	N	0.145825	0		203	N	0.145312	0		203	N	0.148037	0		203	N	0.146777	0		203	N	0.146777	0		203	N	0.146777	0		203	N	0.142465	0		203	N	0.139841	0
204	L	0.138161	0		204	L	0.144059	0		204	L	0.143589	0		204	L	0.142354	0		204	L	0.144773	0		204	L	0.144197	0		204	L	0.144197	0		204	L	0.144197	0		204	L	0.13889	0		204	L	0.136658	0
205	K	0.152005	1		205	K	0.160808	1		205	K	0.157737	1		205	K	0.156793	1		205	K	0.159436	1		205	K	0.157935	1		205	K	0.157935	1		205	K	0.157935	1		205	K	0.152868	1		205	K	0.150716	1
206	S	0.144945	0		206	S	0.151186	1		206	S	0.149449	0		206	S	0.148619	0		206	S	0.150851	1		206	S	0.148654	0		206	S	0.148654	0		206	S	0.148654	0		206	S	0.143579	0		206	S	0.141558	0
207	L	0.131132	0		207	L	0.134328	0		207	L	0.13443	0		207	L	0.133685	0		207	L	0.135383	0		207	L	0.133552	0		207	L	0.133552	0		207	L	0.133552	0		207	L	0.128078	0		207	L	0.126151	0
208	E	0.137793	0		208	E	0.138246	0		208	E	0.139359	0		208	E	0.137939	0		208	E	0.139714	0		208	E	0.139082	0		208	E	0.139082	0		208	E	0.139082	0		208	E	0.133763	0		208	E	0.132002	0
209	V	0.15612	1		209	V	0.154948	1		209	V	0.156937	1		209	V	0.15581	1		209	V	0.157865	1		209	V	0.157029	1		209	V	0.157029	1		209	V	0.157029	1		209	V	0.150947	1		209	V	0.149212	0
210	S	0.136967	0		210	S	0.13321	0		210	S	0.136437	0		210	S	0.135698	0		210	S	0.137529	0		210	S	0.13694	0		210	S	0.13694	0		210	S	0.13694	0		210	S	0.130435	0		210	S	0.129016	0
211	E	0.133602	0		211	E	0.128948	0		211	E	0.134681	0		211	E	0.133898	0		211	E	0.135336	0		211	E	0.133996	0		211	E	0.133996	0		211	E	0.133996	0		211	E	0.126839	0		211	E	0.125927	0
212	E	0.151866	1		212	D	0.147747	0		212	E	0.151534	1		212	E	0.151088	1		212	E	0.153041	1		212	E	0.151093	1		212	E	0.151093	1		212	E	0.151093	1		212	E	0.143325	0		212	E	0.142749	0
213	K	0.155871	1		213	K	0.151176	1		213	K	0.153983	1		213	K	0.153834	1		213	K	0.154879	1		213	K	0.150629	1		213	K	0.150629	1		213	K	0.150629	1		213	K	0.143533	0		213	K	0.142416	0
214	A	0.143538	0		214	A	0.132383	0		214	A	0.141778	0		214	A	0.141297	0		214	A	0.141945	0		214	A	0.138667	0		214	A	0.138667	0		214	A	0.138667	0		214	A	0.130385	0		214	A	0.128865	0
215	L	0.150197	1		215	N	0.145548	0		215	Q	0.150891	1		215	Q	0.150201	1		215	Q	0.151687	1		215	N	0.150153	1		215	N	0.150153	1		215	N	0.150153	1		215	N	0.14103	0		215	N	0.139876	0
216	Q	0.16107	1		216	Q	0.163652	1		216	Q	0.162063	1		216	Q	0.161623	1		216	Q	0.163052	1		216	Q	0.159809	1		216	Q	0.159809	1		216	Q	0.159809	1		216	L	0.156056	1		216	L	0.154562	1
217	R	0.144584	0		217	R	0.151887	1		217	R	0.148166	0		217	R	0.147304	0		217	R	0.14856	0		217	R	0.142451	0		217	R	0.142451	0		217	R	0.142451	0		217	R	0.138092	0		217	R	0.136421	0
218	E	0.140182	0		218	V	0.148399	0		218	E	0.142827	0		218	E	0.142536	0		218	E	0.143916	0		218	E	0.135292	0		218	E	0.135292	0		218	E	0.135292	0		218	E	0.131954	0		218	E	0.129591	0
219	D	0.160571	1		219	E	0.172474	1		219	E	0.164313	1		219	E	0.1642	1		219	E	0.164803	1		219	E	0.15365	1		219	E	0.15365	1		219	E	0.15365	1		219	E	0.152146	1		219	E	0.149072	0
220	S	0.169729	1		220	E	0.178117	1		220	A	0.171181	1		220	A	0.172395	1		220	A	0.172406	1		220	A	0.160411	1		220	A	0.160411	1		220	A	0.160411	1		220	E	0.159302	1		220	E	0.154105	1
221	Y	0.151472	1		221	F	0.159263	1		221	H	0.153659	1		221	Y	0.154598	1		221	Y	0.154218	1		221	Y	0.141046	0		221	Y	0.141046	0		221	Y	0.141046	0		221	Y	0.141221	0		221	Y	0.135606	0
222	E	0.157779	1		222	K	0.165516	1		222	E	0.161163	1		222	E	0.162188	1		222	E	0.16204	1		222	K	0.146143	0		222	K	0.146143	0		222	K	0.146143	0		222	K	0.146636	0		222	K	0.140842	0
223	E	0.170887	1		223	R	0.181668	1		223	Q	0.173646	1		223	Q	0.175323	1		223	Q	0.175979	1		223	E	0.153823	1		223	E	0.153823	1		223	E	0.153823	1		223	Q	0.159369	1		223	Q	0.153142	1
224	Q	0.15753	1		224	Q	0.162194	1		224	Q	0.157425	1		224	Q	0.159676	1		224	Q	0.159579	1		224	Q	0.135753	0		224	Q	0.135753	0		224	Q	0.135753	0		224	Q	0.142982	0		224	Q	0.13601	0
225	I	0.153989	1		225	L	0.157617	1		225	I	0.155641	1		225	I	0.157599	1		225	I	0.158084	1		225	I	0.135935	0		225	I	0.135935	0		225	I	0.135935	0		225	I	0.138081	0		225	I	0.132691	0
226	R	0.161828	1		226	K	0.171855	1		226	R	0.164472	1		226	R	0.165986	1		226	R	0.167861	1		226	K	0.149822	0		226	K	0.149822	0		226	K	0.149822	0		226	K	0.149526	0		226	K	0.142926	0
227	T	0.16284	1		227	S	0.167496	1		227	I	0.162507	1		227	I	0.163194	1		227	M	0.164461	1		227	T	0.148356	0		227	T	0.148356	0		227	T	0.148356	0		227	T	0.15074	1		227	T	0.144125	0
228	V	0.14173	0		228	L	0.143319	0		228	M	0.139756	0		228	M	0.140499	0		228	M	0.142289	0		228	L	0.1288	0		228	L	0.1288	0		228	L	0.1288	0		228	L	0.129937	0		228	L	0.124058	0
229	S	0.13931	0		229	T	0.146474	0		229	T	0.13795	0		229	T	0.13755	0		229	T	0.14022	0		229	T	0.131329	0		229	T	0.131329	0		229	T	0.131329	0		229	T	0.131285	0		229	N	0.126197	0
230	A	0.160271	1		230	I	0.16799	1		230	T	0.158607	1		230	A	0.15838	1		230	G	0.161452	1		230	N	0.148033	0		230	N	0.148033	0		230	N	0.148033	0		230	T	0.154321	1		230	T	0.148783	0
231	R	0.134502	0		231	K	0.14301	0		231	K	0.132885	0		231	K	0.132805	0		231	K	0.136083	0		231	K	0.127271	0		231	K	0.127271	0		231	K	0.127271	0		231	R	0.134016	0		231	R	0.129278	0
232	L	0.129597	0		232	L	0.140424	0		232	L	0.126524	0		232	L	0.126301	0		232	L	0.12841	0		232	L	0.126	0		232	L	0.126	0		232	L	0.126	0		232	L	0.128904	0		232	L	0.124186	0
233	K	0.144779	0		233	K	0.155126	1		233	K	0.138406	0		233	K	0.137856	0		233	K	0.140068	0		233	K	0.138644	0		233	K	0.138644	0		233	K	0.138644	0		233	K	0.142801	0		233	K	0.137947	0
234	E	0.151258	1		234	E	0.157645	1		234	E	0.143514	0		234	E	0.142929	0		234	E	0.144292	0		234	A	0.142201	0		234	A	0.142201	0		234	A	0.142201	0		234	E	0.148917	0		234	E	0.142353	0
235	A	0.137043	0		235	A	0.137724	0		235	A	0.127334	0		235	A	0.128302	0		235	A	0.128236	0		235	A	0.12417	0		235	A	0.12417	0		235	A	0.12417	0		235	A	0.134012	0		235	A	0.128665	0
236	E	0.136412	0		236	E	0.140728	0		236	E	0.12805	0		236	E	0.128662	0		236	E	0.129978	0		236	E	0.1273	0		236	E	0.1273	0		236	E	0.1273	0		236	E	0.134899	0		236	E	0.128888	0
237	T	0.155111	1		237	T	0.161661	1		237	A	0.147085	0		237	A	0.147655	0		237	A	0.15059	1		237	A	0.14841	0		237	A	0.14841	0		237	A	0.14841	0		237	A	0.156537	1		237	A	0.149457	0
238	R	0.136719	0		238	R	0.142645	0		238	R	0.12869	0		238	R	0.129469	0		238	R	0.131804	0		238	R	0.127728	0		238	R	0.127728	0		238	R	0.127728	0		238	R	0.138196	0		238	R	0.132196	0
239	A	0.120311	0		239	A	0.128158	0		239	A	0.112348	0		239	A	0.113256	0		239	A	0.114635	0		239	A	0.117523	0		239	A	0.117523	0		239	A	0.117523	0		239	A	0.122305	0		239	A	0.11605	0
240	E	0.141455	0		240	E	0.146588	0		240	E	0.132466	0		240	E	0.133142	0		240	E	0.135759	0		240	E	0.138445	0		240	E	0.138445	0		240	E	0.138445	0		240	E	0.142201	0		240	E	0.13578	0
241	F	0.138705	0		241	N	0.144449	0		241	F	0.130753	0		241	F	0.130706	0		241	F	0.134575	0		241	F	0.137099	0		241	F	0.137099	0		241	F	0.137099	0		241	F	0.140755	0		241	F	0.134534	0
242	A	0.120637	0		242	A	0.127452	0		242	A	0.116514	0		242	A	0.116758	0		242	A	0.120736	0		242	A	0.123158	0		242	A	0.123158	0		242	A	0.123158	0		242	A	0.125295	0		242	A	0.119506	0
243	E	0.122247	0		243	E	0.129321	0		243	E	0.11873	0		243	E	0.117675	0		243	E	0.124122	0		243	E	0.125436	0		243	E	0.125436	0		243	E	0.125436	0		243	E	0.125538	0		243	E	0.119876	0
244	R	0.141095	0		244	K	0.150451	1		244	R	0.138266	0		244	R	0.136905	0		244	R	0.143136	0		244	R	0.145605	0		244	R	0.145605	0		244	R	0.145605	0		244	R	0.145779	0		244	R	0.139963	0
245	S	0.12734	0		245	N	0.136316	0		245	S	0.127041	0		245	S	0.125681	0		245	S	0.130798	0		245	S	0.132602	0		245	S	0.132602	0		245	S	0.132602	0		245	S	0.132664	0		245	S	0.127835	0
246	V	0.123424	0		246	V	0.128899	0		246	V	0.123872	0		246	V	0.122041	0		246	V	0.124908	0		246	V	0.127533	0		246	V	0.127533	0		246	V	0.127533	0		246	V	0.127186	0		246	V	0.122824	0
247	Q	0.141638	0		247	K	0.147116	0		247	Q	0.142337	0		247	Q	0.139136	0		247	R	0.142741	0		247	Q	0.145352	0		247	Q	0.145352	0		247	Q	0.145352	0		247	Q	0.14468	0		247	Q	0.139831	0
248	K	0.146735	0		248	K	0.150628	1		248	K	0.14795	0		248	K	0.143609	0		248	K	0.147936	0		248	K	0.14978	0		248	K	0.14978	0		248	K	0.14978	0		248	K	0.149124	0		248	K	0.144948	0
249	L	0.126478	0		249	L	0.132446	0		249	L	0.12901	0		249	L	0.124459	0		249	L	0.127773	0		249	L	0.129741	0		249	L	0.129741	0		249	L	0.129741	0		249	L	0.130529	0		249	L	0.126528	0
250	Q	0.137306	0		250	Q	0.139283	0		250	Q	0.136313	0		250	Q	0.135131	0		250	Q	0.137493	0		250	Q	0.139371	0		250	Q	0.139371	0		250	Q	0.139371	0		250	Q	0.140848	0		250	Q	0.137079	0
251	K	0.156722	1		251	K	0.161101	1		251	K	0.157488	1		251	K	0.154489	1		251	K	0.15735	1		251	K	0.159073	1		251	K	0.159073	1		251	K	0.159073	1		251	K	0.160319	1		251	K	0.156564	1
252	E	0.137412	0		252	E	0.140942	0		252	E	0.137419	0		252	E	0.13544	0		252	E	0.135922	0		252	E	0.139086	0		252	E	0.139086	0		252	E	0.139086	0		252	E	0.140758	0		252	E	0.13769	0
253	V	0.140867	0		253	V	0.144604	0		253	V	0.139125	0		253	V	0.137724	0		253	V	0.138359	0		253	V	0.140485	0		253	V	0.140485	0		253	V	0.140485	0		253	V	0.142403	0		253	V	0.139623	0
254	D	0.157509	1		254	D	0.164631	1		254	G	0.155877	1		254	D	0.15348	1		254	D	0.15442	1		254	D	0.157238	1		254	D	0.157238	1		254	D	0.157238	1		254	D	0.160401	1		254	D	0.157036	1
255	R	0.151953	1		255	R	0.161557	1		255	R	0.148602	0		255	R	0.146339	0		255	R	0.14858	0		255	R	0.149933	0		255	R	0.149933	0		255	R	0.149933	0		255	R	0.153633	1		255	R	0.151139	1
256	L	0.133946	0		256	L	0.143964	0		256	L	0.130195	0		256	L	0.129055	0		256	L	0.130686	0		256	L	0.131778	0		256	L	0.131778	0		256	L	0.131778	0		256	L	0.135925	0		256	L	0.134349	0
257	E	0.13792	0		257	E	0.148495	0		257	E	0.132834	0		257	E	0.132322	0		257	E	0.134096	0		257	E	0.135602	0		257	E	0.135602	0		257	E	0.135602	0		257	E	0.139759	0		257	E	0.139045	0
258	D	0.155198	1		258	D	0.164918	1		258	D	0.149459	0		258	D	0.148656	0		258	D	0.150467	1		258	D	0.151257	1		258	D	0.151257	1		258	D	0.151257	1		258	D	0.155719	1		258	D	0.156095	1
259	E	0.138114	0		259	E	0.149218	0		259	E	0.136337	0		259	E	0.13244	0		259	E	0.134378	0		259	E	0.134714	0		259	E	0.134714	0		259	E	0.134714	0		259	E	0.139617	0		259	E	0.141386	0
260	L	0.128867	0		260	L	0.141588	0		260	L	0.12515	0		260	L	0.122461	0		260	L	0.123903	0		260	L	0.125498	0		260	L	0.125498	0		260	L	0.125498	0		260	L	0.130867	0		260	L	0.133238	0
261	V	0.146811	0		261	G	0.159555	1		261	V	0.141005	0		261	V	0.138224	0		261	V	0.140136	0		261	V	0.142372	0		261	V	0.142372	0		261	V	0.142372	0		261	V	0.14854	0		261	V	0.151073	1
262	H	0.143599	0		262	V	0.154638	1		262	H	0.134235	0		262	H	0.130892	0		262	H	0.132762	0		262	N	0.134249	0		262	N	0.134249	0		262	N	0.134249	0		262	H	0.143324	0		262	H	0.145744	0
263	E	0.128613	0		263	N	0.138113	0		263	E	0.119487	0		263	E	0.117245	0		263	E	0.118822	0		263	E	0.118931	0		263	E	0.118931	0		263	E	0.118931	0		263	E	0.127864	0		263	E	0.132106	0
264	K	0.132163	0		264	K	0.143672	0		264	K	0.124822	0		264	K	0.122463	0		264	K	0.123895	0		264	K	0.125041	0		264	K	0.125041	0		264	K	0.125041	0		264	K	0.132943	0		264	K	0.137221	0
265	E	0.14261	0		265	D	0.154597	1		265	E	0.1355	0		265	E	0.13335	0		265	E	0.135278	0		265	E	0.136758	0		265	E	0.136758	0		265	E	0.136758	0		265	E	0.15225	1		265	E	0.157081	1
266	R	0.131343	0		266	R	0.142551	0		266	K	0.126387	0		266	K	0.124429	0		266	K	0.125931	0		266	K	0.126723	0		266	K	0.126723	0		266	K	0.126723	0		266	K	0.143149	0		266	K	0.148051	0
267	Y	0.123514	0		267	Y	0.138171	0		267	Y	0.119727	0		267	Y	0.11835	0		267	Y	0.119714	0		267	Y	0.121524	0		267	Y	0.121524	0		267	Y	0.121524	0		267	Y	0.137687	0		267	Y	0.141955	0
268	K	0.138196	0		268	K	0.153778	1		268	K	0.131494	0		268	K	0.130182	0		268	K	0.131942	0		268	K	0.134352	0		268	K	0.134352	0		268	K	0.134352	0		268	K	0.149097	0		268	K	0.153107	1
269	S	0.143356	0		269	S	0.155538	1		269	S	0.136942	0		269	S	0.135779	0		269	S	0.137199	0		269	S	0.139259	0		269	S	0.139259	0		269	S	0.139259	0		269	F	0.149971	0		269	Y	0.154892	1
270	I	0.127222	0		270	L	0.142084	0		270	I	0.123816	0		270	I	0.12293	0		270	I	0.123687	0		270	I	0.125131	0		270	I	0.125131	0		270	I	0.125131	0		270	I	0.135778	0		270	I	0.142418	0
271	S	0.12686	0		271	A	0.141536	0		271	S	0.125722	0		271	S	0.124994	0		271	S	0.126145	0		271	T	0.129668	0		271	T	0.129668	0		271	T	0.129668	0		271	C	0.136246	0		271	C	0.142797	0
272	E	0.139243	0		272	D	0.149875	0		272	D	0.135922	0		272	D	0.135296	0		272	D	0.136951	0		272	D	0.141322	0		272	D	0.141322	0		272	D	0.141322	0		272	D	0.148174	0		272	D	0.154174	1
273	E	0.128342	0		273	E	0.13812	0		273	E	0.126427	0		273	E	0.126255	0		273	E	0.127462	0		273	E	0.130504	0		273	E	0.130504	0		273	E	0.130504	0		273	D	0.138799	0		273	D	0.147532	0
274	L	0.133633	0		274	M	0.142632	0		274	L	0.13183	0		274	L	0.131477	0		274	L	0.132187	0		274	L	0.135589	0		274	L	0.135589	0		274	L	0.135589	0		274	L	0.136579	0		274	L	0.143239	0
275	D	0.147332	0		275	D	0.148741	0		275	D	0.136257	0		275	D	0.135852	0		275	D	0.136956	0		275	D	0.142762	0		275	D	0.142762	0		275	D	0.142762	0		275	D	0.144524	0		275	D	0.152104	1
276	Q	0.154835	1		276	S	0.154687	1		276	Q	0.142771	0		276	Q	0.142232	0		276	Q	0.143547	0		276	Q	0.150024	1		276	Q	0.150024	1		276	Q	0.150024	1		276	M	0.151285	1		276	M	0.1572	1
277	T	0.140045	0		277	T	0.141155	0		277	T	0.13338	0		277	T	0.13294	0		277	T	0.133786	0		277	T	0.13957	0		277	T	0.13957	0		277	T	0.13957	0		277	T	0.1436	0		277	T	0.149954	0
278	F	0.141278	0		278	F	0.135364	0		278	F	0.131519	0		278	F	0.131324	0		278	F	0.132571	0		278	F	0.135408	0		278	F	0.135408	0		278	F	0.135408	0		278	F	0.14173	0		278	F	0.151583	1
279	Q	0.157025	1		279	A	0.145046	0		279	A	0.139789	0		279	A	0.139434	0		279	A	0.141212	0		279	S	0.14385	0		279	S	0.14385	0		279	S	0.14385	0		279	T	0.151163	1		279	T	0.157986	1
280	E	0.148095	0		280	E	0.135675	0		280	E	0.134636	0		280	E	0.134063	0		280	E	0.135212	0		280	E	0.135781	0		280	E	0.135781	0		280	E	0.135781	0		280	E	0.144542	0		280	E	0.153647	1
281	L	0.147897	0		281	L	0.11899	0		281	L	0.117055	0		281	L	0.11657	0		281	L	0.11723	0		281	L	0.11719	0		281	L	0.11719	0		281	L	0.11719	0		281	L	0.124618	0		281	L	0.133483	0
282	S	0.159065	1		282	A	0.110951	0		282	T	0.10944	0		282	T	0.108888	0		282	T	0.109687	0		282	S	0.110015	0		282	S	0.110015	0		282	S	0.110015	0		282	A	0.116229	0		282	I	0.122185	0
283	G	0.155328	1		283	G	0.0903266	0		283	G	0.0893527	0		283	G	0.0888592	0		283	G	0.089628	0		283	G	0.0890593	0		283	G	0.0890593	0		283	G	0.0890593	0		283	G	0.0949604	0		283	G	0.102252	0
284	Y	0.133835	0		284	Y	0.0757682	0		284	Y	0.0758904	0		284	Y	0.0754293	0		284	Y	0.0759031	0		284	Y	0.0730364	0		284	Y	0.0730364	0		284	Y	0.0730364	0		284	Y	0.0765842	0		284	N	0.0822221	0
285	R	0.112876	0		285	-		0		285	-		0		285	-		0		285	-		0		285	-		0		285	-		0		285	-		0		285	-		0		285	-		0
286	S	0.106637	0		286	-		0		286	-		0		286	-		0		286	-		0		286	-		0		286	-		0		286	-		0		286	-		0		286	-		0
287	D	0.0863721	0		287	-		0		287	-		0		287	-		0		287	-		0		287	-		0		287	-		0		287	-		0		287	-		0		287	-		0

## Sheet: AlgPred+BepiPred_matrix
Num	Asc l 3	AlgPred	Bepipred	AlgPred+BepiPred		Num	Aed a 10	AlgPred	Bepipred	AlgPred+BepiPred		Num	Der p 10	AlgPred	Bepipred	AlgPred+BepiPred		Num	Der f 10	AlgPred	Bepipred	AlgPred+BepiPred		Num	Blo t 10	AlgPred	Bepipred	AlgPred+BepiPred	BE_Blot10		Num	Lit v 1	AlgPred	Bepipred	AlgPred+BepiPred		Num	Pen m 1	AlgPred	Bepipred	AlgPred+BepiPred		Num	Pen a 1	AlgPred	Bepipred	AlgPred+BepiPred		Num
1	M	0	0	0		1	M	1	0	1		1	M	0	0	0		1	M	0	0	0		1	M	0	0	0	0		1	M	1	0	1		1	M	1	0	1		1	M	1	0	1		1
2	D	0	0	0		2	D	1	0	1		2	E	0	0	0		2	E	0	0	0		2	E	0	0	0	0		2	D	1	0	1		2	D	1	0	1		2	D	1	0	1		2
3	A	1	0	1		3	A	1	0	1		3	A	0	0	0		3	A	0	0	0		3	A	0	0	0	0		3	A	1	0	1		3	A	1	0	1		3	A	1	0	1		3
4	I	1	0	1		4	I	1	0	1		4	I	0	0	0		4	I	1	0	1		4	I	1	0	1	0		4	I	1	0	1		4	I	1	0	1		4	I	1	0	1		4
5	K	1	0	1		5	K	1	0	1		5	K	0	0	0		5	K	1	0	1		5	K	1	0	1	0		5	K	1	0	1		5	K	1	0	1		5	K	1	0	1		5
6	K	1	0	1		6	K	1	0	1		6	N	0	0	0		6	K	1	0	1		6	K	1	0	1	0		6	K	1	0	1		6	K	1	0	1		6	K	1	0	1		6
7	K	1	0	1		7	K	1	0	1		7	K	0	0	0		7	K	1	0	1		7	K	1	0	1	0		7	K	1	0	1		7	K	1	0	1		7	K	1	0	1		7
8	M	1	0	1		8	M	1	0	1		8	M	0	0	0		8	M	1	0	1		8	M	1	0	1	0		8	M	1	0	1		8	M	1	0	1		8	M	1	0	1		8
9	Q	1	0	1		9	Q	1	1	2		9	Q	0	0	0		9	Q	1	0	1		9	Q	1	0	1	0		9	Q	1	0	1		9	Q	1	0	1		9	Q	1	0	1		9
10	A	0	0	0		10	A	1	0	1		10	A	0	0	0		10	A	1	0	1		10	A	1	0	1	0		10	A	1	0	1		10	A	1	0	1		10	A	1	0	1		10
11	M	0	0	0		11	M	1	0	1		11	M	0	0	0		11	M	1	0	1		11	M	1	0	1	0		11	M	1	0	1		11	M	1	0	1		11	M	1	0	1		11
12	K	0	0	0		12	K	1	0	1		12	K	0	0	0		12	K	1	0	1		12	K	1	0	1	0		12	K	1	0	1		12	K	1	0	1		12	K	1	0	1		12
13	I	0	0	0		13	L	1	0	1		13	L	0	0	0		13	L	1	0	1		13	L	1	0	1	0		13	L	1	0	1		13	L	1	0	1		13	L	1	0	1		13
14	E	0	0	0		14	E	1	0	1		14	E	0	0	0		14	E	1	0	1		14	E	1	0	1	0		14	E	1	0	1		14	E	1	0	1		14	E	1	0	1		14
15	K	0	0	0		15	K	1	0	1		15	K	0	0	0		15	K	1	0	1		15	K	1	0	1	0		15	K	1	0	1		15	K	1	0	1		15	K	1	0	1		15
16	D	0	0	0		16	D	1	0	1		16	D	0	0	0		16	D	1	0	1		16	D	1	0	1	0		16	D	1	0	1		16	D	1	0	1		16	D	1	0	1		16
17	N	0	0	0		17	N	1	0	1		17	N	0	0	0		17	N	1	0	1		17	N	1	0	1	0		17	N	1	0	1		17	N	1	0	1		17	N	1	0	1		17
18	A	0	0	0		18	A	1	0	1		18	A	0	0	0		18	A	1	0	1		18	A	1	0	1	0		18	A	1	0	1		18	A	1	0	1		18	A	1	0	1		18
19	L	0	0	0		19	A	0	0	0		19	I	0	0	0		19	I	0	0	0		19	I	0	0	0	0		19	M	1	0	1		19	M	1	0	1		19	M	1	0	1		19
20	D	0	0	0		20	D	0	0	0		20	D	0	0	0		20	D	0	0	0		20	D	0	0	0	0		20	D	1	0	1		20	D	1	0	1		20	D	1	0	1		20
21	R	0	0	0		21	K	0	0	0		21	R	0	0	0		21	R	0	0	0		21	R	0	0	0	0		21	R	1	0	1		21	R	1	0	1		21	R	1	0	1		21
22	A	0	0	0		22	A	0	0	0		22	A	0	0	0		22	A	0	0	0		22	A	0	0	0	0		22	A	1	0	1		22	A	1	0	1		22	A	1	0	1		22
23	D	0	0	0		23	D	0	0	0		23	E	0	0	0		23	E	0	0	0		23	E	0	0	0	0		23	D	1	0	1		23	D	1	0	1		23	D	1	0	1		23
24	A	0	0	0		24	T	0	0	0		24	I	0	0	0		24	I	0	0	0		24	I	0	0	0	0		24	T	1	0	1		24	T	1	0	1		24	T	1	0	1		24
25	A	0	0	0		25	C	0	0	0		25	A	0	0	0		25	A	0	0	0		25	A	0	0	0	0		25	L	1	0	1		25	L	1	0	1		25	L	1	0	1		25
26	E	0	0	0		26	E	0	0	0		26	E	0	0	0		26	E	0	0	0		26	E	0	0	0	0		26	E	1	0	1		26	E	1	0	1		26	E	1	0	1		26
27	E	0	0	0		27	N	1	0	1		27	Q	0	0	0		27	Q	0	0	0		27	Q	0	0	0	0		27	Q	1	0	1		27	Q	1	0	1		27	Q	1	0	1		27
28	K	0	0	0		28	Q	0	0	0		28	K	0	0	0		28	K	0	0	0		28	K	0	0	0	0		28	Q	1	0	1		28	Q	1	0	1		28	Q	1	0	1		28
29	V	0	0	0		29	A	0	0	0		29	A	0	0	0		29	A	0	0	0		29	S	0	0	0	0		29	N	1	0	1		29	N	1	0	1		29	N	1	0	1		29
30	R	0	0	0		30	K	0	0	0		30	R	0	0	0		30	R	0	0	0		30	R	0	0	0	0		30	K	1	0	1		30	K	1	0	1		30	K	1	0	1		30
31	Q	0	0	0		31	E	0	0	0		31	D	0	0	0		31	D	0	0	0		31	D	0	0	0	0		31	E	1	0	1		31	E	1	0	1		31	E	1	0	1		31
32	M	0	0	0		32	A	0	0	0		32	A	0	0	0		32	A	0	0	0		32	A	0	0	0	0		32	A	1	0	1		32	A	1	0	1		32	A	1	0	1		32
33	T	0	0	0		33	N	0	0	0		33	N	0	0	0		33	N	0	0	0		33	N	0	0	0	0		33	N	1	0	1		33	N	1	0	1		33	N	1	0	1		33
34	D	0	0	0		34	L	0	0	0		34	L	0	0	0		34	L	0	0	0		34	L	0	0	0	0		34	N	1	0	1		34	N	1	0	1		34	N	1	0	1		34
35	K	0	0	0		35	R	0	0	0		35	R	0	0	0		35	R	0	0	0		35	R	0	0	0	0		35	R	1	0	1		35	R	1	0	1		35	R	1	0	1		35
36	L	0	0	0		36	A	0	0	0		36	A	0	0	0		36	A	0	0	0		36	A	0	0	0	0		36	A	1	0	1		36	A	1	0	1		36	A	1	0	1		36
37	E	0	0	0		37	D	0	0	0		37	E	0	0	0		37	E	0	0	0		37	E	0	0	0	0		37	E	1	0	1		37	E	1	0	1		37	E	1	0	1		37
38	R	0	0	0		38	K	0	0	0		38	K	0	0	0		38	K	0	0	0		38	K	0	0	0	0		38	K	1	0	1		38	K	1	0	1		38	K	1	0	1		38
39	I	0	0	0		39	I	0	0	0		39	S	0	0	0		39	S	0	0	0		39	S	0	0	0	0		39	S	1	0	1		39	S	1	0	1		39	S	1	0	1		39
40	E	0	0	0		40	M	0	0	0		40	E	0	0	0		40	E	0	0	0		40	E	0	0	0	0		40	E	1	0	1		40	E	1	0	1		40	E	1	0	1		40
41	E	0	1	1		41	E	0	0	0		41	E	0	0	0		41	E	0	0	0		41	E	0	0	0	0		41	E	1	0	1		41	E	1	0	1		41	E	1	0	1		41
42	E	0	0	0		42	E	0	0	0		42	E	0	0	0		42	E	0	0	0		42	E	0	0	0	0		42	E	1	0	1		42	E	1	0	1		42	E	1	0	1		42
43	L	0	0	0		43	V	0	0	0		43	V	0	0	0		43	V	0	0	0		43	V	0	0	0	0		43	V	1	0	1		43	V	1	0	1		43	V	1	0	1		43
44	R	0	0	0		44	A	0	1	1		44	R	0	0	0		44	R	0	0	0		44	R	0	0	0	0		44	H	1	0	1		44	H	1	0	1		44	H	1	0	1		44
45	D	0	0	0		45	E	0	1	1		45	A	0	0	0		45	A	0	0	0		45	A	0	0	0	0		45	N	1	0	1		45	N	1	0	1		45	N	1	0	1		45
46	T	0	0	0		46	L	0	0	0		46	L	0	0	0		46	L	0	0	0		46	L	0	0	0	0		46	L	1	0	1		46	L	1	0	1		46	L	1	0	1		46
47	Q	0	0	0		47	T	0	0	0		47	Q	0	0	0		47	Q	0	0	0		47	Q	0	0	0	0		47	Q	1	0	1		47	Q	1	0	1		47	Q	1	0	1		47
48	K	0	0	0		48	K	0	1	1		48	K	0	0	0		48	K	0	0	0		48	K	0	0	0	0		48	K	1	1	2		48	K	1	1	2		48	K	1	1	2		48
49	K	0	0	0		49	R	0	0	0		49	K	0	0	0		49	K	0	0	0		49	K	0	0	0	0		49	R	1	0	1		49	R	1	0	1		49	R	1	0	1		49
50	M	0	0	0		50	L	0	0	0		50	I	0	0	0		50	I	0	0	0		50	I	0	0	0	0		50	M	1	0	1		50	M	1	0	1		50	M	1	0	1		50
51	M	0	0	0		51	T	0	0	0		51	Q	0	0	0		51	Q	0	0	0		51	Q	0	0	0	0		51	Q	1	1	2		51	Q	1	1	2		51	Q	1	1	2		51
52	Q	0	0	0		52	Q	0	0	0		52	Q	0	0	0		52	Q	0	0	0		52	Q	0	0	0	0		52	Q	1	1	2		52	Q	1	1	2		52	Q	1	1	2		52
53	T	0	0	0		53	V	0	0	0		53	I	0	0	0		53	I	0	0	0		53	I	0	0	0	0		53	L	1	0	1		53	L	1	0	1		53	L	1	0	1		53
54	E	0	0	0		54	T	0	0	0		54	E	0	0	0		54	E	0	0	0		54	E	0	0	0	0		54	E	1	0	1		54	E	1	0	1		54	E	1	0	1		54
55	N	0	0	0		55	E	0	0	0		55	N	0	0	0		55	N	0	0	0		55	N	0	0	0	0		55	N	1	1	2		55	N	1	1	2		55	N	1	1	2		55
56	D	0	0	0		56	D	0	0	0		56	E	0	0	0		56	E	0	0	0		56	E	0	0	0	0		56	D	1	0	1		56	D	1	0	1		56	D	1	0	1		56
57	L	0	0	0		57	H	0	0	0		57	L	0	0	0		57	L	0	0	0		57	L	0	0	0	0		57	L	1	0	1		57	L	1	0	1		57	L	1	0	1		57
58	D	0	0	0		58	E	0	0	0		58	D	0	0	0		58	D	0	0	0		58	D	0	0	0	0		58	D	1	0	1		58	D	1	0	1		58	D	1	0	1		58
59	K	0	0	0		59	K	0	0	0		59	Q	0	0	0		59	Q	0	0	0		59	Q	0	0	0	0		59	Q	1	0	1		59	Q	1	0	1		59	Q	1	0	1		59
60	A	0	0	0		60	F	0	0	0		60	V	0	0	0		60	V	0	0	0		60	V	0	0	0	0		60	V	1	0	1		60	V	1	0	1		60	V	1	0	1		60
61	Q	0	0	0		61	K	0	0	0		61	Q	0	0	0		61	Q	0	0	0		61	Q	0	0	0	0		61	Q	1	0	1		61	Q	1	0	1		61	Q	1	0	1		61
62	E	0	0	0		62	N	0	0	0		62	E	0	0	0		62	E	0	0	0		62	E	0	0	0	0		62	E	1	0	1		62	E	1	0	1		62	E	1	0	1		62
63	D	0	0	0		63	T	0	0	0		63	Q	0	0	0		63	Q	0	0	0		63	S	0	0	0	0		63	S	1	0	1		63	S	1	0	1		63	S	1	0	1		63
64	L	0	0	0		64	L	0	0	0		64	L	0	0	0		64	L	0	0	0		64	L	0	0	0	0		64	L	1	0	1		64	L	1	0	1		64	L	1	0	1		64
65	S	0	0	0		65	E	0	0	0		65	S	0	0	0		65	S	0	0	0		65	T	0	0	0	0		65	L	1	0	1		65	L	1	0	1		65	L	1	0	1		65
66	V	0	0	0		66	Q	0	0	0		66	A	0	0	0		66	A	0	0	0		66	Q	0	0	0	0		66	K	1	0	1		66	K	1	0	1		66	K	1	0	1		66
67	A	0	0	0		67	A	0	0	0		67	A	0	0	0		67	A	0	0	0		67	A	0	0	0	0		67	A	1	0	1		67	A	1	0	1		67	A	1	0	1		67
68	N	0	0	0		68	N	0	0	0		68	N	0	0	0		68	N	0	0	0		68	N	0	0	0	0		68	N	1	0	1		68	N	1	0	1		68	N	1	0	1		68
69	S	0	0	0		69	K	0	1	1		69	T	0	0	0		69	T	0	0	0		69	T	0	0	0	0		69	I	1	0	1		69	I	1	0	1		69	I	1	0	1		69
70	N	0	0	0		70	D	0	0	0		70	K	0	0	0		70	K	0	0	0		70	K	0	0	0	0		70	Q	1	0	1		70	Q	1	0	1		70	Q	1	0	1		70
71	L	0	0	0		71	L	0	0	0		71	L	0	0	0		71	L	0	0	0		71	L	0	0	0	0		71	L	1	0	1		71	L	1	0	1		71	L	1	0	1		71
72	E	0	0	0		72	E	0	0	0		72	E	0	0	0		72	E	0	0	0		72	E	0	0	0	0		72	V	1	0	1		72	V	1	0	1		72	V	1	0	1		72
73	E	0	0	0		73	E	0	1	1		73	E	0	0	0		73	E	0	0	0		73	E	0	0	0	0		73	E	1	0	1		73	E	1	0	1		73	E	1	0	1		73
74	K	0	0	0		74	K	0	0	0		74	K	0	0	0		74	K	0	0	0		74	K	0	0	0	0		74	K	1	0	1		74	K	1	0	1		74	K	1	0	1		74
75	E	0	0	0		75	E	0	0	0		75	E	0	0	0		75	E	0	0	0		75	E	0	0	0	0		75	D	1	0	1		75	D	1	0	1		75	D	1	0	1		75
76	K	0	0	0		76	K	0	1	1		76	K	0	0	0		76	K	0	0	0		76	K	0	0	0	0		76	K	1	0	1		76	K	1	0	1		76	K	1	0	1		76
77	K	0	0	0		77	L	0	0	0		77	A	0	0	0		77	A	0	0	0		77	S	0	0	0	0		77	A	1	0	1		77	A	1	0	1		77	A	1	0	1		77
78	V	0	0	0		78	L	0	0	0		78	L	0	0	0		78	L	0	0	0		78	L	0	0	0	0		78	L	1	0	1		78	L	1	0	1		78	L	1	0	1		78
79	Q	0	0	0		79	T	0	0	0		79	Q	0	0	0		79	Q	0	0	0		79	Q	0	0	0	0		79	S	1	0	1		79	S	1	0	1		79	S	1	0	1		79
80	E	0	0	0		80	S	0	0	0		80	T	0	0	0		80	T	0	0	0		80	T	0	0	0	0		80	N	1	0	1		80	N	1	0	1		80	N	1	0	1		80
81	A	0	0	0		81	T	0	0	0		81	A	0	0	0		81	A	0	0	0		81	A	0	0	0	0		81	A	1	0	1		81	A	1	0	1		81	A	1	0	1		81
82	E	0	0	0		82	E	0	0	0		82	E	0	0	0		82	E	0	0	0		82	E	0	0	0	0		82	E	1	0	1		82	E	1	0	1		82	E	1	0	1		82
83	A	0	0	0		83	A	0	0	0		83	G	0	0	0		83	G	0	0	0		83	G	0	0	0	0		83	G	1	0	1		83	G	1	0	1		83	G	1	0	1		83
84	E	0	0	0		84	N	0	0	0		84	D	0	0	0		84	D	0	0	0		84	D	0	0	0	0		84	E	1	0	1		84	E	1	0	1		84	E	1	0	1		84
85	V	1	0	1		85	V	0	0	0		85	V	1	0	1		85	V	1	0	1		85	V	1	0	1	0		85	V	1	0	1		85	V	1	0	1		85	V	1	0	1		85
86	A	1	0	1		86	A	0	0	0		86	A	1	0	1		86	A	1	0	1		86	A	1	0	1	0		86	A	1	0	1		86	A	1	0	1		86	A	1	0	1		86
87	A	1	0	1		87	A	0	0	0		87	A	1	0	1		87	A	1	0	1		87	A	1	0	1	0		87	A	1	1	2		87	A	1	1	2		87	A	1	1	2		87
88	L	1	0	1		88	L	0	0	0		88	L	1	0	1		88	L	1	0	1		88	L	1	0	1	0		88	L	1	0	1		88	L	1	0	1		88	L	1	0	1		88
89	N	1	0	1		89	T	0	0	0		89	N	1	0	1		89	N	1	0	1		89	N	1	0	1	0		89	N	1	0	1		89	N	1	0	1		89	N	1	0	1		89
90	R	1	1	2		90	R	0	0	0		90	R	1	1	2		90	R	1	1	2		90	R	1	1	2	1		90	R	1	1	2		90	R	1	1	2		90	R	1	1	2		90
91	R	1	0	1		91	K	0	0	0		91	R	1	1	2		91	R	1	1	2		91	R	1	1	2	1		91	R	1	1	2		91	R	1	1	2		91	R	1	1	2		91
92	M	0	1	1		92	V	0	0	0		92	I	1	1	2		92	I	0	1	1		92	I	0	1	1	0		92	I	1	1	2		92	I	1	1	2		92	I	1	1	2		92
93	T	0	1	1		93	Q	0	1	1		93	Q	0	1	1		93	Q	0	1	1		93	Q	0	1	1	0		93	Q	1	1	2		93	Q	1	1	2		93	Q	1	1	2		93
94	L	0	1	1		94	Q	0	1	1		94	L	0	1	1		94	L	0	1	1		94	L	0	1	1	0		94	L	1	1	2		94	L	1	1	2		94	L	1	1	2		94
95	L	0	1	1		95	V	0	0	0		95	I	0	1	1		95	I	0	1	1		95	I	0	1	1	0		95	L	1	1	2		95	L	1	1	2		95	L	1	1	2		95
96	E	0	1	1		96	E	0	0	0		96	E	0	0	0		96	E	0	0	0		96	E	0	1	1	0		96	E	1	1	2		96	E	1	1	2		96	E	1	1	2		96
97	E	0	1	1		97	E	0	1	1		97	E	0	1	1		97	E	0	1	1		97	E	0	1	1	0		97	E	1	1	2		97	E	1	1	2		97	E	1	1	2		97
98	E	0	1	1		98	D	0	0	0		98	D	0	0	0		98	D	0	0	0		98	D	0	1	1	0		98	D	1	1	2		98	D	1	1	2		98	D	1	1	2		98
99	L	0	1	1		99	L	0	0	0		99	L	0	0	0		99	L	0	0	0		99	L	0	0	0	0		99	L	1	0	1		99	L	1	0	1		99	L	1	0	1		99
100	E	0	1	1		100	E	0	0	0		100	E	0	1	1		100	E	0	1	1		100	E	0	1	1	0		100	E	1	1	2		100	E	1	1	2		100	E	1	1	2		100
101	R	0	1	1		101	K	0	0	0		101	R	0	1	1		101	R	0	1	1		101	R	0	1	1	0		101	R	1	1	2		101	R	1	1	2		101	R	1	1	2		101
102	A	0	1	1		102	S	0	0	0		102	S	0	0	0		102	S	0	0	0		102	S	0	0	0	0		102	S	1	0	1		102	S	1	0	1		102	S	1	0	1		102
103	E	0	0	0		103	E	0	0	0		103	E	0	0	0		103	E	0	0	0		103	E	0	0	0	0		103	E	1	0	1		103	E	1	0	1		103	E	1	0	1		103
104	E	0	1	1		104	E	0	0	0		104	E	0	0	0		104	E	0	0	0		104	E	0	0	0	0		104	E	1	1	2		104	E	1	1	2		104	E	1	1	2		104
105	R	0	0	0		105	R	0	0	0		105	R	0	0	0		105	R	0	0	0		105	R	0	0	0	0		105	R	1	0	1		105	R	1	0	1		105	R	1	0	1		105
106	L	0	0	0		106	S	0	0	0		106	L	0	0	0		106	L	0	0	0		106	L	0	0	0	0		106	L	1	0	1		106	L	1	0	1		106	L	1	0	1		106
107	K	0	0	0		107	G	0	0	0		107	K	0	0	0		107	K	0	0	0		107	K	0	0	0	0		107	N	1	0	1		107	N	1	0	1		107	N	1	0	1		107
108	L	0	0	0		108	A	0	0	0		108	I	1	0	1		108	I	1	0	1		108	V	0	0	0	0		108	T	1	0	1		108	T	1	0	1		108	T	1	0	1		108
109	A	0	0	0		109	A	0	0	0		109	A	1	0	1		109	A	1	0	1		109	A	0	0	0	0		109	A	1	0	1		109	A	1	0	1		109	A	1	0	1		109
110	T	0	0	0		110	L	0	0	0		110	T	0	0	0		110	T	0	0	0		110	T	0	0	0	0		110	T	1	0	1		110	T	1	0	1		110	T	1	0	1		110
111	E	0	0	0		111	S	0	0	0		111	A	0	0	0		111	A	0	0	0		111	A	0	0	0	0		111	T	1	0	1		111	T	1	0	1		111	T	1	0	1		111
112	K	0	0	0		112	K	0	0	0		112	K	0	0	0		112	K	0	0	0		112	K	0	0	0	0		112	K	1	0	1		112	K	1	0	1		112	K	1	0	1		112
113	L	0	0	0		113	L	0	0	0		113	L	0	0	0		113	L	0	0	0		113	L	0	0	0	0		113	L	1	0	1		113	L	1	0	1		113	L	1	0	1		113
114	E	0	0	0		114	L	0	0	0		114	E	0	0	0		114	E	0	0	0		114	E	0	0	0	0		114	A	1	0	1		114	A	1	0	1		114	A	1	0	1		114
115	E	0	0	0		115	E	0	0	0		115	E	0	0	0		115	E	0	0	0		115	E	0	0	0	0		115	E	1	0	1		115	E	1	0	1		115	E	1	0	1		115
116	A	0	0	0		116	A	0	0	0		116	A	0	0	0		116	A	0	0	0		116	A	0	0	0	0		116	A	1	0	1		116	A	1	0	1		116	A	1	0	1		116
117	T	0	0	0		117	T	0	0	0		117	S	0	0	0		117	S	0	0	0		117	S	0	0	0	0		117	S	1	0	1		117	S	1	0	1		117	S	1	0	1		117
118	H	0	0	0		118	Q	0	1	1		118	Q	0	0	0		118	Q	0	0	0		118	H	0	0	0	0		118	Q	1	0	1		118	Q	1	0	1		118	Q	1	0	1		118
119	T	0	0	0		119	S	0	0	0		119	S	0	0	0		119	S	0	0	0		119	S	0	0	0	0		119	A	1	0	1		119	A	1	0	1		119	A	1	0	1		119
120	A	0	0	0		120	A	0	0	0		120	A	0	0	0		120	A	0	0	0		120	A	0	0	0	0		120	A	1	0	1		120	A	1	0	1		120	A	1	0	1		120
121	D	0	0	0		121	D	0	0	0		121	D	0	0	0		121	D	0	0	0		121	D	0	0	0	0		121	D	1	0	1		121	D	1	0	1		121	D	1	0	1		121
122	E	0	0	0		122	E	0	1	1		122	E	0	0	0		122	E	0	0	0		122	E	0	0	0	0		122	E	1	0	1		122	E	1	0	1		122	E	1	0	1		122
123	S	0	0	0		123	N	0	0	0		123	S	0	0	0		123	S	0	0	0		123	S	0	0	0	0		123	S	1	0	1		123	S	1	0	1		123	S	1	0	1		123
124	E	0	0	0		124	N	0	0	0		124	E	0	0	0		124	E	0	0	0		124	E	0	0	0	0		124	E	1	0	1		124	E	1	0	1		124	E	1	0	1		124
125	R	0	0	0		125	R	0	1	1		125	R	0	0	0		125	R	0	0	0		125	R	0	0	0	0		125	R	1	0	1		125	R	1	0	1		125	R	1	0	1		125
126	V	0	0	0		126	M	0	0	0		126	M	0	0	0		126	M	0	0	0		126	M	0	0	0	0		126	M	1	0	1		126	M	1	0	1		126	M	1	0	1		126
127	R	0	0	0		127	C	0	0	0		127	R	0	0	0		127	R	0	0	0		127	R	0	0	0	0		127	R	1	0	1		127	R	1	0	1		127	R	1	0	1		127
128	K	0	0	0		128	K	1	1	2		128	K	0	0	0		128	K	0	0	0		128	K	0	0	0	0		128	K	1	0	1		128	K	1	0	1		128	K	1	0	1		128
129	V	0	0	0		129	V	1	1	2		129	M	0	0	0		129	M	0	0	0		129	M	0	1	1	0		129	V	1	0	1		129	V	1	0	1		129	V	1	0	1		129
130	M	0	0	0		130	L	1	0	1		130	L	0	0	0		130	L	0	0	0		130	L	0	0	0	0		130	L	1	0	1		130	L	1	0	1		130	L	1	0	1		130
131	E	0	0	0		131	E	1	0	1		131	E	0	0	0		131	E	0	0	0		131	E	0	0	0	0		131	E	1	0	1		131	E	1	0	1		131	E	1	0	1		131
132	N	0	0	0		132	N	1	1	2		132	H	0	1	1		132	H	0	1	1		132	H	0	1	1	0		132	N	1	1	2		132	N	1	1	2		132	N	1	1	2		132
133	R	0	0	0		133	R	1	1	2		133	R	0	0	0		133	R	0	0	0		133	R	0	0	0	0		133	R	1	0	1		133	R	1	0	1		133	R	1	0	1		133
134	S	0	0	0		134	S	0	1	1		134	S	0	0	0		134	S	0	0	0		134	S	0	0	0	0		134	S	1	0	1		134	S	1	0	1		134	S	1	0	1		134
135	F	0	0	0		135	Q	0	1	1		135	I	0	0	0		135	I	0	0	0		135	I	0	1	1	0		135	L	1	1	2		135	L	1	1	2		135	L	1	1	2		135
136	Q	0	1	1		136	Q	0	1	1		136	T	0	1	1		136	T	0	1	1		136	T	0	1	1	0		136	S	1	1	2		136	S	1	1	2		136	S	1	1	2		136
137	D	0	0	0		137	D	1	1	2		137	D	1	0	1		137	D	1	0	1		137	D	1	0	1	0		137	D	1	0	1		137	D	1	0	1		137	D	1	0	1		137
138	E	0	0	0		138	E	1	1	2		138	E	1	0	1		138	E	1	0	1		138	E	1	0	1	0		138	E	1	0	1		138	E	1	0	1		138	E	1	0	1		138
139	E	0	1	1		139	E	1	1	2		139	E	1	1	2		139	E	1	1	2		139	E	1	1	2	1		139	E	1	1	2		139	E	1	1	2		139	E	1	1	2		139
140	R	0	0	0		140	R	1	1	2		140	R	1	0	1		140	R	1	0	1		140	R	1	0	1	0		140	R	1	0	1		140	R	1	0	1		140	R	1	0	1		140
141	A	0	0	0		141	M	1	1	2		141	M	1	0	1		141	M	1	0	1		141	M	1	0	1	0		141	M	1	0	1		141	M	1	0	1		141	M	1	0	1		141
142	N	0	0	0		142	D	0	1	1		142	E	0	1	1		142	D	0	1	1		142	D	0	1	1	0		142	D	1	1	2		142	D	1	1	2		142	D	1	1	2		142
143	T	0	1	1		143	Q	0	1	1		143	G	0	1	1		143	G	0	1	1		143	G	0	1	1	0		143	A	1	1	2		143	A	1	1	2		143	A	1	1	2		143
144	V	0	0	0		144	L	0	0	0		144	L	0	0	0		144	L	0	0	0		144	L	0	0	0	0		144	L	1	0	1		144	L	1	0	1		144	L	1	0	1		144
145	E	0	0	0		145	S	0	0	0		145	E	1	0	1		145	E	1	0	1		145	E	0	0	0	0		145	E	1	0	1		145	E	1	0	1		145	E	1	0	1		145
146	S	0	1	1		146	N	0	1	1		146	N	1	1	2		146	N	1	1	2		146	S	0	1	1	0		146	N	1	1	2		146	N	1	1	2		146	N	1	1	2		146
147	Q	0	0	0		147	Q	0	0	0		147	Q	1	0	1		147	Q	1	0	1		147	Q	0	0	0	0		147	Q	1	0	1		147	Q	1	0	1		147	Q	1	0	1		147
148	L	0	0	0		148	L	0	0	0		148	L	1	0	1		148	L	1	0	1		148	L	0	0	0	0		148	L	1	0	1		148	L	1	0	1		148	L	1	0	1		148
149	K	0	0	0		149	K	0	1	1		149	K	1	0	1		149	K	1	0	1		149	K	0	0	0	0		149	K	1	1	2		149	K	1	1	2		149	K	1	1	2		149
150	E	0	0	0		150	E	0	1	1		150	E	1	0	1		150	E	1	0	1		150	E	0	0	0	0		150	E	1	0	1		150	E	1	0	1		150	E	1	0	1		150
151	A	0	0	0		151	A	0	0	0		151	A	1	0	1		151	A	1	0	1		151	A	0	0	0	0		151	A	1	0	1		151	A	1	0	1		151	A	1	0	1		151
152	Q	0	0	0		152	R	0	0	0		152	R	0	0	0		152	R	0	0	0		152	R	0	0	0	0		152	R	1	0	1		152	R	1	0	1		152	R	1	0	1		152
153	M	0	1	1		153	M	0	1	1		153	M	0	0	0		153	M	0	0	0		153	M	0	0	0	0		153	F	1	1	2		153	F	1	1	2		153	F	1	1	2		153
154	L	0	0	0		154	L	0	0	0		154	M	0	0	0		154	M	0	0	0		154	M	0	0	0	0		154	L	1	0	1		154	L	1	0	1		154	L	1	0	1		154
155	A	1	0	1		155	A	0	0	0		155	A	0	0	0		155	A	0	0	0		155	A	0	0	0	0		155	A	1	0	1		155	A	1	0	1		155	A	1	0	1		155
156	E	1	0	1		156	E	0	1	1		156	E	0	0	0		156	E	0	0	0		156	E	0	0	0	0		156	E	1	0	1		156	E	1	0	1		156	E	1	0	1		156
157	E	1	0	1		157	D	0	1	1		157	D	0	0	0		157	D	0	0	0		157	D	0	0	0	0		157	E	1	0	1		157	E	1	0	1		157	E	1	0	1		157
158	A	1	0	1		158	A	0	0	0		158	A	0	0	0		158	A	0	0	0		158	A	0	0	0	0		158	A	1	0	1		158	A	1	0	1		158	A	1	0	1		158
159	D	1	0	1		159	D	0	0	0		159	D	0	0	0		159	D	0	0	0		159	D	0	0	0	0		159	D	1	0	1		159	D	1	0	1		159	D	1	0	1		159
160	R	1	0	1		160	G	0	1	1		160	R	1	0	1		160	R	1	0	1		160	R	1	0	1	0		160	R	1	1	2		160	R	1	1	2		160	R	1	1	2		160
161	K	1	0	1		161	K	0	0	0		161	K	1	0	1		161	K	1	0	1		161	K	1	0	1	0		161	K	1	0	1		161	K	1	0	1		161	K	1	0	1		161
162	Y	1	0	1		162	S	0	0	0		162	Y	1	0	1		162	Y	1	0	1		162	Y	1	0	1	0		162	Y	1	0	1		162	Y	1	0	1		162	Y	1	0	1		162
163	D	1	0	1		163	D	0	1	1		163	D	1	0	1		163	D	1	0	1		163	D	1	1	2	1		163	D	1	1	2		163	D	1	1	2		163	D	1	1	2		163
164	E	1	1	2		164	E	0	1	1		164	E	1	1	2		164	E	1	1	2		164	E	1	1	2	1		164	E	1	1	2		164	E	1	1	2		164	E	1	1	2		164
165	V	1	0	1		165	V	0	0	0		165	V	1	0	1		165	V	1	0	1		165	V	1	0	1	0		165	V	1	0	1		165	V	1	0	1		165	V	1	0	1		165
166	A	1	0	1		166	S	0	0	0		166	A	1	0	1		166	A	1	0	1		166	A	1	0	1	0		166	A	1	0	1		166	A	1	0	1		166	A	1	0	1		166
167	R	1	1	2		167	R	0	1	1		167	R	1	1	2		167	R	1	1	2		167	R	1	1	2	1		167	R	1	1	2		167	R	1	1	2		167	R	1	1	2		167
168	K	1	0	1		168	K	0	0	0		168	K	1	0	1		168	K	1	0	1		168	K	1	0	1	0		168	K	1	0	1		168	K	1	0	1		168	K	1	0	1		168
169	L	1	0	1		169	L	0	0	0		169	L	1	0	1		169	L	1	0	1		169	L	1	0	1	0		169	L	1	0	1		169	L	1	0	1		169	L	1	0	1		169
170	A	1	0	1		170	A	0	1	1		170	A	1	1	2		170	A	1	1	2		170	A	1	1	2	1		170	A	1	1	2		170	A	1	1	2		170	A	1	1	2		170
171	M	1	0	1		171	F	0	1	1		171	M	1	1	2		171	M	1	1	2		171	M	1	1	2	1		171	M	1	1	2		171	M	1	1	2		171	M	1	1	2		171
172	V	1	0	1		172	V	0	0	0		172	V	1	0	1		172	V	1	0	1		172	V	1	0	1	0		172	V	1	0	1		172	V	1	0	1		172	V	1	0	1		172
173	E	1	0	1		173	E	0	0	0		173	E	1	0	1		173	E	1	0	1		173	E	1	0	1	0		173	E	1	0	1		173	E	1	0	1		173	E	1	0	1		173
174	A	1	1	2		174	D	0	1	1		174	A	1	1	2		174	A	1	1	2		174	A	1	1	2	1		174	A	1	1	2		174	A	1	1	2		174	A	1	1	2		174
175	D	1	0	1		175	E	0	0	0		175	D	1	0	1		175	D	1	0	1		175	D	1	0	1	0		175	D	1	0	1		175	D	1	0	1		175	D	1	0	1		175
176	L	1	0	1		176	L	0	0	0		176	L	1	0	1		176	L	1	0	1		176	L	1	0	1	0		176	L	1	0	1		176	L	1	0	1		176	L	1	0	1		176
177	E	1	0	1		177	E	0	1	1		177	E	1	0	1		177	E	1	0	1		177	E	1	0	1	0		177	E	1	0	1		177	E	1	0	1		177	E	1	0	1		177
178	R	1	0	1		178	V	0	1	1		178	R	1	0	1		178	R	1	0	1		178	R	1	0	1	0		178	R	1	0	1		178	R	1	0	1		178	R	1	0	1		178
179	A	1	0	1		179	A	0	0	0		179	A	1	0	1		179	A	1	0	1		179	A	1	0	1	0		179	A	1	0	1		179	A	1	0	1		179	A	1	0	1		179
180	E	1	0	1		180	E	0	0	0		180	E	1	0	1		180	E	1	0	1		180	E	1	0	1	0		180	E	1	0	1		180	E	1	0	1		180	E	1	0	1		180
181	E	1	0	1		181	D	0	0	0		181	E	1	1	2		181	E	1	0	1		181	E	1	1	2	1		181	E	1	1	2		181	E	1	1	2		181	E	1	1	2		181
182	R	1	0	1		182	R	0	0	0		182	R	1	0	1		182	R	1	0	1		182	R	1	0	1	0		182	R	1	0	1		182	R	1	0	1		182	R	1	0	1		182
183	A	1	0	1		183	V	0	0	0		183	A	1	0	1		183	A	1	0	1		183	A	1	0	1	0		183	A	1	0	1		183	A	1	0	1		183	A	1	0	1		183
184	E	0	0	0		184	K	0	0	0		184	E	1	0	1		184	E	1	0	1		184	E	1	0	1	0		184	E	1	0	1		184	E	1	0	1		184	E	1	0	1		184
185	A	0	0	0		185	S	0	0	0		185	T	1	0	1		185	T	1	0	1		185	T	1	0	1	0		185	T	1	0	1		185	T	1	0	1		185	T	1	0	1		185
186	G	0	0	0		186	G	0	0	0		186	G	1	0	1		186	G	1	0	1		186	G	1	0	1	0		186	G	1	0	1		186	G	1	0	1		186	G	1	0	1		186
187	E	0	0	0		187	E	0	0	0		187	E	1	0	1		187	E	1	0	1		187	E	0	0	0	0		187	E	1	0	1		187	E	1	0	1		187	E	1	0	1		187
188	N	0	0	0		188	A	0	0	0		188	S	1	0	1		188	S	1	0	1		188	T	0	0	0	0		188	S	1	0	1		188	S	1	0	1		188	S	1	0	1		188
189	K	0	0	0		189	K	0	0	0		189	K	1	0	1		189	K	1	0	1		189	K	0	0	0	0		189	K	1	0	1		189	K	1	0	1		189	K	1	0	1		189
190	I	1	0	1		190	I	0	0	0		190	I	1	0	1		190	I	1	0	1		190	I	1	0	1	0		190	I	1	0	1		190	I	1	0	1		190	I	1	0	1		190
191	V	1	0	1		191	M	0	0	0		191	V	1	0	1		191	V	1	0	1		191	V	1	0	1	0		191	V	1	0	1		191	V	1	0	1		191	V	1	0	1		191
192	E	1	1	2		192	E	0	0	0		192	E	1	1	2		192	E	1	1	2		192	E	1	1	2	1		192	E	1	1	2		192	E	1	1	2		192	E	1	1	2		192
193	L	1	0	1		193	L	0	0	0		193	L	1	0	1		193	L	1	0	1		193	L	1	0	1	0		193	L	1	0	1		193	L	1	0	1		193	L	1	0	1		193
194	E	1	1	2		194	E	0	0	0		194	E	1	1	2		194	E	1	1	2		194	E	1	1	2	1		194	E	1	1	2		194	E	1	1	2		194	E	1	1	2		194
195	E	1	1	2		195	E	0	1	1		195	E	1	1	2		195	E	1	1	2		195	E	1	1	2	1		195	E	1	1	2		195	E	1	1	2		195	E	1	1	2		195
196	E	1	1	2		196	E	0	1	1		196	E	1	1	2		196	E	1	1	2		196	E	1	1	2	1		196	E	1	1	2		196	E	1	1	2		196	E	1	1	2		196
197	L	1	1	2		197	L	0	1	1		197	L	1	1	2		197	L	1	1	2		197	L	1	1	2	1		197	L	1	1	2		197	L	1	1	2		197	L	1	1	2		197
198	R	1	1	2		198	K	0	1	1		198	R	1	1	2		198	R	1	1	2		198	R	1	1	2	1		198	R	1	1	2		198	R	1	1	2		198	R	1	1	2		198
199	V	1	1	2		199	V	0	1	1		199	V	1	1	2		199	V	1	1	2		199	V	1	1	2	1		199	V	1	1	2		199	V	1	1	2		199	V	1	1	2		199
200	V	1	0	1		200	V	0	0	0		200	V	1	0	1		200	V	1	0	1		200	V	1	1	2	1		200	V	1	1	2		200	V	1	1	2		200	V	1	1	2		200
201	G	1	0	1		201	G	0	1	1		201	G	1	1	2		201	G	1	1	2		201	G	1	1	2	1		201	G	1	1	2		201	G	1	1	2		201	G	1	1	2		201
202	N	1	1	2		202	N	0	1	1		202	N	1	1	2		202	N	1	1	2		202	N	1	1	2	1		202	N	1	1	2		202	N	1	1	2		202	N	1	1	2		202
203	N	1	0	1		203	S	0	0	0		203	N	1	0	1		203	N	1	0	1		203	N	1	0	1	0		203	N	1	0	1		203	N	1	0	1		203	N	1	0	1		203
204	L	1	0	1		204	L	0	0	0		204	L	1	0	1		204	L	1	0	1		204	L	1	0	1	0		204	L	1	0	1		204	L	1	0	1		204	L	1	0	1		204
205	K	1	1	2		205	K	0	1	1		205	K	1	1	2		205	K	1	1	2		205	K	1	1	2	1		205	K	1	1	2		205	K	1	1	2		205	K	1	1	2		205
206	S	1	0	1		206	S	0	1	1		206	S	1	0	1		206	S	1	0	1		206	S	1	1	2	1		206	S	1	0	1		206	S	1	0	1		206	S	1	0	1		206
207	L	1	0	1		207	L	0	0	0		207	L	1	0	1		207	L	1	0	1		207	L	1	0	1	0		207	L	1	0	1		207	L	1	0	1		207	L	1	0	1		207
208	E	1	0	1		208	E	0	0	0		208	E	1	0	1		208	E	1	0	1		208	E	1	0	1	0		208	E	1	0	1		208	E	1	0	1		208	E	1	0	1		208
209	V	1	1	2		209	V	0	1	1		209	V	1	1	2		209	V	1	1	2		209	V	1	1	2	1		209	V	1	1	2		209	V	1	1	2		209	V	1	1	2		209
210	S	1	0	1		210	S	0	0	0		210	S	1	0	1		210	S	1	0	1		210	S	1	0	1	0		210	S	1	0	1		210	S	1	0	1		210	S	1	0	1		210
211	E	1	0	1		211	E	0	0	0		211	E	1	0	1		211	E	1	0	1		211	E	1	0	1	0		211	E	1	0	1		211	E	1	0	1		211	E	1	0	1		211
212	E	1	1	2		212	D	0	0	0		212	E	1	1	2		212	E	1	1	2		212	E	1	1	2	1		212	E	1	1	2		212	E	1	1	2		212	E	1	1	2		212
213	K	1	1	2		213	K	0	1	1		213	K	1	1	2		213	K	1	1	2		213	K	1	1	2	1		213	K	1	1	2		213	K	1	1	2		213	K	1	1	2		213
214	A	0	0	0		214	A	0	0	0		214	A	0	0	0		214	A	0	0	0		214	A	0	0	0	0		214	A	1	0	1		214	A	1	0	1		214	A	1	0	1		214
215	L	0	1	1		215	N	0	0	0		215	Q	0	1	1		215	Q	0	1	1		215	Q	0	1	1	0		215	N	1	1	2		215	N	1	1	2		215	N	1	1	2		215
216	Q	0	1	1		216	Q	0	1	1		216	Q	0	1	1		216	Q	0	1	1		216	Q	0	1	1	0		216	Q	1	1	2		216	Q	1	1	2		216	Q	1	1	2		216
217	R	0	0	0		217	R	0	1	1		217	R	0	0	0		217	R	0	0	0		217	R	0	0	0	0		217	R	1	0	1		217	R	1	0	1		217	R	1	0	1		217
218	E	0	0	0		218	V	0	0	0		218	E	0	0	0		218	E	0	0	0		218	E	0	0	0	0		218	E	1	0	1		218	E	1	0	1		218	E	1	0	1		218
219	D	0	1	1		219	E	0	1	1		219	E	0	1	1		219	E	0	1	1		219	E	0	1	1	0		219	E	1	1	2		219	E	1	1	2		219	E	1	1	2		219
220	S	0	1	1		220	E	0	1	1		220	A	0	1	1		220	A	0	1	1		220	A	0	1	1	0		220	A	1	1	2		220	A	1	1	2		220	A	1	1	2		220
221	Y	0	1	1		221	F	0	1	1		221	H	0	1	1		221	Y	0	1	1		221	Y	0	1	1	0		221	Y	1	0	1		221	Y	1	0	1		221	Y	1	0	1		221
222	E	0	1	1		222	K	0	1	1		222	E	0	1	1		222	E	0	1	1		222	E	0	1	1	0		222	K	1	0	1		222	K	1	0	1		222	K	1	0	1		222
223	E	0	1	1		223	R	0	1	1		223	Q	0	1	1		223	Q	0	1	1		223	Q	0	1	1	0		223	E	1	1	2		223	E	1	1	2		223	E	1	1	2		223
224	Q	0	1	1		224	Q	0	1	1		224	Q	0	1	1		224	Q	0	1	1		224	Q	0	1	1	0		224	Q	1	0	1		224	Q	1	0	1		224	Q	1	0	1		224
225	I	0	1	1		225	L	0	1	1		225	I	0	1	1		225	I	0	1	1		225	I	0	1	1	0		225	I	1	0	1		225	I	1	0	1		225	I	1	0	1		225
226	R	0	1	1		226	K	0	1	1		226	R	0	1	1		226	R	0	1	1		226	R	0	1	1	0		226	K	1	0	1		226	K	1	0	1		226	K	1	0	1		226
227	T	0	1	1		227	S	0	1	1		227	I	0	1	1		227	I	0	1	1		227	M	0	1	1	0		227	T	1	0	1		227	T	1	0	1		227	T	1	0	1		227
228	V	0	0	0		228	L	0	0	0		228	M	0	0	0		228	M	0	0	0		228	M	0	0	0	0		228	L	1	0	1		228	L	1	0	1		228	L	1	0	1		228
229	S	0	0	0		229	T	0	0	0		229	T	0	0	0		229	T	0	0	0		229	T	0	0	0	0		229	T	1	0	1		229	T	1	0	1		229	T	1	0	1		229
230	A	0	1	1		230	I	0	1	1		230	T	0	1	1		230	A	0	1	1		230	G	0	1	1	0		230	N	1	0	1		230	N	1	0	1		230	N	1	0	1		230
231	R	0	0	0		231	K	0	0	0		231	K	0	0	0		231	K	0	0	0		231	K	0	0	0	0		231	K	1	0	1		231	K	1	0	1		231	K	1	0	1		231
232	L	0	0	0		232	L	0	0	0		232	L	0	0	0		232	L	0	0	0		232	L	0	0	0	0		232	L	1	0	1		232	L	1	0	1		232	L	1	0	1		232
233	K	0	0	0		233	K	0	1	1		233	K	0	0	0		233	K	0	0	0		233	K	0	0	0	0		233	K	1	0	1		233	K	1	0	1		233	K	1	0	1		233
234	E	0	1	1		234	E	0	1	1		234	E	0	0	0		234	E	0	0	0		234	E	0	0	0	0		234	A	1	0	1		234	A	1	0	1		234	A	1	0	1		234
235	A	0	0	0		235	A	0	0	0		235	A	1	0	1		235	A	0	0	0		235	A	0	0	0	0		235	A	1	0	1		235	A	1	0	1		235	A	1	0	1		235
236	E	0	0	0		236	E	0	0	0		236	E	1	0	1		236	E	1	0	1		236	E	0	0	0	0		236	E	1	0	1		236	E	1	0	1		236	E	1	0	1		236
237	T	0	1	1		237	T	0	1	1		237	A	1	0	1		237	A	1	0	1		237	A	0	1	1	0		237	A	1	0	1		237	A	1	0	1		237	A	1	0	1		237
238	R	1	0	1		238	R	0	0	0		238	R	1	0	1		238	R	1	0	1		238	R	0	0	0	0		238	R	1	0	1		238	R	1	0	1		238	R	1	0	1		238
239	A	1	0	1		239	A	0	0	0		239	A	1	0	1		239	A	1	0	1		239	A	0	0	0	0		239	A	1	0	1		239	A	1	0	1		239	A	1	0	1		239
240	E	1	0	1		240	E	0	0	0		240	E	1	0	1		240	E	1	0	1		240	E	0	0	0	0		240	E	1	0	1		240	E	1	0	1		240	E	1	0	1		240
241	F	1	0	1		241	N	0	0	0		241	F	1	0	1		241	F	1	0	1		241	F	0	0	0	0		241	F	1	0	1		241	F	1	0	1		241	F	1	0	1		241
242	A	1	0	1		242	A	0	0	0		242	A	1	0	1		242	A	1	0	1		242	A	0	0	0	0		242	A	1	0	1		242	A	1	0	1		242	A	1	0	1		242
243	E	1	0	1		243	E	0	0	0		243	E	1	0	1		243	E	1	0	1		243	E	0	0	0	0		243	E	1	0	1		243	E	1	0	1		243	E	1	0	1		243
244	R	1	0	1		244	K	0	1	1		244	R	1	0	1		244	R	1	0	1		244	R	0	0	0	0		244	R	1	0	1		244	R	1	0	1		244	R	1	0	1		244
245	S	1	0	1		245	N	0	0	0		245	S	1	0	1		245	S	1	0	1		245	S	0	0	0	0		245	S	1	0	1		245	S	1	0	1		245	S	1	0	1		245
246	V	1	0	1		246	V	0	0	0		246	V	1	0	1		246	V	1	0	1		246	V	0	0	0	0		246	V	1	0	1		246	V	1	0	1		246	V	1	0	1		246
247	Q	1	0	1		247	K	0	0	0		247	Q	1	0	1		247	Q	1	0	1		247	R	0	0	0	0		247	Q	1	0	1		247	Q	1	0	1		247	Q	1	0	1		247
248	K	1	0	1		248	K	0	1	1		248	K	1	0	1		248	K	1	0	1		248	K	0	0	0	0		248	K	1	0	1		248	K	1	0	1		248	K	1	0	1		248
249	L	1	0	1		249	L	0	0	0		249	L	1	0	1		249	L	1	0	1		249	L	0	0	0	0		249	L	1	0	1		249	L	1	0	1		249	L	1	0	1		249
250	Q	1	0	1		250	Q	0	0	0		250	Q	1	0	1		250	Q	1	0	1		250	Q	1	0	1	0		250	Q	1	0	1		250	Q	1	0	1		250	Q	1	0	1		250
251	K	1	1	2		251	K	1	1	2		251	K	1	1	2		251	K	1	1	2		251	K	1	1	2	1		251	K	1	1	2		251	K	1	1	2		251	K	1	1	2		251
252	E	1	0	1		252	E	1	0	1		252	E	1	0	1		252	E	1	0	1		252	E	1	0	1	0		252	E	1	0	1		252	E	1	0	1		252	E	1	0	1		252
253	V	1	0	1		253	V	1	0	1		253	V	0	0	0		253	V	1	0	1		253	V	1	0	1	0		253	V	1	0	1		253	V	1	0	1		253	V	1	0	1		253
254	D	1	1	2		254	D	1	1	2		254	G	0	1	1		254	D	1	1	2		254	D	1	1	2	1		254	D	1	1	2		254	D	1	1	2		254	D	1	1	2		254
255	R	1	1	2		255	R	1	1	2		255	R	0	0	0		255	R	1	0	1		255	R	1	0	1	0		255	R	1	0	1		255	R	1	0	1		255	R	1	0	1		255
256	L	1	0	1		256	L	1	0	1		256	L	0	0	0		256	L	1	0	1		256	L	1	0	1	0		256	L	1	0	1		256	L	1	0	1		256	L	1	0	1		256
257	E	1	0	1		257	E	1	0	1		257	E	0	0	0		257	E	1	0	1		257	E	1	0	1	0		257	E	1	0	1		257	E	1	0	1		257	E	1	0	1		257
258	D	1	1	2		258	D	1	1	2		258	D	0	0	0		258	D	1	0	1		258	D	1	1	2	1		258	D	1	1	2		258	D	1	1	2		258	D	1	1	2		258
259	E	1	0	1		259	E	1	0	1		259	E	0	0	0		259	E	1	0	1		259	E	1	0	1	0		259	E	1	0	1		259	E	1	0	1		259	E	1	0	1		259
260	L	1	0	1		260	L	0	0	0		260	L	0	0	0		260	L	1	0	1		260	L	1	0	1	0		260	L	1	0	1		260	L	1	0	1		260	L	1	0	1		260
261	V	1	0	1		261	G	0	1	1		261	V	0	0	0		261	V	1	0	1		261	V	1	0	1	0		261	V	1	0	1		261	V	1	0	1		261	V	1	0	1		261
262	H	0	0	0		262	V	0	1	1		262	H	0	0	0		262	H	0	0	0		262	H	0	0	0	0		262	N	1	0	1		262	N	1	0	1		262	N	1	0	1		262
263	E	0	0	0		263	N	0	0	0		263	E	0	0	0		263	E	0	0	0		263	E	0	0	0	0		263	E	1	0	1		263	E	1	0	1		263	E	1	0	1		263
264	K	0	0	0		264	K	0	0	0		264	K	0	0	0		264	K	0	0	0		264	K	0	0	0	0		264	K	1	0	1		264	K	1	0	1		264	K	1	0	1		264
265	E	0	0	0		265	D	0	1	1		265	E	0	0	0		265	E	0	0	0		265	E	0	0	0	0		265	E	1	0	1		265	E	1	0	1		265	E	1	0	1		265
266	R	0	0	0		266	R	0	0	0		266	K	0	0	0		266	K	0	0	0		266	K	0	0	0	0		266	K	1	0	1		266	K	1	0	1		266	K	1	0	1		266
267	Y	0	0	0		267	Y	0	0	0		267	Y	0	0	0		267	Y	0	0	0		267	Y	0	0	0	0		267	Y	1	0	1		267	Y	1	0	1		267	Y	1	0	1		267
268	K	0	0	0		268	K	0	1	1		268	K	0	0	0		268	K	0	0	0		268	K	0	0	0	0		268	K	1	0	1		268	K	1	0	1		268	K	1	0	1		268
269	S	0	0	0		269	S	0	1	1		269	S	0	0	0		269	S	0	0	0		269	S	0	0	0	0		269	S	1	0	1		269	S	1	0	1		269	S	1	0	1		269
270	I	0	0	0		270	L	0	0	0		270	I	0	0	0		270	I	0	0	0		270	I	0	0	0	0		270	I	1	0	1		270	I	1	0	1		270	I	1	0	1		270
271	S	0	0	0		271	A	0	0	0		271	S	0	0	0		271	S	0	0	0		271	S	0	0	0	0		271	T	1	0	1		271	T	1	0	1		271	T	1	0	1		271
272	E	0	0	0		272	D	0	0	0		272	D	0	0	0		272	D	0	0	0		272	D	0	0	0	0		272	D	1	0	1		272	D	1	0	1		272	D	1	0	1		272
273	E	0	0	0		273	E	0	0	0		273	E	0	0	0		273	E	0	0	0		273	E	0	0	0	0		273	E	1	0	1		273	E	1	0	1		273	E	1	0	1		273
274	L	0	0	0		274	M	0	0	0		274	L	0	0	0		274	L	0	0	0		274	L	0	0	0	0		274	L	1	0	1		274	L	1	0	1		274	L	1	0	1		274
275	D	0	0	0		275	D	0	0	0		275	D	0	0	0		275	D	0	0	0		275	D	0	0	0	0		275	D	1	0	1		275	D	1	0	1		275	D	1	0	1		275
276	Q	0	1	1		276	S	0	1	1		276	Q	0	0	0		276	Q	0	0	0		276	Q	0	0	0	0		276	Q	1	1	2		276	Q	1	1	2		276	Q	1	1	2		276
277	T	0	0	0		277	T	0	0	0		277	T	0	0	0		277	T	0	0	0		277	T	0	0	0	0		277	T	1	0	1		277	T	1	0	1		277	T	1	0	1		277
278	F	0	0	0		278	F	0	0	0		278	F	0	0	0		278	F	0	0	0		278	F	0	0	0	0		278	F	1	0	1		278	F	1	0	1		278	F	1	0	1		278
279	Q	0	1	1		279	A	0	0	0		279	A	0	0	0		279	A	0	0	0		279	A	0	0	0	0		279	S	1	0	1		279	S	1	0	1		279	S	1	0	1		279
280	E	0	0	0		280	E	0	0	0		280	E	0	0	0		280	E	0	0	0		280	E	0	0	0	0		280	E	1	0	1		280	E	1	0	1		280	E	1	0	1		280
281	L	0	0	0		281	L	0	0	0		281	L	0	0	0		281	L	0	0	0		281	L	0	0	0	0		281	L	1	0	1		281	L	1	0	1		281	L	1	0	1		281
282	S	0	1	1		282	A	0	0	0		282	T	0	0	0		282	T	0	0	0		282	T	0	0	0	0		282	S	1	0	1		282	S	1	0	1		282	S	1	0	1		282
283	G	0	1	1		283	G	0	0	0		283	G	0	0	0		283	G	0	0	0		283	G	0	0	0	0		283	G	1	0	1		283	G	1	0	1		283	G	1	0	1		283
284	Y	0	0	0		284	Y	0	0	0		284	Y	0	0	0		284	Y	0	0	0		284	Y	0	0	0	0		284	Y	1	0	1		284	Y	1	0	1		284	Y	1	0	1		284
285	R	0	0	0		285	-	0	0	0		285	-	0	0	0		285	-	0	0	0		285	-	0	0	0	0		285	-	0	0	0		285	-	0	0	0		285	-	0	0	0		285
286	S	0	0	0		286	-	0	0	0		286	-	0	0	0		286	-	0	0	0		286	-	0	0	0	0		286	-	0	0	0		286	-	0	0	0		286	-	0	0	0		286
287	D	0	0	0		287	-	0	0	0		287	-	0	0	0		287	-	0	0	0		287	-	0	0	0	0		287	-	0	0	0		287	-	0	0	0		287	-	0	0	0		287
[truncated: 9 more columns]

## Sheet: Candidate_B_epitopes
Tropomyosin	ID	AlgPred + BepiPred peptide	Start	End	Length
Asc l 3	p_01	EVARKLAMVEA	164	174	11
Asc l 3	p_02	ELEEELRVVGNNLKSLEVSEEK	192	213	22
Asc l 3	p_03	KEVDRLED	251	258	8
Aed a 10	p_04	KVLENRSQQDEERM	128	141	14
Aed a 10	p_05	KEVDRLED	251	258	8
Der p 10	p_06	VAALNRRIQLI	85	95	11
Der p 10	p_07	EVARKLAMVEA	164	174	11
Der p 10	p_08	ELEEELRVVGNNLKSLEVSEEK	192	213	22
Der f 10	p_09	VAALNRRIQLI	85	95	11
Der f 10	p_10	EVARKLAMVEA	164	174	11
Der f 10	p_11	ELEEELRVVGNNLKSLEVSEEK	192	213	22
Blo t 10	p_12	VAALNRRIQLIEED	85	98	14
Blo t 10	p_13	DEVARKLAMVEA	163	174	12
Blo t 10	p_14	ELEEELRVVGNNLKSLEVSEEK	192	213	22
Blo t 10	p_15	KEVDRLED	251	258	8
Lit v 1	p_16	KRMQQLEN	48	55	8
Lit v 1	p_17	ALNRRIQLLEEDLERSEE	87	104	18
Lit v 1	p_18	NRSLSDEERMDALENQLKEARF	132	153	22
Lit v 1	p_19	RKYDEVARKLAMVEA	160	174	15
Lit v 1	p_20	ELEEELRVVGNNLKSLEVSEEKANQREEAYKE	192	223	32
Lit v 1	p_21	KEVDRLED	251	258	8
Pen m 1	p_22	KRMQQLEN	48	55	8
Pen m 1	p_23	ALNRRIQLLEEDLERSEE	87	104	18
Pen m 1	p_24	NRSLSDEERMDALENQLKEARF	132	153	22
Pen m 1	p_25	RKYDEVARKLAMVEA	160	174	15
Pen m 1	p_26	ELEEELRVVGNNLKSLEVSEEKANQREEAYKE	192	223	32
Pen m 1	p_27	KEVDRLED	251	258	8
Pen a 1	p_28	KRMQQLEN	48	55	8
Pen a 1	p_29	ALNRRIQLLEEDLERSEE	87	104	18
Pen a 1	p_30	NRSLSDEERMDALENQLKEARF	132	153	22
Pen a 1	p_31	RKYDEVARKLAMVEA	160	174	15
Pen a 1	p_32	ELEEELRVVGNNLKSLEVSEEKANQREEAYKE	192	223	32
Pen a 1	p_33	KEVDRLED	251	258	8
Per a 7	p_34	RRIQLLEEDLER	90	101	12
Per a 7	p_35	EELRVVGNNLKSLEV	195	209	15
Per a 7	p_36	KEVDRLED	251	258	8
Bla g 7	p_37	RRIQLLEEDLER	90	101	12
Bla g 7	p_38	EELRVVGNNLK	195	205	11
Bla g 7	p_39	KEVDRLEDELV	251	261	11

## Sheet: Cluster_consensus
Cluster.Sub-Cluster Number	Peptide Number	Alignment	Position	Asc l 3	Aed a 10	Der p 10	Der f 10	Blo t 10	Lit v 1	Pen m 1	Pen a 1	Per a 7	Bla g 7	Peptide
1.1	Consensus	ELEEELRVVGNNLKSLEVSEEKANQREEAYKE	-	87.5	78.12	87.5	90.62	90.62	100	100	100	90.62	90.62
1.1	1	ELEEELRVVGNNLKSLEVSEEKANQREEAYKE	1											ELEEELRVVGNNLKSLEVSEEKANQREEAYKE
1.1	2	ELEEELRVVGNNLKSLEVSEEK----------	1											ELEEELRVVGNNLKSLEVSEEK
1.1	3	----EELRVVGNNLKSLEV--------------	4											EELRVVGNNLKSLEV
1.1	4	----EELRVVGNNLK------------------	4											EELRVVGNNLK
2.1	Consensus	VAALNRRIQLXEEDLERSEE	-
2.1	1	VAALNRRIQLIEED------	1	75	70	100	100	100	95	95	95	95	95	VAALNRRIQLIEED
2.1	2	VAALNRRIQLI---------	1											VAALNRRIQLI
2.1	3	---ALNRRIQLLEEDLERSEE	3	80	70	95	95	95	100	100	100	100	100	ALNRRIQLLEEDLERSEE
2.1	4	--------RRIQLLEEDLER---	6											RRIQLLEEDLER
3.1	Consensus	RKYDEVARKLAMVEA	-	100	66.67	100	100	100	100	100	100	93.33	93.33
3.1	1	RKYDEVARKLAMVEA	1											RKYDEVARKLAMVEA
3.1	2	-----DEVARKLAMVEA	4											DEVARKLAMVEA
3.1	3	-------EVARKLAMVEA	5											EVARKLAMVEA
4.1	Consensus	KEVDRLEDELV	-	100	90.91	90.91	100	100	100	100	100	100	100
4.1	1	KEVDRLEDELV	1											KEVDRLEDELV
4.1	2	KEVDRLED---	1											KEVDRLED
5.1	Singleton	NRSLSDEERMDALENQLKEARF	-	59	77.27	72.73	77.27	72.73	100	100	100	81.82	81.82	NRSLSDEERMDALENQLKEARF
6.1	Singleton	KVLENRSQQDEERM	-	78.57	100	71.43	71.43	71.43	85.71	85.71	85.71	57.14	57.14	KVLENRSQQDEERM
7.1	Singleton	KRMQQLEN	-	62.5	62.5	62.5	62.5	62.5	100	100	100	62.5	62.5	KRMQQLEN

## Sheet: T epitope
Candidate T-epitopes of tropomyosins							Candidate T-epitopes with 100% of identity								Epitope Cluster Analysis - 70% of identity
Peptide Number	Alignment	Start	End	Length	HLA-II allele		SeqID	Peptide Number	Alignment	Start	End	Length	HLA-II allele		Peptide Number	Alignment	Position	Description	Peptide	Start	End	Length	Asc l 3	Aed a 10	Der p 10	Der f 10	Blo t 10	Lit v 1	Pen m 1	Pen a 1	Bla g 7	Per a 7
Asc_T_01	MQAMKIEKDNALDRADAA	8	22	15	HLA-DRB1*03:01		Seq01	Aed_T_01	KMQAMKLEKDNAADKAD	7	21	15	HLA-DRB1*04:01 HLA-DRB1*04:04		Consensus	KMQAMKLEKDNAXDRADXA	-	-	-	7	25	19
Asc_T_02	AQEDLSVANSNLEEKE	60	75	16	HLA-DRB1*04:05		Seq02	Asc_T_01	MQAMKIEKDNALDRADAA	8	22	15	HLA-DRB1*03:01		1	KMQAMKLEKDNAADKAD--	1	seq1	KMQAMKLEKDNAADKAD	7	23	17	82.35	100	82.35	82.35	82.35	88.24	88.24	88.24	82.35	82.35
Asc_T_03	ADRKYDEVARKLAMVE	158	173	16	HLA-DRB1*11:01		Seq03	Derp_T_01 Derf_T_01 Blo_T_01	QAMKLEKDNAIDRAEI	9	24	16	HLA-DRB1*03:01		2	-MQAMKIEKDNALDRADAA	2	seq2	MQAMKIEKDNALDRADAA	8	25	18	100	72.22	77.78	77.78	77.78	77.78	77.78	77.78	72.22	66.67
Asc_T_04	VARKLAMVEADLERAE	165	180	16	HLA-DQA1*03:01/DQB1*03:02		Seq04	Lit_T_01 Pena_T_01 Penm_T_01	QAMKLEKDNAMDRADT	9	24	15	HLA-DRB1*03:01		3	--QAMKLEKDNAIDRAEI-	3	seq3	QAMKLEKDNAIDRAEI	9	24	16	75	75	100	100	100	81.25	81.25	81.25	81.25	75
Asc_T_05	VGNNLKSLEVSEEKAL	200	215	16	HLA-DQA1*03:01/DQB1*03:02		Seq05	Bla_T_01	ARDANIRAEKAEEEARS	29	45	17	HLA-DQA1*03:01/DQB1*03:02 HLA-DQA1*05:01/DQB1*02:01		4	--QAMKLEKDNAMDRADT-	3	seq4	QAMKLEKDNAMDRADT	9	24	16	81.25	87.5	81.25	81.25	81.25	100	100	100	87.5	81.25
Asc_T_06	REDSYEEQIRTVSAR	217	231	15	HLA-DRB1*11:01		Seq06	Derp_T_02 Derf_T_02 Blo_T_02	KSEEEVRALQKKIQQIENELDQVQE	38	62	25	HLA-DRB1*11:01 HLA-DRB1*11:04 HLA-DRB1*04:04 HLA-DRB1*04:05		Singleton	ARDANIRAEKAEEEARS	-	seq5	ARDANIRAEKAEEEARS	29	45	17	41.18	47.06	76.47	76.47	70.59	52.94	52.94	52.94	100	94.12
Asc_T_07	HEKERYKSISEELDQTF	262	278	17	HLA-DRB1*04:05 HLA-DQA1*03:01/DQB1*03:02 HLA-DQA1*05:01/DQB1*02:01		Seq07	Lit_T_02 Pena_T_02 Penm_T_02	SEEEVHNLQKRMQQLE	39	54	15	HLA-DRB1*11:04		Singleton	SEEEVHNLQKRMQQLE	-	seq7	SEEEVHNLQKRMQQLE	39	54	16	50	43.75	68.75	68.75	68.75	100	100	100	56.25	56.25
Aed_T_01	KMQAMKLEKDNAADKAD	7	21	15	HLA-DRB1*04:01 HLA-DRB1*04:04		Seq08	Per_T_01 Bla_T_02	SLQKKIQQIENDLDQTM	45	61	15	HLA-DRB1*04:05		Consensus	KSEEEVRXLQKKIQQIENXLDQXXE	-	-	-			1
Aed_T_02	STEANVAALTRKVQQVEE	80	97	18	HLA-DRB1*11:01 HLA-DRB1*11:04		Seq09	Asc_T_04	AQEDLSVANSNLEEKE	60	75	16	HLA-DRB1*04:05		1	KSEEEVRALQKKIQQIENELDQVQE	1	seq6	KSEEEVRALQKKIQQIENELDQVQE	38	62	25	56	40	100	100	100	76	76	76	76	76
Aed_T_03	VGNSLKSLEVSEDKANQRVEE	200	220	21	HLA-DRB1*04:05 HLA-DQA1*03:01/DQB1*03:02 HLA-DRB1*03:01		Seq10	Lit_T_03 Pena_T_03 Penm_T_03	LKANIQLVEKDKALSNAE	65	82	15	HLA-DRB1*14:01 HLA-DRB1*11:04		2	-------SLQKKIQQIENDLDQTM-	8	seq8	SLQKKIQQIENDLDQTM	45	61	17	52.94	41.18	76.47	76.47	76.47	64.71	64.71	64.71	100	100
Aed_T_04	VNKDRYKSLADEMDSTFA	262	279	18	HLA-DRB1*04:05 HLA-DQA1*03:01/DQB1*03:02		Seq11	Aed_T_02	STEANVAALTRKVQQVEE	80	97	18	HLA-DRB1*11:01 HLA-DRB1*11:04		Singleton	AQEDLSVANSNLEEKE	-	seq9	AQEDLSVANSNLEEKE	60	75	16	100	50	68.75	68.75	62.5	50	50	50	37.5	37.5
Derp_T_01	QAMKLEKDNAIDRAEI	9	24	16	HLA-DRB1*03:01		Seq12	Derp_T_03 Derf_T_03 Blo_T_03	TAEGDVAALNRRIQLIE	80	96	17	HLA-DRB1*11:04 HLA-DRB1*11:01		Singleton	LKANIQLVEKDKALSNAE	-	seq10	LKANIQLVEKDKALSNAE	65	82	18	44.44	44.44	55.56	55.56	50	100	100	100	61.11	61.11
Derp_T_02	KSEEEVRALQKKIQQIENELDQVQE	38	62	25	HLA-DRB1*11:01 HLA-DRB1*11:04 HLA-DRB1*04:04 HLA-DRB1*04:05		Seq13	Lit_T_04 Pena_T_04 Penm_T_04	NAEGEVAALNRRIQLLE	80	96	15	HLA-DRB1*11:04 HLA-DRB1*11:01		Singleton	STEANVAALTRKVQQVEE	-	seq11	STEANVAALTRKVQQVEE	80	97	18	50	100	50	50	50	50	50	50	50	50
Derp_T_03	TAEGDVAALNRRIQLIE	80	96	17	HLA-DRB1*11:04 HLA-DRB1*11:01		Seq14	Per_T_02 Bla_T_03	NAESEVAALNRRIQLLE	80	96	15	HLA-DRB1*11:04		Consensus	NAEGEVAALNRRIQLLE	-	-	-	80	96	17
Derp_T_04	ADRKYDEVARKLAMVE	158	173	16	HLA-DRB1*11:01		Seq15	Asc_T_03 Derp_T_04 Derf_T_04 Blo_T_04 Lit_T_05 Pena_T_05 Penm_T_05	ADRKYDEVARKLAMVE	158	173	16	HLA-DRB1*11:01		1	TAEGDVAALNRRIQLIE	1	seq12	TAEGDVAALNRRIQLIE	80	96	17	64.71	47.06	100	100	100	82.35	82.35	82.35	76.47	76.47
Derp_T_05	VARKLAMVEADLERAE	165	180	16	HLA-DQA1*03:01/DQB1*03:02		Seq16	Per_T_03 Bla_T_05	ADKKYDEVARKLAMVE	158	173	15	HLA-DRB1*11:01		2	NAESEVAALNRRIQLLE	1	seq14	NAESEVAALNRRIQLLE	80	96	17	76.47	47.06	76.47	76.47	76.47	94.12	94.12	94.12	100	100
Derp_T_06	VGNNLKSLEVSEEKAQ	200	215	16	HLA-DQA1*03:01/DQB1*03:02 HLA-DRB1*04:05		Seq17	Asc_T_06 Derp_T_05 Derf_T_05 Blo_T_05 Lit_T_06 Pena_T_06 Penm_T_06 Per_T_04 Bla_T_04	VARKLAMVEADLERAE	165	180	16	HLA-DQA1*03:01/DQB1*03:02		3	NAEGEVAALNRRIQLLE	1	seq13	NAEGEVAALNRRIQLLE	80	96	17	76.47	47.06	82.35	82.35	82.35	100	100	100	94.12	94.12
Derp_T_07	ERSVQKLQKEVGRLE	243	257	15	HLA-DRB1*11:04		Seq18	Asc_T_05	VGNNLKSLEVSEEKAL	200	215	16	HLA-DQA1*03:01/DQB1*03:02		Consensus	ADXKYDEVARKLAMVE	-	-	-	158	173	16
Derp_T_08	VHEKEKYKSISDELDQTFA	261	279	19	HLA-DQA1*05:01/DQB1*02:01 HLA-DRB1*04:01 HLA-DRB1*04:05 HLA-DQA1*03:01/DQB1*03:02		Seq19	Aed_T_03	VGNSLKSLEVSEDKANQRVEE	200	220	21	HLA-DRB1*04:05 HLA-DQA1*03:01/DQB1*03:02 HLA-DRB1*03:01		1	ADRKYDEVARKLAMVE	1	seq15	ADRKYDEVARKLAMVE	158	173	16	100	75	100	100	100	100	100	100	93.75	93.75
Derf_T_01	QAMKLEKDNAIDRAEI	9	24	16	HLA-DRB1*03:01		Seq20	Derp_T_06 Derf_T_06 Blo_T_06	VGNNLKSLEVSEEKAQ	200	215	16	HLA-DQA1*03:01/DQB1*03:02 HLA-DRB1*04:05		2	ADKKYDEVARKLAMVE	1	seq16	ADKKYDEVARKLAMVE	158	173	16	93.75	75	93.75	93.75	93.75	93.75	93.75	93.75	100	100
Derf_T_02	KSEEEVRALQKKIQQIENELDQVQE	38	62	25	HLA-DRB1*11:01 HLA-DRB1*11:04 HLA-DRB1*04:05		Seq21	Lit_T_07 Pena_T_07 Penm_T_07 Per_T_05 Bla_T_06	VGNNLKSLEVSEEKAN	200	215	15	HLA-DQA1*03:01/DQB1*03:02 HLA-DRB1*04:05		Singleton	VARKLAMVEADLERAE	-	seq17	VARKLAMVEADLERAE	165	180	16	100	68.75	100	100	100	100	100	100	100	100
Derf_T_03	TAEGDVAALNRRIQLIE	80	96	17	HLA-DRB1*11:04 HLA-DRB1*11:01		Seq22	Asc_T_07	REDSYEEQIRTVSAR	217	231	15	HLA-DRB1*11:01		Consensus	VGNNLKSLEVSEEKAXQRVEE	-	-	-	200	215	16
Derf_T_04	ADRKYDEVARKLAMVE	158	173	16	HLA-DRB1*11:01		Seq23	Derp_T_07	ERSVQKLQKEVGRLE	243	257	15	HLA-DRB1*11:04		1	VGNSLKSLEVSEDKANQRVEE	1	seq19	VGNSLKSLEVSEDKANQRVEE	200	220	21	71.43	100	76.19	76.19	76.19	80.95	80.95	80.95	80.95	80.95
Derf_T_05	VARKLAMVEADLERAE	165	180	16	HLA-DQA1*03:01/DQB1*03:02		Seq24	Derp_T_08 Derf_T_07 Blo_T_07	VHEKEKYKSISDELDQTFA	261	279	19	HLA-DQA1*05:01/DQB1*02:01 HLA-DRB1*04:01 HLA-DRB1*04:05 HLA-DQA1*03:01/DQB1*03:02		2	VGNNLKSLEVSEEKAL-----	1	seq18	VGNNLKSLEVSEEKAL	200	215	16	100	81.25	93.75	93.75	93.75	93.75	93.75	93.75	93.75	93.75
Derf_T_06	VGNNLKSLEVSEEKAQ	200	215	16	HLA-DQA1*03:01/DQB1*03:02 HLA-DRB1*04:05		Seq25	Lit_T_08 Pena_T_08 Penm_T_08	VNEKEKYKSITDELDQTFS	261	279	15	HLA-DQA1*05:01/DQB1*02:01 HLA-DRB1*04:01 HLA-DRB1*04:05 HLA-DQA1*03:01/DQB1*03:02		3	VGNNLKSLEVSEEKAQ-----	1	seq20	VGNNLKSLEVSEEKAQ	200	215	16	93.75	81.25	100	100	100	93.75	93.75	93.75	93.75	93.75
Derf_T_07	VHEKEKYKSISDELDQTFA	261	279	19	HLA-DQA1*05:01/DQB1*02:01 HLA-DRB1*04:01 HLA-DRB1*04:05 HLA-DQA1*03:01/DQB1*03:02		Seq26	Asc_T_02	HEKERYKSISEELDQTF	262	278	17	HLA-DRB1*04:05 HLA-DQA1*03:01/DQB1*03:02 HLA-DQA1*05:01/DQB1*02:01		4	VGNNLKSLEVSEEKAN-----	1	seq21	VGNNLKSLEVSEEKAN	200	215	16	93.75	87.5	93.75	93.75	93.75	100	100	100	100	100
Blo_T_01	QAMKLEKDNAIDRAEI	9	24	16	HLA-DRB1*03:01		Seq27	Aed_T_04	VNKDRYKSLADEMDSTFA	262	279	18	HLA-DRB1*04:05 HLA-DQA1*03:01/DQB1*03:02		Singleton	REDSYEEQIRTVSAR	-	seq22	REDSYEEQIRTVSAR	217	231	15	100	26.67	40	53.33	46.67	46.67	46.67	46.67	46.67	46.67
Blo_T_02	KSEEEVRALQKKIQQIENELDQVQE	38	62	25	HLA-DRB1*11:01 HLA-DRB1*11:04 HLA-DRB1*04:05		Seq28	Bla_T_07	EKEKYKYICDDLDMTF	263	278	16	HLA-DRB1*04:05		Singleton	ERSVQKLQKEVGRLE	-	seq23	ERSVQKLQKEVGRLE	243	257	15	93.33	73.33	100	93.33	86.67	93.33	93.33	93.33	93.33	93.33
Blo_T_03	TAEGDVAALNRRIQLIE	80	95	16	HLA-DRB1*11:04										Consensus	VHEKEKYKSIXDELDQTFX	-	-	-	261	279	19
Blo_T_04	ADRKYDEVARKLAMVE	158	173	16	HLA-DRB1*11:01										1	VHEKEKYKSISDELDQTFA	1	seq24	VHEKEKYKSISDELDQTFA	261	279	19	84.21	52.63	100	100	100	84.21	84.21	84.21	73.68	73.68
Blo_T_05	VARKLAMVEADLERAE	165	180	16	HLA-DQA1*03:01/DQB1*03:02										2	VNEKEKYKSITDELDQTFS	1	seq25	VNEKEKYKSITDELDQTFS	261	279	19	73.68	47.37	84.21	84.21	84.21	100	100	100	68.42	68.42
Blo_T_06	VGNNLKSLEVSEEKAQ	200	215	16	HLA-DQA1*03:01/DQB1*03:02 HLA-DRB1*04:05										3	-HEKERYKSISEELDQTF-	2	seq26	HEKERYKSISEELDQTF	262	278	17	100	52.94	88.24	88.24	88.24	76.47	76.47	76.47	64.71	64.71
Blo_T_07	VHEKEKYKSISDELDQTFA	261	279	19	HLA-DQA1*05:01/DQB1*02:01 HLA-DRB1*04:01 HLA-DRB1*04:05 HLA-DQA1*03:01/DQB1*03:02										4	--EKEKYKYICDDLDMTF-	3	seq28	EKEKYKYICDDLDMTF	263	278	16	62.5	43.75	75	75	75	75	75	75	100	93.75
Lit_T_01	QAMKLEKDNAMDRADT	9	24	15	HLA-DRB1*03:01										Singleton	VNKDRYKSLADEMDSTFA	-	seq27	VNKDRYKSLADEMDSTFA	261	279	19	50	100	55.56	55.56	55.56	50	50	50	38.89	38.89
Lit_T_02	SEEEVHNLQKRMQQLE	39	54	15	HLA-DRB1*11:04
Lit_T_03	LKANIQLVEKDKALSNAE	65	82	15	HLA-DRB1*14:01 HLA-DRB1*11:04
Lit_T_04	NAEGEVAALNRRIQLLE	80	96	15	HLA-DRB1*11:04 HLA-DRB1*11:01
Lit_T_05	ADRKYDEVARKLAMVE	158	173	15	HLA-DRB1*11:01
Lit_T_06	VARKLAMVEADLERAE	165	180	15	HLA-DQA1*03:01/DQB1*03:02
Lit_T_07	VGNNLKSLEVSEEKAN	200	215	15	HLA-DQA1*03:01/DQB1*03:02 HLA-DRB1*04:05
Lit_T_08	VNEKEKYKSITDELDQTFS	261	279	15	HLA-DQA1*05:01/DQB1*02:01 HLA-DRB1*04:01 HLA-DRB1*04:05 HLA-DQA1*03:01/DQB1*03:02
Penm_T_01	QAMKLEKDNAMDRADT	9	24	15	HLA-DRB1*03:01
Penm_T_02	SEEEVHNLQKRMQQLE	39	54	15	HLA-DRB1*11:04
Penm_T_03	LKANIQLVEKDKALSNAE	65	82	15	HLA-DRB1*14:01 HLA-DRB1*11:04
Penm_T_04	NAEGEVAALNRRIQLLE	80	96	15	HLA-DRB1*11:04 HLA-DRB1*11:01
Penm_T_05	ADRKYDEVARKLAMVE	158	173	15	HLA-DRB1*11:01
Penm_T_06	VARKLAMVEADLERAE	165	180	15	HLA-DQA1*03:01/DQB1*03:02
Penm_T_07	VGNNLKSLEVSEEKAN	200	215	15	HLA-DQA1*03:01/DQB1*03:02 HLA-DRB1*04:05
Penm_T_08	VNEKEKYKSITDELDQTFS	261	279	15	HLA-DQA1*05:01/DQB1*02:01 HLA-DRB1*04:01 HLA-DRB1*04:05 HLA-DQA1*03:01/DQB1*03:02
Pena_T_01	QAMKLEKDNAMDRADT	9	24	15	HLA-DRB1*03:01
Pena_T_02	SEEEVHNLQKRMQQLE	39	54	15	HLA-DRB1*11:04
Pena_T_03	LKANIQLVEKDKALSNAE	65	82	15	HLA-DRB1*14:01 HLA-DRB1*11:04
Pena_T_04	NAEGEVAALNRRIQLLE	80	96	15	HLA-DRB1*11:04 HLA-DRB1*11:01
Pena_T_05	ADRKYDEVARKLAMVE	158	173	15	HLA-DRB1*11:01
Pena_T_06	VARKLAMVEADLERAE	165	180	15	HLA-DQA1*03:01/DQB1*03:02
Pena_T_07	VGNNLKSLEVSEEKAN	200	215	15	HLA-DQA1*03:01/DQB1*03:02 HLA-DRB1*04:05
Pena_T_08	VNEKEKYKSITDELDQTFS	261	279	15	HLA-DQA1*05:01/DQB1*02:01 HLA-DRB1*04:01 HLA-DRB1*04:05 HLA-DQA1*03:01/DQB1*03:02
Bla_T_01	ARDANIRAEKAEEEARS	29	45	17	HLA-DQA1*03:01/DQB1*03:02 HLA-DQA1*05:01/DQB1*02:01
Bla_T_02	SLQKKIQQIENDLDQTM	45	61	17	HLA-DRB1*04:05
Bla_T_03	NAESEVAALNRRIQLLE	80	96	17	HLA-DRB1*11:04
Bla_T_05	ADKKYDEVARKLAMVE	158	173	16	HLA-DRB1*11:01
Bla_T_04	VARKLAMVEADLERAE	165	180	16	HLA-DQA1*03:01/DQB1*03:02
Bla_T_06	VGNNLKSLEVSEEKAN	200	215	16	HLA-DQA1*03:01/DQB1*03:02 HLA-DRB1*04:05
Bla_T_07	EKEKYKYICDDLDMTF	263	278	16	HLA-DRB1*04:05
Per_T_01	SLQKKIQQIENDLDQTM	45	61	15	HLA-DRB1*04:05
Per_T_02	NAESEVAALNRRIQLLE	80	96	15	HLA-DRB1*11:04
Per_T_03	ADKKYDEVARKLAMVE	158	173	15	HLA-DRB1*11:01
Per_T_04	VARKLAMVEADLERAE	165	180	15	HLA-DQA1*03:01/DQB1*03:02
Per_T_05	VGNNLKSLEVSEEKAN	200	214	15	HLA-DQA1*03:01/DQB1*03:02 HLA-DRB1*04:05
